# Supplementary material for: Solvent effect on the 195Pt NMR properties in pyridonate-bridged PtIII dinuclear complex derivatives investigated by ab initio molecular dynamics and localized orbital analysis
Source: Royal Society of Chemistry journal article supplement (doi:10.1039/d0cp05849a), 2021-01-01
Supplement: d0cp05849a1.pdf [file d0cp05849a1.pdf]

## SUPPORTING INFORMATION

### Solvent effect on the $^{195}\text{Pt}$ NMR properties in pyridonate-bridged $\text{Pt}^{\text{III}}$ dinuclear complex derivatives investigated by *ab initio* molecular dynamics and localized orbital analysis

Patrick R. Batista,<sup>a</sup> Lucas C. Ducati,<sup>a\*</sup> Jochen Autschbach<sup>b\*</sup>

<sup>a</sup>Department of Fundamental Chemistry

Institute of Chemistry, University of São Paulo

Av. Prof. Lineu Prestes, 748

05508-000, São Paulo, SP, Brazil

<sup>b</sup>Department of Chemistry

University at Buffalo

State University of New York

Buffalo, NY 14260-3000, USA

\*email: ducati@iq.usp.br

\*email: jochena@buffalo.edu

May 26, 2021

# Contents

|           |                                                                                                    |            |
|-----------|----------------------------------------------------------------------------------------------------|------------|
| <b>1</b>  | <b>Studied Complexes</b>                                                                           | <b>S3</b>  |
| <b>2</b>  | <b>Solvent Structure</b>                                                                           | <b>S4</b>  |
| <b>3</b>  | <b>Dynamic properties</b>                                                                          | <b>S6</b>  |
| <b>4</b>  | <b>Solute Structure</b>                                                                            | <b>S8</b>  |
| <b>5</b>  | <b>Evolution of average</b>                                                                        | <b>S14</b> |
| <b>6</b>  | <b>Relativistic Scalar Correction on the <math>^1J_{\text{PtPt}}</math></b>                        | <b>S15</b> |
| <b>7</b>  | <b>PBE Functional with CPMD Configurations</b>                                                     | <b>S16</b> |
| 7.1       | Spin-Spin Coupling Constant - $^1J_{\text{PtPt}}$ . . . . .                                        | S16        |
| 7.2       | Chemical Shift - $\delta^{195}\text{Pt}$ . . . . .                                                 | S17        |
| <b>8</b>  | <b>Assessment of DFT Functional</b>                                                                | <b>S18</b> |
| <b>9</b>  | <b><i>J</i>-coupling analysis</b>                                                                  | <b>S21</b> |
| 9.1       | Natural Localized Molecular Orbitals . . . . .                                                     | S21        |
| 9.2       | Canonical Molecular Orbitals . . . . .                                                             | S22        |
| <b>10</b> | <b>Evolution of Average of the Shielding Tensor</b>                                                | <b>S25</b> |
| <b>11</b> | <b>Isotropic shielding of <math>^{195}\text{Pt}</math></b>                                         | <b>S28</b> |
| <b>12</b> | <b>Coordinates of atomic positions of the last one snapshot from CPMD equilibration trajectory</b> | <b>S29</b> |
| 12.1      | Diaquo complex $1^{\text{HH}}$ . . . . .                                                           | S29        |
| 12.2      | Diaquo complex $1^{\text{HT}}$ . . . . .                                                           | S34        |
| 12.3      | Dibromo complex $2^{\text{HH}}$ . . . . .                                                          | S39        |
| 12.4      | Dibromo complex $2^{\text{HT}}$ . . . . .                                                          | S45        |
| 12.5      | Dichloro complex $3^{\text{HH}}$ . . . . .                                                         | S50        |
| 12.6      | Dichloro complex $3^{\text{HT}}$ . . . . .                                                         | S55        |
| 12.7      | Aquabromo complex $4^{\text{HH}}$ . . . . .                                                        | S60        |
| 12.8      | Aquabromo complex $4^{\text{HT}}$ . . . . .                                                        | S65        |
| 12.9      | Aquachloro complex $5^{\text{HH}}$ . . . . .                                                       | S71        |
| 12.10     | Aquachloro complex $5^{\text{HT}}$ . . . . .                                                       | S76        |

This document provides additional radial distribution functions of solvent and solute, CPMD structural parameters of solute, relativistic scalar corrections on the  $^1J_{\text{PtPt}}$  results of NMR properties computed with CPMD configurations using nonhybrid functional, assessment of DFT functional and the evolution of average of the shielding tensor as support to discussion reported in the main text.

## 1 Studied Complexes

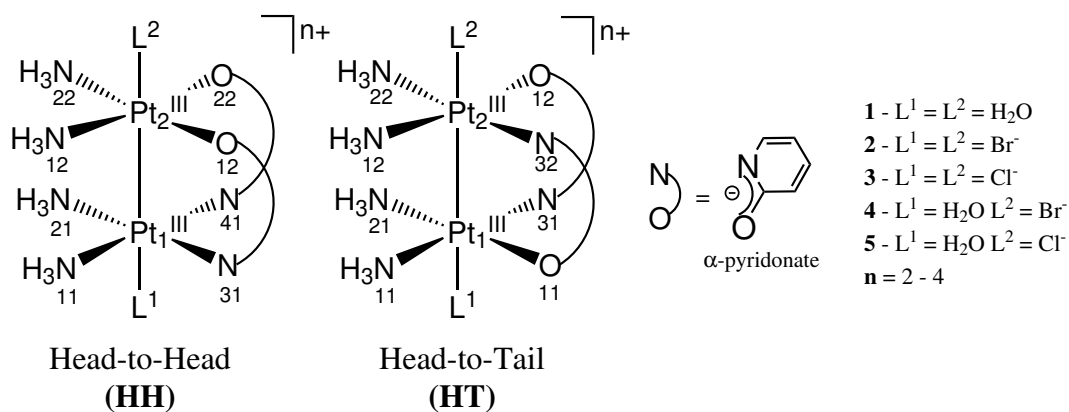

**Figure S1:** Head-to-Head (HH) and Head-to-Tail (HT) Pt–Pt  $\alpha$ -pyridonate-bridge complexes labeled.

## 2 Solvent Structure

The oxygen-oxygen radial distribution function (RDF) shows good agreement with theoretical studies in the literature at similar levels of theory.<sup>1,2</sup> All oxygen atoms are included in the RDF, including oxygen atoms that are part of the pyridonate motif and aquo ligands. These oxygen atoms are responsible for additional structure visible between 2.2 and 2.5 Å and the small shelf around 3.7 Å. Also, hydrogen-hydrogen RDF of HH and HT complexes corroborates with experiment.<sup>3-5</sup>

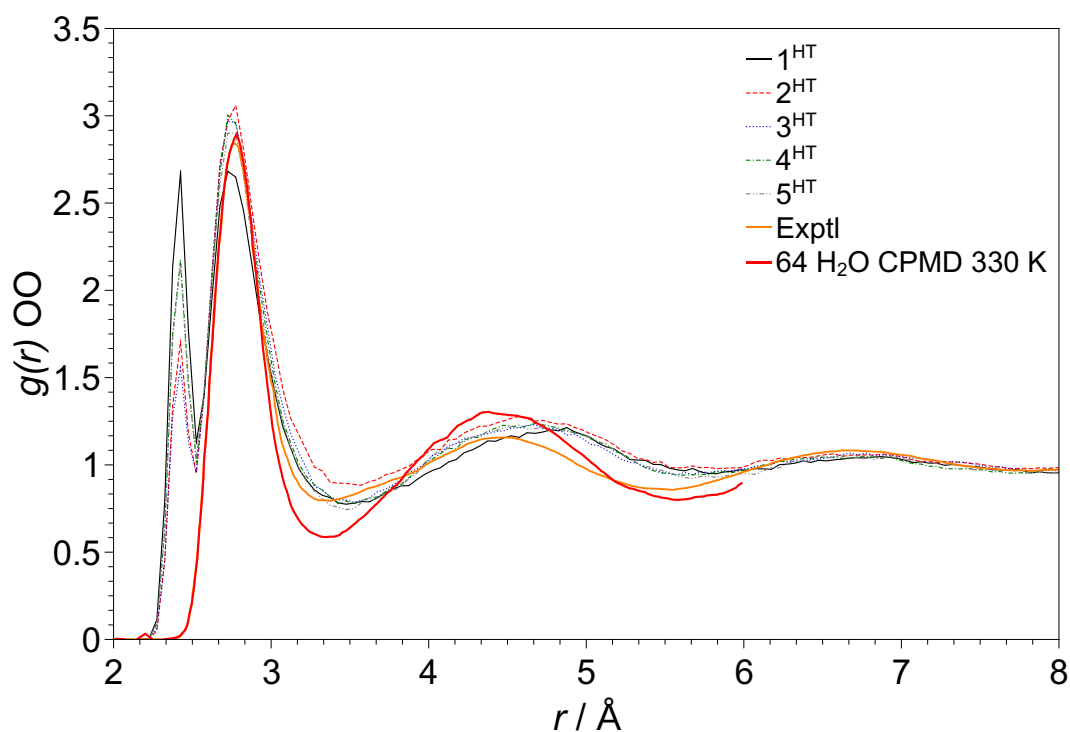

**Figure S2:** Oxygen-oxygen RDFs for each of the five explored HT Pt(III) complexes;  $g(r)_{OO}$  denotes the RDF or pair correlation as a function of pair distance in Å. The full orange line is the experimental oxygen-oxygen RDF for heavy water from the joint X-ray diffraction and neutron scattering experiments of Soper and Benmore<sup>6</sup>. The full red line is the theoretical oxygen-oxygen RDF for pure water obtained by CPMD at 330 K<sup>7</sup>. These latter two were extracted using the engage plot digitizer.<sup>8</sup>



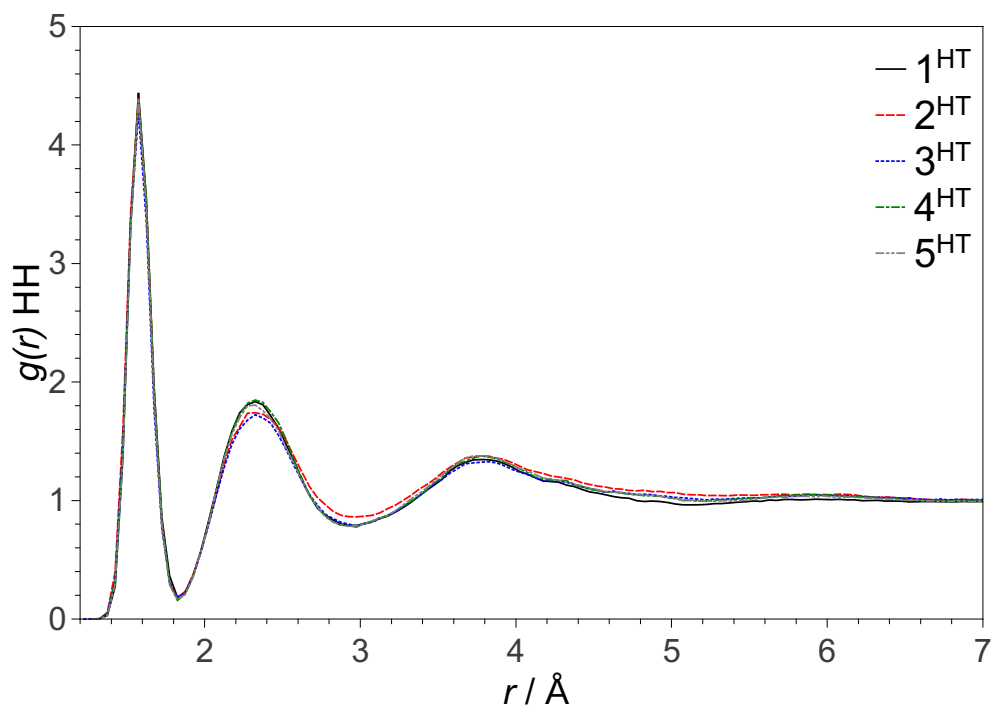

**Figure S3:** Hydrogen-hydrogen RDFs for 2000 configurations of the production trajectories of the five explored HT Pt(III) complexes.  $g(r)$  HH denotes the RDFs or pair correlations as a function of pair distance in Angstrom.

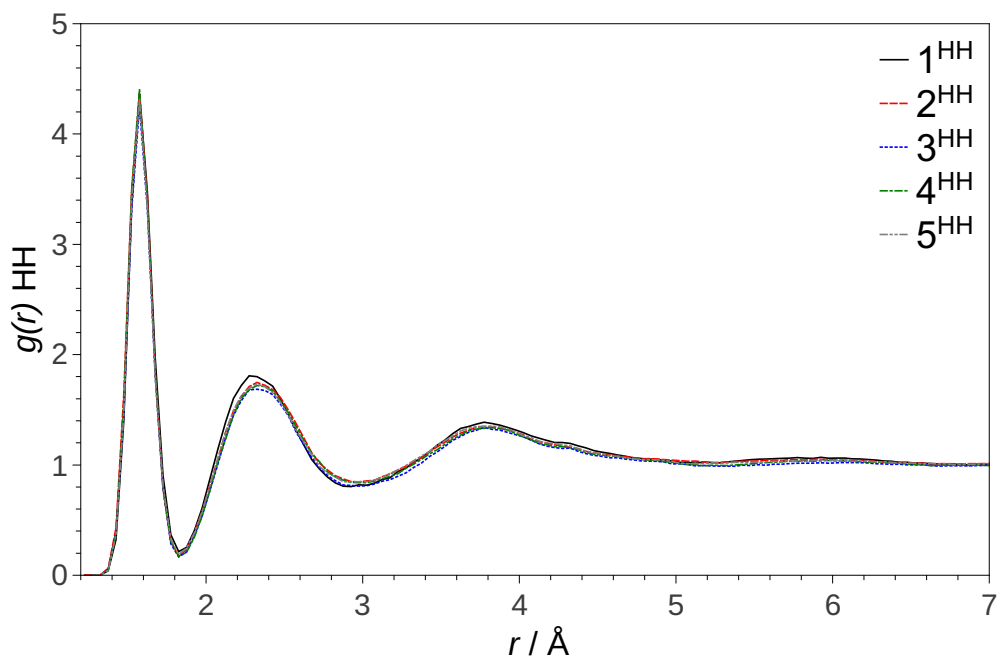

**Figure S4:** Hydrogen-hydrogen RDFs for 2000 configurations of the production trajectories of the five explored HH Pt(III) complexes.  $g(r)$  HH denotes the RDFs or pair correlations as a function of pair distance in Angstrom.

### 3 Dynamic properties

**Table S1:** Calculated average distances (in Å) between the Cl atoms of the perchlorate anions and Pt atoms of the complexes.

| Complex         | Distance   | Mean      |
|-----------------|------------|-----------|
| 1 <sup>HH</sup> | 10.6 ± 1.2 | 9.8 ± 0.7 |
| 1 <sup>HT</sup> | 8.9 ± 0.7  |           |
| 2 <sup>HH</sup> | 6.9 ± 1.0  | 6.6 ± 0.6 |
| 2 <sup>HT</sup> | 6.4 ± 0.8  |           |
| 3 <sup>HH</sup> | 9.2 ± 1.9  | 7.0 ± 1.0 |
| 3 <sup>HT</sup> | 5.6 ± 0.7  |           |
| 4 <sup>HH</sup> | 7.7 ± 0.9  | 7.2 ± 0.5 |
| 4 <sup>HT</sup> | 6.8 ± 0.6  |           |
| 5 <sup>HH</sup> | 7.8 ± 0.8  | 8.2 ± 0.6 |
| 5 <sup>HT</sup> | 8.5 ± 0.9  |           |

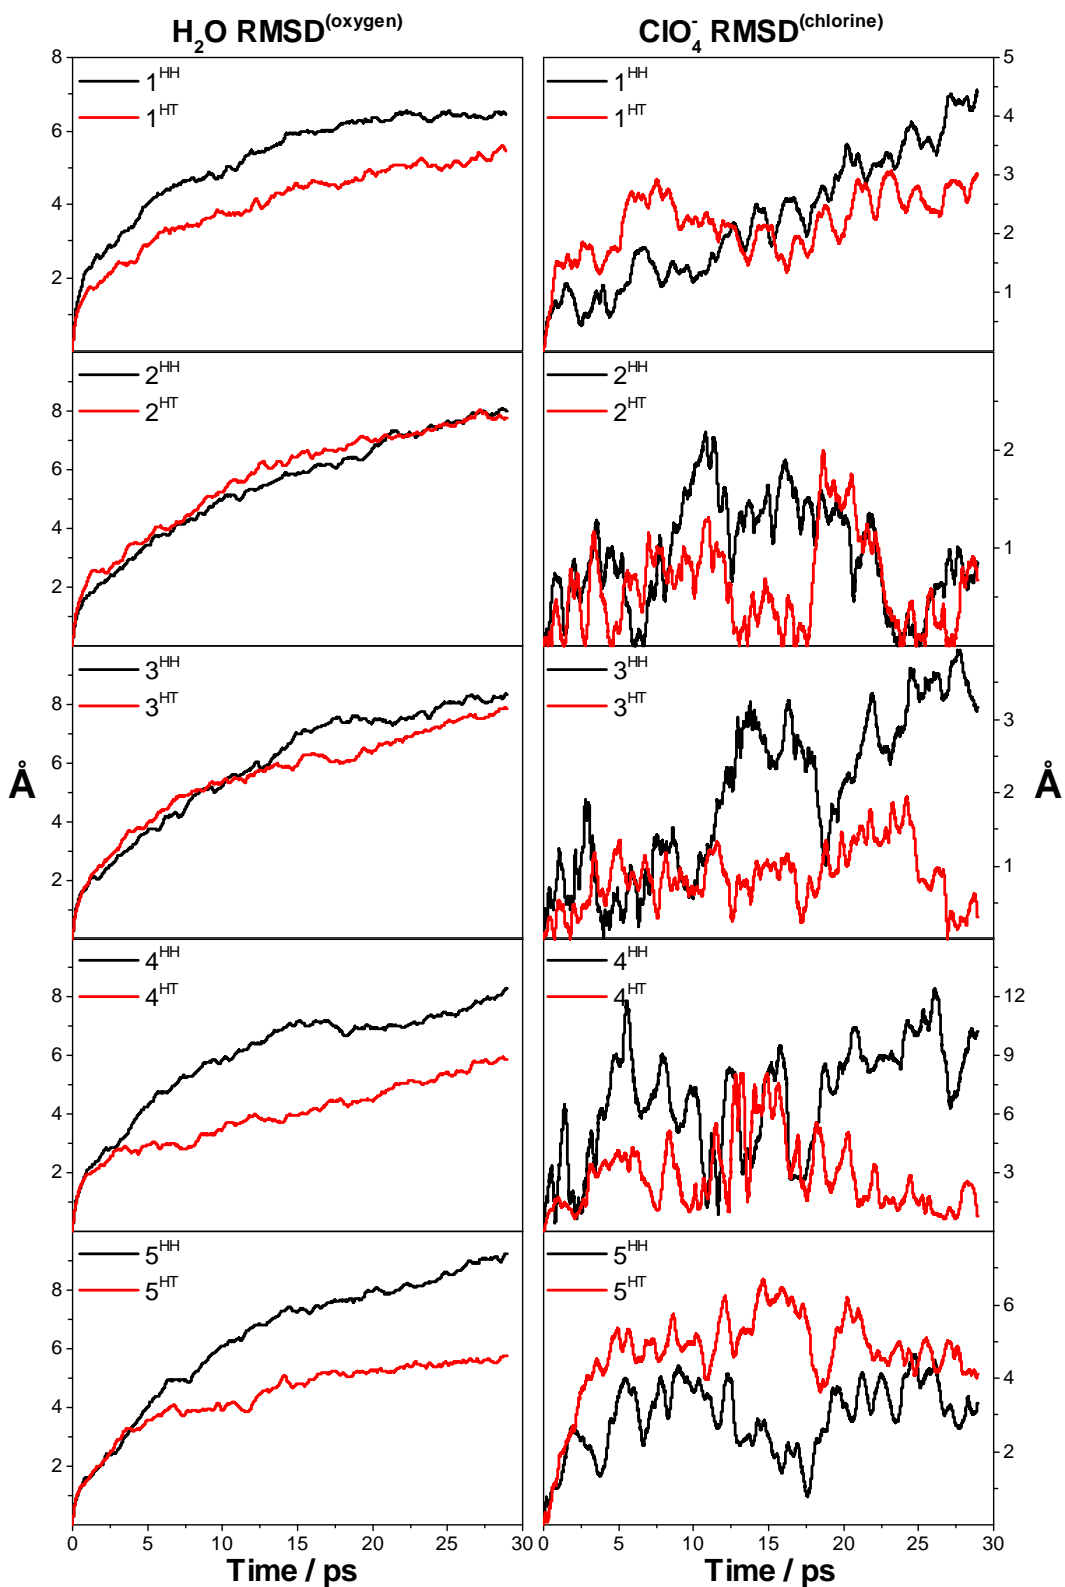

**Figure S5:** Root mean square deviations (RMSD) for the Cl atoms of the perchlorate anions and oxygen atoms of the water molecules obtained from production trajectory of the CPMD simulations for the HH and HT Pt<sup>III</sup> complexes.

## 4 Solute Structure

Likewise in HH complexes, the HT isomers have the same characteristics during the simulation according to their RDFs. Figure S6 shows the  $g(r)$ PtO of the HT complexes **1** to **5** as an average between two Pt atoms. The first peak between 1.8 Å and 2.6 Å corresponds to the bridge ligands oxygen and the axial aquo ligands directly bonded to the Pt atoms. The integrate (Figure S7) shows 2 oxygen atoms for the complex **1**, 1.5 for complexes **4** and **5** and 1 for complexes **2** and **3**. The peak that starts at 2.9 Å and ends at 3.2 Å corresponds to the bridge ligands oxygen that are not directly bonded to the Pt atoms, i.e., to the oxygen atom bonded to the opposite Pt atom. Thus, their integrate provides an average of 3 oxygen atoms for complex **1**, 2.5 for complexes **4** and **5** and 1 for complexes **2** and **3**. The third peak from 3.2 Å to 5.2 Å represents the first solvation shell, containing 13 solvent molecules for complex **1**, 11 for complexes **4** and **5**, 9 for complex **2** and 10 for complex **3**.

Figures S8 to S12 show the evolution of average of main geometrical parameters for HH complexes. The rotation around Pt–Pt bond probed by dihedral angles is not make ease because of solute takes a twisted geometry (Figures 6C and 6D in the main text) when the Pt–Pt bond is elongated due to the bridging ligands antisymmetry. The average values of geometric parameters for HH and HT complexes are given in the Tables S2 and S3, respectively.

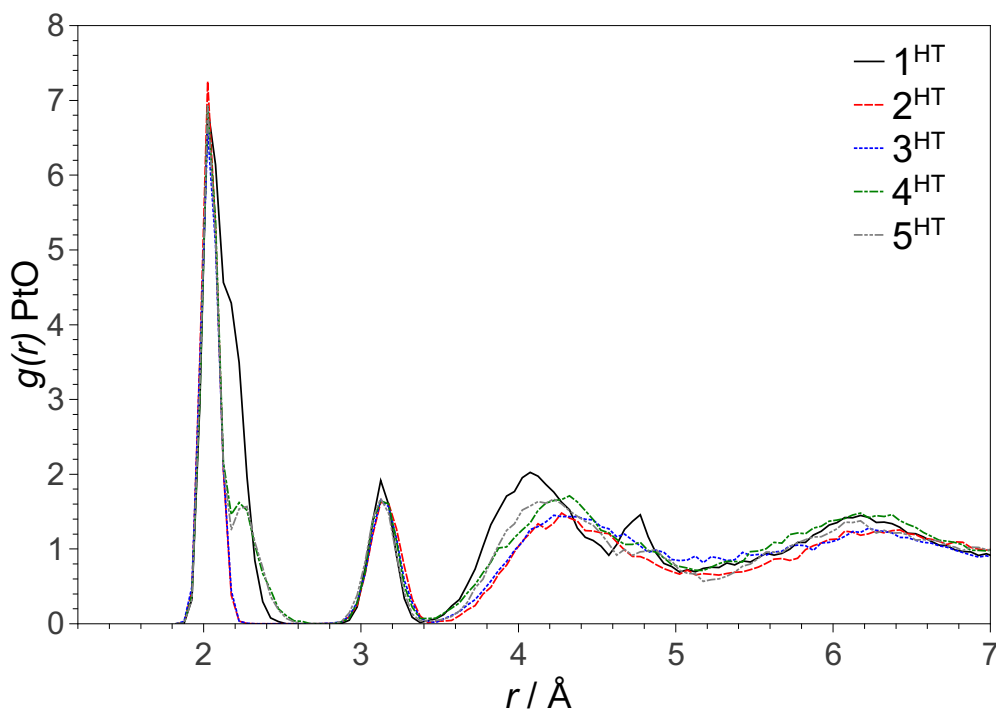

**Figure S6:** Platinum-oxygen RDFs for 2000 configurations of the production trajectories of the five explored HT Pt(III) complexes.  $g(r)$  PtO denotes the RDFs or pair correlations as a function of pair distance in Angstrom.

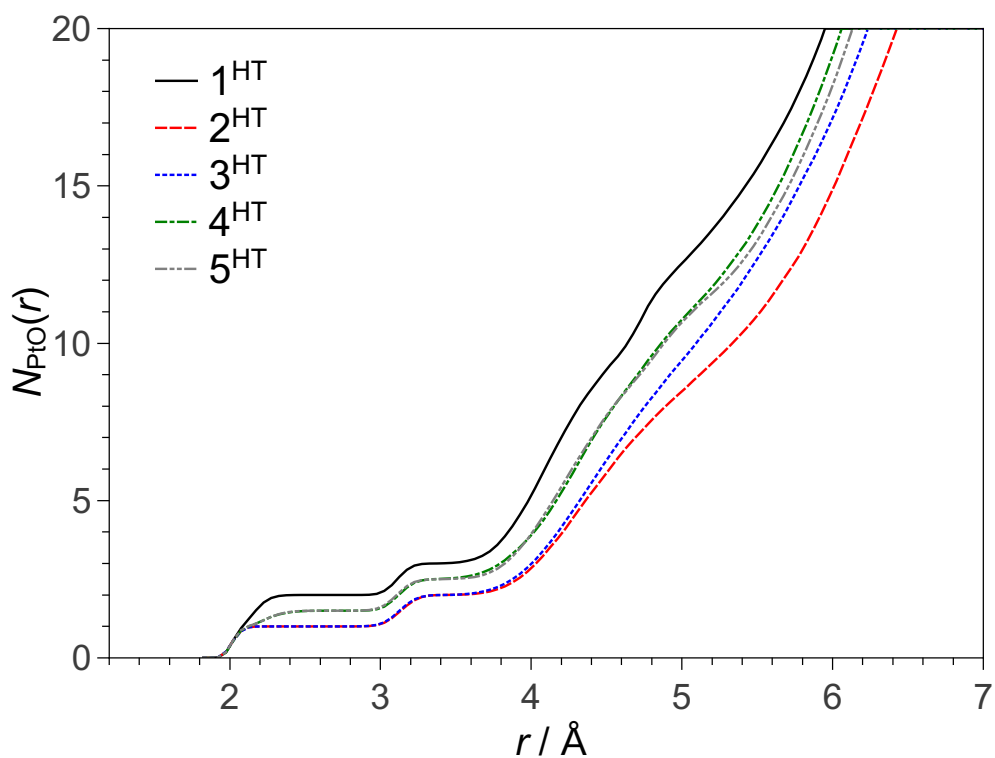

**Figure S7:** Platinum-oxygen RDF integrates for 2000 configurations of the production trajectories of the five explored HT Pt(III) complexes.

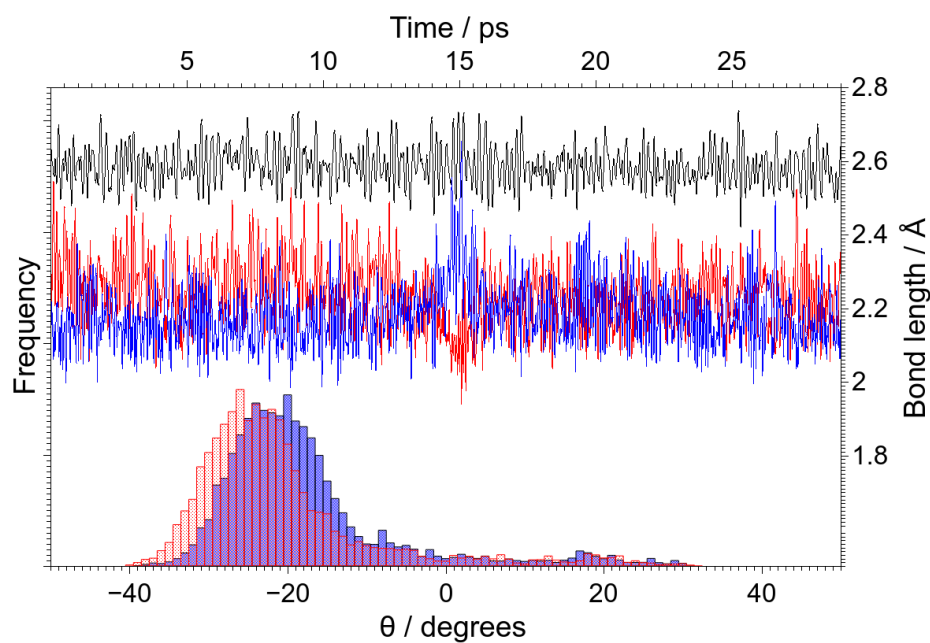

**Figure S8:** Geometrical data for the HH diaquo complex: Evolution of Pt-Pt (black line), Pt<sub>1</sub>-L<sub>1</sub> (red line) and Pt<sub>2</sub>-L<sub>2</sub> (blue line) bonds during the CPMD simulation, along with the O<sub>12</sub>-Pt<sub>2</sub>-Pt<sub>1</sub>-N<sub>31</sub> (blue histogram) and O<sub>22</sub>-Pt<sub>2</sub>-Pt<sub>1</sub>-N<sub>41</sub> (red histogram) dihedral angles distribution. Atoms are labeled in Figure S1.

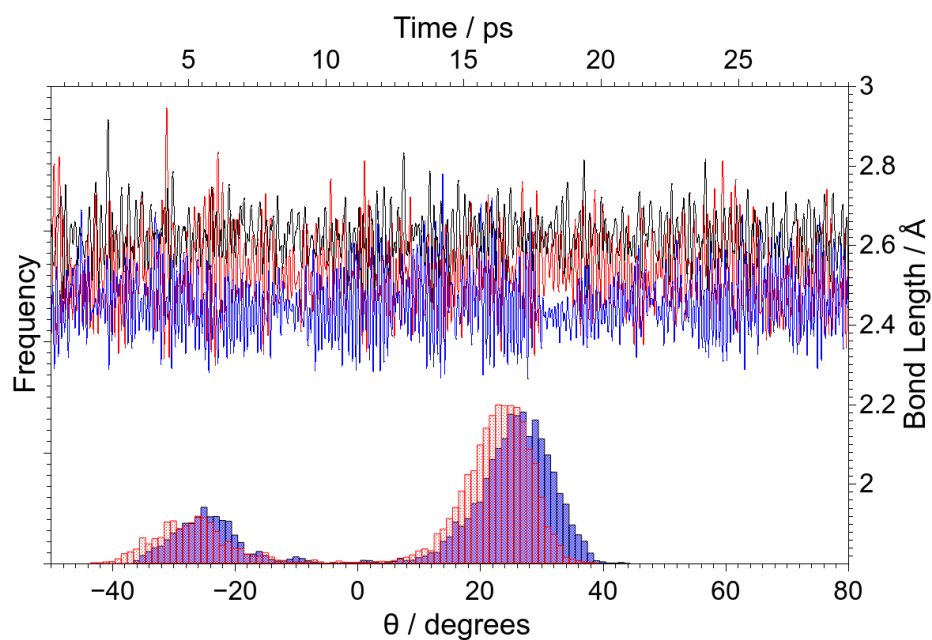

**Figure S9:** Geometrical data for the HH dichloro complex: Evolution of Pt–Pt (black line), Pt<sub>1</sub>–L<sub>1</sub> (red line) and Pt<sub>2</sub>–L<sub>2</sub> (blue line) bonds during the CPMD simulation, along with the O<sub>12</sub>–Pt<sub>2</sub>–Pt<sub>1</sub>–N<sub>31</sub> (blue histogram) and O<sub>22</sub>–Pt<sub>2</sub>–Pt<sub>1</sub>–N<sub>41</sub> (red histogram) dihedral angles distribution. Atoms are labeled in Figure S1.

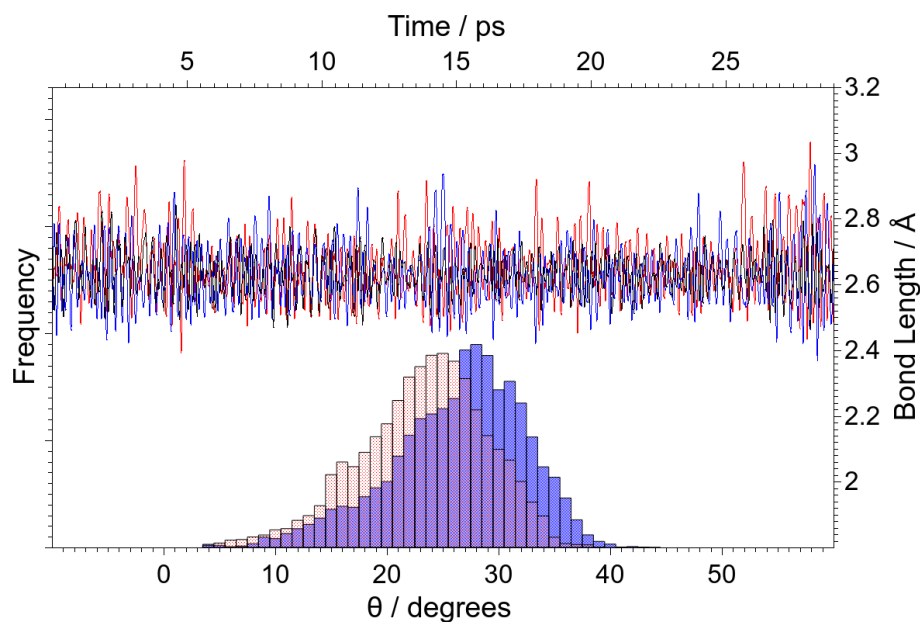

**Figure S10:** Geometrical data for the HH dibromo complex: Evolution of Pt–Pt (black line), Pt<sub>1</sub>–L<sub>1</sub> (red line) and Pt<sub>2</sub>–L<sub>2</sub> (blue line) bonds during the CPMD simulation, along with the O<sub>12</sub>–Pt<sub>2</sub>–Pt<sub>1</sub>–N<sub>31</sub> (blue histogram) and O<sub>22</sub>–Pt<sub>2</sub>–Pt<sub>1</sub>–N<sub>41</sub> (red histogram) dihedral angles distribution. Atoms are labeled in Figure S1.

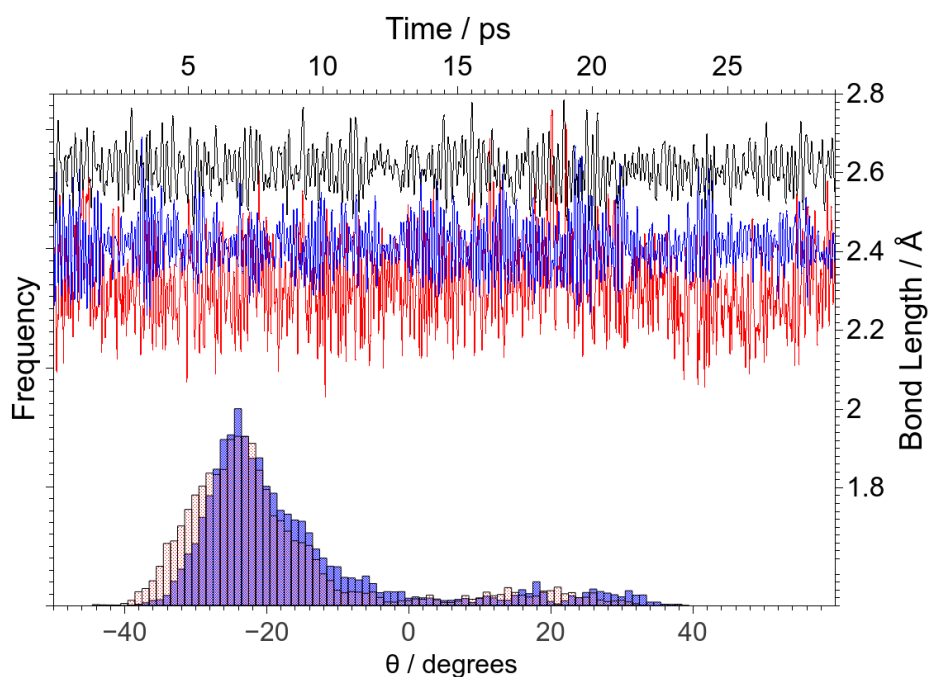

**Figure S11:** Geometrical data for the HH aquachloro complex: Evolution of Pt-Pt (black line), Pt<sub>1</sub>-L<sub>1</sub> (red line) and Pt<sub>2</sub>-L<sub>2</sub> (blue line) bonds during the CPMD simulation, along with the O<sub>12</sub>-Pt<sub>2</sub>-Pt<sub>1</sub>-N<sub>31</sub> (blue histogram) and O<sub>22</sub>-Pt<sub>2</sub>-Pt<sub>1</sub>-N<sub>41</sub> (red histogram) dihedral angles distribution. Atoms are labeled in Figure S1.

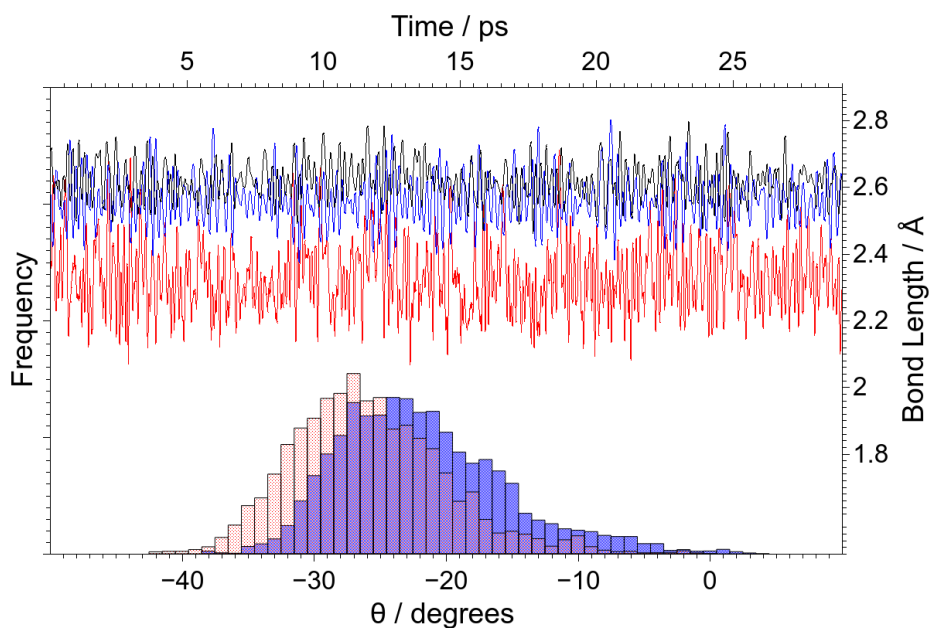

**Figure S12:** Geometrical data for the HH aquabromo complex: Evolution of Pt-Pt (black line), Pt<sub>1</sub>-L<sub>1</sub> (red line) and Pt<sub>2</sub>-L<sub>2</sub> (blue line) bonds during the CPMD simulation, along with the O<sub>12</sub>-Pt<sub>2</sub>-Pt<sub>1</sub>-N<sub>31</sub> (blue histogram) and O<sub>22</sub>-Pt<sub>2</sub>-Pt<sub>1</sub>-N<sub>41</sub> (red histogram) dihedral angles distribution. Atoms are labeled in Figure S1.

**Table S2:** Selected calculated bond lengths (R) in angstrom, angle (A), and dihedral angles (D) in degrees for complexes **1-5** Head-Head (HH).

| Complex 1           |           |           |            |               |               |                    |                    |                    |                    |  |
|---------------------|-----------|-----------|------------|---------------|---------------|--------------------|--------------------|--------------------|--------------------|--|
|                     | R(Pt1-O)  | R(Pt2-O)  | R(Pt1-Pt2) | A(Pt1-Pt2-O)  | A(Pt2-Pt1-O)  | D(N12-Pt2-Pt1-N11) | D(N22-Pt2-Pt1-N21) | D(O12-Pt2-Pt1-N31) | D(O22-Pt2-Pt1-N41) |  |
| Unsolv <sup>a</sup> | 2.192     | 2.122     | 2.540      | 171.68        | 169.27        | 20.45              | 24.97              | 23.07              | 23.94              |  |
| COSMO <sup>b</sup>  | 2.358     | 2.159     | 2.631      | 164.82        | 174.92        | 31.59              | 33.56              | 33.02              | 30.28              |  |
| CPMD <sup>c</sup>   | 2.244     | 2.180     | 2.594      | 168.37        | 173.05        | -20.47             | -20.47             | -18.96             | -21.90             |  |
| Exptl <sup>d</sup>  | —         | 2.122     | 2.540      | 171.68        | —             | -20.45             | -24.97             | -23.94             | -23.07             |  |
| Complex 2           |           |           |            |               |               |                    |                    |                    |                    |  |
|                     | R(Pt1-Br) | R(Pt2-Br) | R(Pt1-Pt2) | A(Pt1-Pt2-Br) | A(Pt2-Pt1-Br) | D(N12-Pt2-Pt1-N11) | D(N22-Pt2-Pt1-N21) | D(O12-Pt2-Pt1-N31) | D(O22-Pt2-Pt1-N41) |  |
| Unsolv <sup>a</sup> | 2.613     | 2.542     | 2.663      | 169.36        | 176.30        | 27.93              | 32.94              | 34.30              | 26.67              |  |
| COSMO <sup>b</sup>  | 2.628     | 2.574     | 2.606      | 170.86        | 178.09        | 26.02              | 28.13              | 28.98              | 25.45              |  |
| CPMD <sup>c</sup>   | 2.655     | 2.631     | 2.635      | 168.60        | 174.30        | 28.10              | 25.89              | 23.30              | 26.55              |  |
| Exptl               | —         | —         | 2.582      | —             | —             | —                  | —                  | —                  | —                  |  |
| Complex 3           |           |           |            |               |               |                    |                    |                    |                    |  |
|                     | R(Pt1-Cl) | R(Pt2-Cl) | R(Pt1-Pt2) | A(Pt1-Pt2-Cl) | A(Pt2-Pt1-Cl) | D(N12-Pt2-Pt1-N11) | D(N22-Pt2-Pt1-N21) | D(O12-Pt2-Pt1-N31) | D(O22-Pt2-Pt1-N41) |  |
| Unsolv <sup>a</sup> | 2.462     | 2.392     | 2.645      | 170.24        | 176.51        | 26.83              | 32.03              | 33.17              | 25.81              |  |
| COSMO <sup>b</sup>  | 2.478     | 2.428     | 2.592      | 171.62        | 178.12        | 24.62              | 27.25              | 27.59              | 24.48              |  |
| CPMD <sup>c</sup>   | 2.539     | 2.444     | 2.616      | 168.25        | 173.63        | 27.61              | 26.46              | 25.76              | 25.96              |  |
| Exptl               | —         | —         | 2.568      | —             | —             | —                  | —                  | —                  | —                  |  |
| Complex 4           |           |           |            |               |               |                    |                    |                    |                    |  |
|                     | R(Pt1-O)  | R(Pt2-Br) | R(Pt1-Pt2) | A(Pt1-Pt2-Br) | A(Pt2-Pt1-O)  | D(N12-Pt2-Pt1-N11) | D(N22-Pt2-Pt1-N21) | D(O12-Pt2-Pt1-N31) | D(O22-Pt2-Pt1-N41) |  |
| Unsolv <sup>a</sup> | 2.573     | 2.539     | 2.690      | 163.31        | 168.96        | -31.65             | -24.02             | -22.97             | -34.23             |  |
| COSMO <sup>b</sup>  | 2.416     | 2.485     | 2.604      | 170.92        | 176.28        | -26.05             | -26.84             | -26.67             | -25.59             |  |
| CPMD <sup>c</sup>   | 2.320     | 2.565     | 2.613      | 168.48        | 172.24        | -23.71             | -25.45             | -25.78             | -21.52             |  |
| Exptl               | —         | —         | —          | —             | —             | —                  | —                  | —                  | —                  |  |
| Complex 5           |           |           |            |               |               |                    |                    |                    |                    |  |
|                     | R(Pt1-O)  | R(Pt2-Cl) | R(Pt1-Pt2) | A(Pt1-Pt2-Cl) | A(Pt2-Pt1-O)  | D(N12-Pt2-Pt1-N11) | D(N22-Pt2-Pt1-N21) | D(O12-Pt2-Pt1-N31) | D(O22-Pt2-Pt1-N41) |  |
| Unsolv <sup>a</sup> | 2.548     | 2.311     | 2.690      | 164.04        | 169.65        | -31.65             | -24.02             | -22.97             | -34.23             |  |
| COSMO <sup>b</sup>  | 2.384     | 2.347     | 2.589      | 171.44        | 176.34        | -26.02             | -26.84             | -27.56             | -26.53             |  |
| CPMD <sup>c</sup>   | 2.309     | 2.427     | 2.594      | 169.71        | 172.54        | -21.36             | -23.65             | -22.32             | -19.42             |  |
| Exptl               | —         | —         | —          | —             | —             | —                  | —                  | —                  | —                  |  |

<sup>a</sup> Using one scalar relativistically optimized geometry, no solvent. <sup>b</sup> Using one scalar relativistically optimized geometry with COSMO solvation. <sup>c</sup> Average on 64 CPMD configurations plus 64 explicit solvent molecules. <sup>d</sup> Data from  $[\text{Pt}_2(\text{NH}_3)_4(\text{C}_3\text{H}_4\text{NO}_2)(\text{H}_2\text{O})(\text{NO}_3)](\text{NO}_3)_3 \cdot 2 \text{H}_2\text{O}$  X-ray data. <sup>e</sup> Atoms are labeled in Figure S1.



**Table S3:** Selected calculated bond lengths (R) in angstrom, angle (A), and dihedral angles (D) in degrees for complexes **1-5** Head-Tail (HT).

| Complex 1           |           |           |            |               |               |                    |                    |                    |                    |  |
|---------------------|-----------|-----------|------------|---------------|---------------|--------------------|--------------------|--------------------|--------------------|--|
|                     | R(Pt1-O)  | R(Pt2-O)  | R(Pt1-Pt2) | A(Pt1-Pt2-O)  | A(Pt2-Pt1-O)  | D(N12-Pt2-Pt1-N11) | D(N22-Pt2-Pt1-N21) | D(N32-Pt2-Pt1-O11) | D(O12-Pt2-Pt1-N31) |  |
| Unsolv <sup>a</sup> | 2.240     | 2.230     | 2.610      | 164.30        | 164.40        | -26.70             | -26.80             | -24.30             | -24.40             |  |
| COSMO <sup>b</sup>  | 2.170     | 2.180     | 2.540      | 170.70        | 169.50        | -26.70             | -25.60             | -23.70             | -23.30             |  |
| CPMD <sup>c</sup>   | 2.190     | 2.048     | 2.580      | 169.88        | 170.17        | -25.13             | -24.93             | -21.42             | -21.71             |  |
| Exptl <sup>d</sup>  | —         | —         | —          | —             | —             | —                  | —                  | —                  | —                  |  |
| Complex 2           |           |           |            |               |               |                    |                    |                    |                    |  |
|                     | R(Pt1-Br) | R(Pt2-Br) | R(Pt1-Pt2) | A(Pt1-Pt2-Br) | A(Pt2-Pt1-Br) | D(N12-Pt2-Pt1-N11) | D(N22-Pt2-Pt1-N21) | D(N32-Pt2-Pt1-O11) | D(O12-Pt2-Pt1-N31) |  |
| Unsolv <sup>a</sup> | 2.590     | 2.590     | 2.660      | 175.40        | 175.10        | 21.50              | 21.70              | 18.50              | 18.50              |  |
| COSMO <sup>b</sup>  | 2.600     | 2.600     | 2.610      | 173.50        | 173.30        | 25.50              | 25.40              | 24.00              | 24.00              |  |
| CPMD <sup>c</sup>   | 2.649     | 2.645     | 2.647      | 172.14        | 171.58        | 23.25              | 23.02              | 21.22              | 21.42              |  |
| Exptl <sup>d</sup>  | 2.573     | 2.562     | 2.582      | 171.95        | 171.04        | 30.20              | 29.81              | 26.48              | 25.84              |  |
| Complex 3           |           |           |            |               |               |                    |                    |                    |                    |  |
|                     | R(Pt1-Cl) | R(Pt2-Cl) | R(Pt1-Pt2) | A(Pt1-Pt2-Cl) | A(Pt2-Pt1-Cl) | D(N12-Pt2-Pt1-N11) | D(N22-Pt2-Pt1-N21) | D(N32-Pt2-Pt1-O11) | D(O12-Pt2-Pt1-N31) |  |
| Unsolv <sup>a</sup> | 2.440     | 2.440     | 2.640      | 175.00        | 174.80        | 25.70              | 25.80              | 29.70              | 29.50              |  |
| COSMO <sup>b</sup>  | 2.451     | 2.452     | 2.593      | 174.10        | 174.00        | 24.30              | 24.30              | 22.50              | 22.70              |  |
| CPMD <sup>c</sup>   | 2.513     | 2.495     | 2.619      | 172.00        | 171.92        | 23.19              | 22.23              | 21.54              | 21.90              |  |
| Exptl <sup>d</sup>  | 2.444     | 2.429     | 2.568      | 173.18        | 174.62        | 28.58              | 30.57              | 25.15              | 25.76              |  |
| Complex 4           |           |           |            |               |               |                    |                    |                    |                    |  |
|                     | R(Pt1-Br) | R(Pt2-O)  | R(Pt1-Pt2) | A(Pt1-Pt2-O)  | A(Pt2-Pt1-Br) | D(N12-Pt2-Pt1-N11) | D(N22-Pt2-Pt1-N21) | D(N32-Pt2-Pt1-O11) | D(O12-Pt2-Pt1-N31) |  |
| Unsolv <sup>a</sup> | 2.480     | 2.640     | 2.690      | 164.83        | 171.09        | 23.90              | 25.80              | 22.23              | 21.99              |  |
| COSMO <sup>b</sup>  | 2.515     | 2.321     | 2.590      | 170.56        | 173.11        | 24.95              | 25.95              | 23.54              | 23.57              |  |
| CPMD <sup>c</sup>   | 2.600     | 2.280     | 2.604      | 170.85        | 173.40        | 24.96              | 22.71              | 21.40              | 23.61              |  |
| Exptl               | —         | —         | —          | —             | —             | —                  | —                  | —                  | —                  |  |
| Complex 5           |           |           |            |               |               |                    |                    |                    |                    |  |
|                     | R(Pt1-Cl) | R(Pt2-O)  | R(Pt1-Pt2) | A(Pt1-Pt2-O)  | A(Pt2-Pt1-Cl) | D(N12-Pt2-Pt1-N11) | D(N22-Pt2-Pt1-N21) | D(N32-Pt2-Pt1-O11) | D(O12-Pt2-Pt1-N31) |  |
| Unsolv <sup>a</sup> | 2.325     | 2.578     | 2.668      | 164.45        | 171.97        | 23.40              | 24.55              | 21.39              | 20.71              |  |
| COSMO <sup>b</sup>  | 2.375     | 2.301     | 2.579      | 171.10        | 173.48        | 24.73              | 25.89              | 23.39              | 22.97              |  |
| CPMD <sup>c</sup>   | 2.445     | 2.287     | 2.607      | 169.54        | 173.00        | 26.99              | 25.36              | 24.33              | 24.52              |  |
| Exptl               | —         | —         | —          | —             | —             | —                  | —                  | —                  | —                  |  |

<sup>a</sup> Using one scalar relativistically optimized geometry, no solvent. <sup>b</sup> Using one scalar relativistically optimized geometry with COSMO solvation. <sup>c</sup> Average on 64 CPMD configurations plus 64 explicit solvent molecules. <sup>d</sup> Data from  $[X(NH_3)_2Pt(C_5H_4NO)_2Pt(NH_3)_2X](NO_3)_2 \cdot nH_2O$  ( $X^- = Cl^-, Br^-$ ), X-Ray data.<sup>10</sup> Atoms are labeled in Figure S1.

## 5 Evolution of average

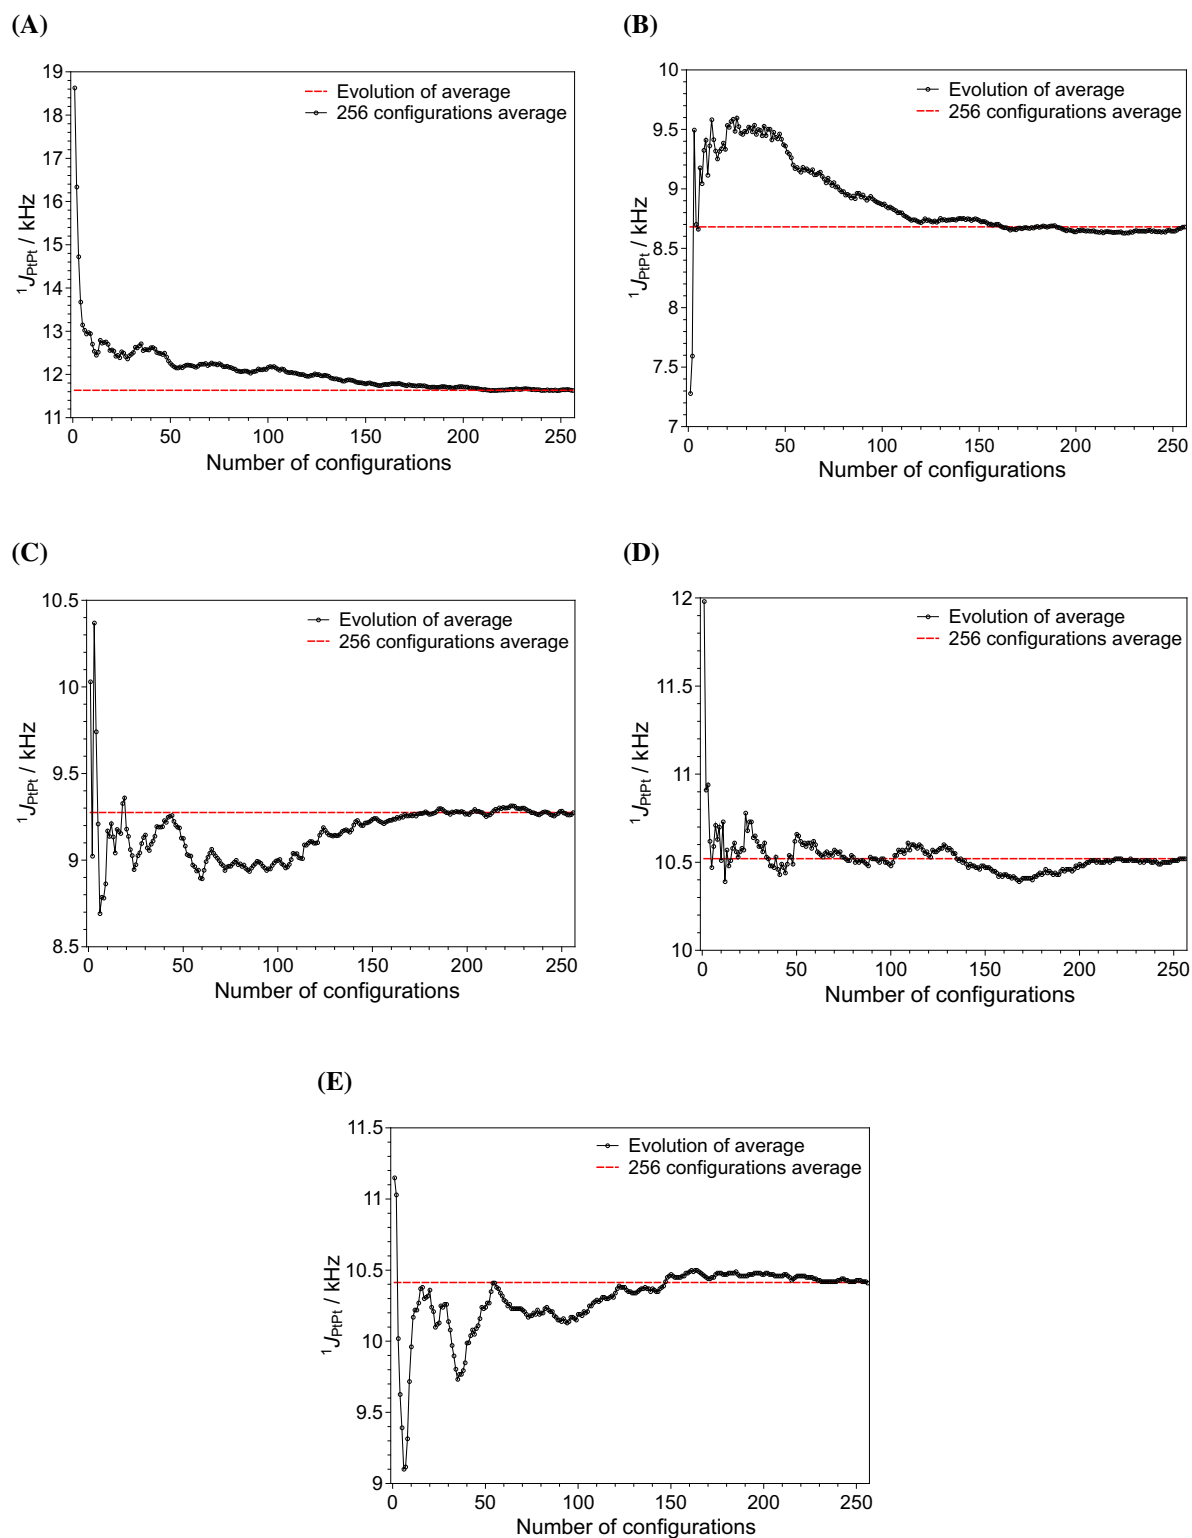

**Figure S13:** Evolution of the average calculated  $^1J_{PtPt}$  for diaquo (A), dibromo (B), dichloro (C), aquabromo (D) and aquachloro (E) complexes using 256 configurations of the production trajectory.

## 6 Relativistic Scalar Correction on the $^1J_{\text{PtPt}}$

Table S4 shows  $^1J_{\text{PtPt}}$  computed using an evenly spaced set of 64 configurations from production trajectory of the HH diaquo complex. In addition, the number of NN solvent molecules were included with increments of five, along with COSMO to treat bulk solvent effects. The bare-solute regime also was considered in order to assess only the thermal effects on the selected configurations. The values in Table S4 was used to plot the graph of the Figure 7 in the main text.

**Table S4:**  $^1J_{\text{PtPt}}$  spin-spin coupling constant<sup>a</sup> dependence on solvated complexes as a functions of the number of explicit water molecules. Each data point involves a sampling of 64 CPMD configurations. The asterisk “solvent molecules” correspond to bare solute from MD-averaged data.  $^1J_{\text{PtPt}}$  calculations were performed at ZORA-SR/PBE0/jcpl level of theory.

| Solvent Count | Complex |       |      |      |      |      |      |      |      |      |
|---------------|---------|-------|------|------|------|------|------|------|------|------|
|               | 1       |       | 2    |      | 3    |      | 4    |      | 5    |      |
|               | HH      | HT    | HH   | HT   | HH   | HT   | HH   | HT   | HH   | HT   |
| <i>*b</i>     | 11856   | 11940 | 4416 | 4638 | 4645 | 4783 | 5888 | 6083 | 5539 | 6308 |
| 0             | 11385   | 10779 | 6547 | 6878 | 6882 | 7084 | 8295 | 8204 | 7088 | 8412 |
| 5             | 9205    | 9169  | 6807 | 7157 | 7210 | 7350 | 8317 | 8034 | 8160 | 8330 |
| 10            | 9191    | 9142  | 6853 | 7218 | 7301 | 7476 | 8443 | 8063 | 8249 | 8398 |
| 15            | 9236    | 9132  | 6927 | 7238 | 7321 | 7542 | 8520 | 8093 | 8301 | 8424 |
| 20            | 9114    | 9094  | 6909 | 7240 | 7304 | 7439 | 8533 | 8074 | 8311 | 8411 |
| 25            | 9005    | 9086  | 6862 | 7211 | 7268 | 7458 | 8362 | 8047 | 8271 | 8399 |

<sup>a</sup>All values are given in Hz. <sup>b</sup>Average results from 256 configurations of CPMD trajectories including spin-orbit corrections, plus specified number of explicit solvent molecules and implicit solvation (COSMO) to model bulk effect.

## 7 PBE Functional with CPMD Configurations

Tables S5 and S6 show the  $^1J_{\text{PtPt}}$  and the  $^{195}\text{Pt}$  chemical shifts, respectively, computed at ZORA-SO/PBE/jcpl level of theory using CPMD configurations. The  $^1J_{\text{PtPt}}$  average value decreases about 1 kHz for diaquo complex, and 530 Hz for dihalo and aquahalo complexes. For chemical shifts no significantly improvement was observed in comparison with the values calculated at ZORA-SO/PBE0/jcpl.

### 7.1 Spin-Spin Coupling Constant - $^1J_{\text{PtPt}}$

**Table S5:** Calculated  $^1J_{\text{PtPt}}$  spin-spin coupling constants<sup>a</sup> for complexes 1-5 Head-to-Head (HH) with different solvation and unsolvation models.  $^1J_{\text{PtPt}}$  calculations were performed at ZORA-SO/PBE/TZP(jcpl) level of theory. The values in square brackets are the relative error regarding the experimental data.<sup>b</sup>

| Complex         | Unsolvated <sup>c</sup> | COSMO <sup>d</sup> | CPMD-Bare <sup>e</sup> | CPMD <sup>f</sup> | Exptl <sup>g</sup> |
|-----------------|-------------------------|--------------------|------------------------|-------------------|--------------------|
| 1 <sup>HH</sup> | 11920 [34]              | 13918 [57]         | 13812 [55]             | 10617 [19]        | 8886               |
| 2 <sup>HH</sup> | 6139 [-3]               | 7589 [20]          | 5738 [-9]              | 8201 [30]         | 6306               |
| 3 <sup>HH</sup> | 6182 [-7]               | 8051 [21]          | 6061 [-9]              | 8679 [31]         | 6636               |
| 4 <sup>HH</sup> | 6545 [-14]              | 8051 [6]           | 7605 [4]               | 10002 [32]        | 7574               |
| 5 <sup>HH</sup> | 6737 [-11]              | 10002 [29]         | 7663 [-1]              | 9879 [27]         | 7774               |

<sup>a</sup>All values are given in Hz. <sup>b</sup>All values are given in %. <sup>c</sup>Relativistic couplings from relativistically optimized geometry unsolvated. <sup>d</sup>Relativistic couplings from relativistically optimized geometry with implicit solvation. <sup>e</sup>Average on 64 CPMD configurations, wherein all solvent molecules were stripped. <sup>f</sup>Average on 256 CPMD configurations plus specified number of explicit nearest neighboring solvent molecules and implicit solvation to model bulk effect. Values in parenthesis are average on 64 CPMD configurations. <sup>g</sup>Measurements using an acidic D<sub>2</sub>O solution (DClO<sub>4</sub>/D<sub>2</sub>O) to suppress deprotonation of the diaqua complexes. Data extracted of Iwatsuki and coworkers.<sup>11</sup>

## 7.2 Chemical Shift - $\delta^{195}\text{Pt}$

**Table S6:** Calculated  $\delta^{195}\text{Pt}$  chemical shift<sup>a</sup> for complexes **1** to **5** Head-to-Head (HH) with different solvation and unsolvation models at ZORA-SO/PBE/jcpl level of theory. The values in square brackets are the absolute deviation relative to experiment data.<sup>a</sup>

| Complex                              | Atom                               | Unsolvated <sup>b</sup> | COSMO <sup>c</sup> | CPMD <sup>d</sup> | Exptl <sup>e</sup> |
|--------------------------------------|------------------------------------|-------------------------|--------------------|-------------------|--------------------|
| 1                                    | Pt[N <sub>4</sub> ]                | -844                    | -844               | -844              | -844               |
|                                      | Pt[N <sub>2</sub> O <sub>2</sub> ] | 393                     | 393                | 393               | 393                |
| 2                                    | Pt[N <sub>4</sub> ]                | -1338 [350]             | -1759 [771]        | -929 [59]         | -988               |
|                                      | Pt[N <sub>2</sub> O <sub>2</sub> ] | -1332 [1300]            | -1008 [976]        | 32 [64]           | -32                |
| 3                                    | Pt[N <sub>4</sub> ]                | -1120 [172]             | -1716 [768]        | -795 [153]        | -948               |
|                                      | Pt[N <sub>2</sub> O <sub>2</sub> ] | -1296 [1425]            | -834 [963]         | 67 [62]           | 129                |
| 4                                    | Pt[N <sub>4</sub> ]                | -1346 [45]              | -1193 [198]        | -311 [1080]       | -1391              |
|                                      | Pt[N <sub>2</sub> O <sub>2</sub> ] | -1197 [1840]            | -1475 [2118]       | -465 [1108]       | 643                |
| 5                                    | Pt[N <sub>4</sub> ]                | -1229 [35]              | -1426 [232]        | -567 [627]        | -1194              |
|                                      | Pt[N <sub>2</sub> O <sub>2</sub> ] | -820 [1338]             | -1132 [1650]       | -129 [647]        | 518                |
| Mean absolute deviation <sup>a</sup> |                                    | 813                     | 959                | 475               |                    |

<sup>a</sup>All values are given in ppm and spin-orbit corrections are included for all calculations. <sup>b</sup>Relativistic chemical shifts from relativistically optimized geometry unsolvated. <sup>c</sup>Relativistic chemical shifts from relativistically optimized geometry with implicit solvation. <sup>d</sup>Average on 256 CPMD configurations plus 10 explicit nearest neighboring solvent molecules and implicit solvation to model bulk effect. <sup>e</sup>Data extracted of Iwatsuki and coworkers.<sup>11</sup>

## 8 Assessment of DFT Functional

The level of theory for the complexes study was chosen based on molecular dynamics in solution works, as well as on NMR parameter calculations. The functional GGA of acronym PBE, presented good results with acceptable computational cost, when applied in molecular dynamics simulations.<sup>1,12,13</sup> The hybrid functional of acronym PBE0, on the other hand, showed good results for coupling constants calculations.<sup>12,14</sup> In addition, an assessment was carried out in order to check the functional and geometries effects on the  $^1J_{\text{PtPt}}$  calculations. Table S7 gathers the results of  $^1J_{\text{PtPt}}$  calculated with geometries of the complexes **1-5**, optimized at different level of theory with and without implicit solvation (COSMO). The values in square brackets correspond to the relative error with respect to experimental  $J$ -coupling and PtPt bond length data.

The diaquo complex (**1**) was the one that present the worst results and a dramatic dependence of the functional and geometry. The three level of theory overestimate the  $^1J_{\text{PtPt}}$  values even upon solvation, being the PBE level in unsolvated model with the lowest error (34%). For dihalo complexes, the  $^1J_{\text{PtPt}}$  is overestimate in the three levels of the unsolvated model. For dibromo complex (**2**), the PBE0/PBE and PBE present almost the same results, with lowest error (3%), while for dichloro complex (**3**) the level of theory that yield the better result is the PBE without solvation and, the PBE0/PBE and PBE0 levels are very similar. In the COSMO model the better result is obtained with the PBE level of theory for both complexes, even though the values are overestimate by 20% and 21%, respectively. The aquahalo complexes (**4** and **5**) in unsolvated model have the majority results underestimate with the three levels. However, the PBE0 level proves to be the better for both complexes, with errors of -3% and 1% for complex **4** and **5**, respectively. In the COSMO model, the PBE0/PBE level overestimates the results, but is the better for complex **5**, and the PBE is the better for complex **4**, overestimating the  $^1J_{\text{PtPt}}$  by 6%.

The Pt–Pt bond lengths show poor agreement with the three level of theory analyzed, overestimating the experimental values by  $\sim 200$  pm. However, these results are not surprising, since the experimental data were obtained by X-ray diffraction in solid state (see footnote of Table S7), i.e., the lengths of the experimental chemical bonds tend to be shorter in the crystalline structure. Thus, Pt–Pt bonds show to be longer in unsolvated calculations when compared to those obtained using COSMO, which suggest that the inclusion of the solvent effect may compress the complex structures.

In general, in unsolvated model, the three levels underestimated the  $^1J_{\text{PtPt}}$  values of the complexes containing halides and overestimated the results for diaquo complex. Despite this, the  $^1J_{\text{PtPt}}$  calculations at PBE level show the better results for diaquo and dihalo complexes. For aquahalo complexes, the better results are obtained with the PBE0 level. On the other hand, in the COSMO model, all  $^1J_{\text{PtPt}}$  values are overestimated. However, for dihalo complexes, the three levels present very similar errors, as well as the PBE and PBE0/PBE have almost equal errors for aquahalo complexes.

Therefore, in order to better assess the accuracy of one functional for the five complexes, the mean relative error (MRE) of unsolvated and COSMO models were calculated. Thus, the PBE0/PBE level has the lowest MRE for unsolvated calculations, 1%, while the PBE and PBE0 levels show MREs of 8% and

20%. For COSMO model, the PBE level has the lowest MRE, 27% and, for PBE0/PBE and PBE0 levels, the MREs are 32% and 47%. Despite PBE present a MRE somewhat lower than PBE0/PBE, the PBE0 hybrid functional has 25% of exact exchange which reduces the self-interaction error.<sup>15,16</sup> In this sense, the PBE0/PBE is the best choice to avoid minimum approaches and provide more reliable calculated results in solvated model. These results indicate that the geometry is better described with GGA functional and the hybrid functional is the better choice for properties calculations.

**Table S7:**  $^1J_{\text{PtPt}}$  (Hz) and Pt–Pt bond lengths (Å) calculated using static geometries of the Head-to-Head complexes **1-5** with different level of theory with and without implicit solvation via COSMO. Value in square brackets are the relative error (%) regarding the experimental data (Exptl).

| Complex | Level of Theory* | Unsolv.     | R(Pt-Pt) | COSMO       | R(Pt-Pt) | Exptl               |                    |
|---------|------------------|-------------|----------|-------------|----------|---------------------|--------------------|
|         |                  |             |          |             |          | $^1J_{\text{PtPt}}$ | R[PtPt]            |
| 1       | PBE              | 11920 [34]  | 2.684    | 13918 [57]  | 2.581    |                     |                    |
|         | PBE0/PBE         | 13841 [56]  | 2.684    | 15439 [74]  | 2.581    | 8886                | 2.540 <sup>a</sup> |
|         | PBE0             | 19971 [125] | 2.540    | 18843 [112] | 2.631    |                     |                    |
| 2       | PBE              | 6139 [-3]   | 2.717    | 7589 [20]   | 2.648    |                     |                    |
|         | PBE0/PBE         | 6113 [-3]   | 2.717    | 7881 [25]   | 2.648    | 6306                | 2.582 <sup>a</sup> |
|         | PBE0             | 5578 [-12]  | 2.663    | 7921 [26]   | 2.606    |                     |                    |
| 3       | PBE              | 6182 [-7]   | 2.671    | 8051 [21]   | 2.631    |                     |                    |
|         | PBE0/PBE         | 5854 [-12]  | 2.671    | 8397 [27]   | 2.631    | 6636                | 2.568 <sup>a</sup> |
|         | PBE0             | 5922 [-11]  | 2.645    | 8285 [25]   | 2.592    |                     |                    |
| 4       | PBE              | 6545 [-14]  | 2.746    | 8051 [6]    | 2.626    |                     |                    |
|         | PBE0/PBE         | 6034 [-20]  | 2.746    | 8087 [7]    | 2.626    | 7574                | 2.561 <sup>b</sup> |
|         | PBE0             | 7358 [-3]   | 2.690    | 9694 [28]   | 2.604    |                     |                    |
| 5       | PBE              | 6737 [-11]  | 2.728    | 10002 [29]  | 2.624    |                     |                    |
|         | PBE0/PBE         | 6333 [-16]  | 2.728    | 10017 [29]  | 2.624    | 7774                | 2.554 <sup>b</sup> |
|         | PBE0             | 7649 [1]    | 2.690    | 10752 [42]  | 2.589    |                     |                    |
| MRE**   | PBE              | 8           | 6        | 27          | 2        |                     |                    |
|         | PBE0/PBE         | 1           | 6        | 32          | 2        | —                   | —                  |
|         | PBE0             | 20          | 3        | 47          | 2        |                     |                    |

\*PBE = Geometry optimized at ZORA-SR/PBE/TZP and  $^1J_{\text{PtPt}}$  calculated at ZORA-SO/PBE/jcpl; PBE0/PBE =  $^1J_{\text{PtPt}}$  calculated at ZORA-SO/PBE0/jcpl using optimized geometries at ZORA-SR/PBE/TZP; PBE0 = Geometry optimized at ZORA-SR/PBE0/TZP and  $^1J_{\text{PtPt}}$  calculated at ZORA-SO/PBE0/jcpl. \*\*Mean Relative Error in %.

<sup>a</sup>Bond lengths from X-Ray diffraction<sup>9</sup> of  $[\text{Pt}_2(\text{NH}_3)_4(\text{C}_5\text{H}_4\text{NO})_2(\text{H}_2\text{O})(\text{NO}_3)](\text{NO}_3)_3 \cdot 2\text{H}_2\text{O}$ ; <sup>b</sup>Average values between the diaquo and the respective aquahalo complex. Data estimated for use as a reference only, since the aquahalo complexes do not have experimental data.

In the same way, for chemical shifts the PBE0/PBE level present the lowest MRE for the two platinum atoms in both models evaluated. However, in the unsolvated model the shifts values are overestimate (23% for Pt[N<sub>4</sub>] and 174% for Pt[N<sub>2</sub>O<sub>2</sub>]), while in the COSMO model the shifts values are underestimate

with a smaller MRE (-23% for Pt[N<sub>4</sub>] and -18% for Pt[N<sub>2</sub>O<sub>2</sub>]). The PBE and PBE0 levels yield larger MREs with greater difference between the two platinum atoms. These results are give in Table S8.

**Table S8:** Calculated <sup>195</sup>Pt chemical shift<sup>a</sup> for complexes **1** to **5** Head-to-Head (HH) with different level of theory with and without implicit solvation via COSMO. The values in square brackets are the relative error regarding the experimental data.<sup>b</sup>

| Complex | Level of Theory* | Unsolv.               |                                      | COSMO                 |                                      | Exptl                 |                                      |
|---------|------------------|-----------------------|--------------------------------------|-----------------------|--------------------------------------|-----------------------|--------------------------------------|
|         |                  | Pt[PtN <sub>4</sub> ] | Pt[PtN <sub>2</sub> O <sub>2</sub> ] | Pt[PtN <sub>4</sub> ] | Pt[PtN <sub>2</sub> O <sub>2</sub> ] | Pt[PtN <sub>4</sub> ] | Pt[PtN <sub>2</sub> O <sub>2</sub> ] |
| 1       | PBE              | -844                  | 393                                  | -844                  | 393                                  |                       |                                      |
|         | PBE0/PBE         | -844                  | 393                                  | -844                  | 393                                  | -844                  | 393                                  |
|         | PBE0             | -844                  | 393                                  | -844                  | 393                                  |                       |                                      |
| 2       | PBE              | -1540 [56]            | -553 [1630]                          | -1003 [1]             | -101 [214]                           |                       |                                      |
|         | PBE0/PBE         | -1521 [54]            | -508 [1487]                          | -925 [10]             | -115 [259]                           | -988                  | -32                                  |
|         | PBE0             | -891 [-10]            | -1164 [3538]                         | -1767 [79]            | -1085 [3291]                         |                       |                                      |
| 3       | PBE              | -1722 [82]            | -509 [-494]                          | -959 [1]              | 95 [-26]                             |                       |                                      |
|         | PBE0/PBE         | -1748 [84]            | -444 [-444]                          | -890 [10]             | 82 [-37]                             | -948                  | 129                                  |
|         | PBE0             | -654 [-31]            | -1123 [-971]                         | -1730 [82]            | -909 [-805]                          |                       |                                      |
| 4       | PBE              | -926 [-33]            | -833 [-230]                          | -517 [-63]            | -444 [-169]                          |                       |                                      |
|         | PBE0/PBE         | -964 [-31]            | -684 [-206]                          | -456 [-52]            | -456 [-171]                          | -1391                 | 643                                  |
|         | PBE0             | -1322 [-5]            | -518 [-181]                          | -1294 [-7]            | -1446 [-325]                         |                       |                                      |
| 5       | PBE              | -1008 [-16]           | -351 [-168]                          | -543 [-54]            | -180 [-135]                          |                       |                                      |
|         | PBE0/PBE         | -1027 [-14]           | -215 [-141]                          | -550 [-60]            | -109 [-121]                          | -1194                 | 518                                  |
|         | PBE0             | -527 [-56]            | -855 [-265]                          | -1476 [24]            | -1121 [-316]                         |                       |                                      |
| MRE**   | PBE              | 22                    | 184                                  | -29                   | -29                                  |                       |                                      |
|         | PBE0/PBE         | 23                    | 174                                  | -23                   | -18                                  | —                     | —                                    |
|         | PBE0             | -26                   | 530                                  | 44                    | 461                                  |                       |                                      |

\*PBE = Geometry optimized at ZORA-SR/PBE/TZP and  $\delta^{195}\text{Pt}$  calculated at ZORA-SO/PBE/jcpl; PBE0/PBE =  $\delta^{195}\text{Pt}$  calculated at ZORA-SO/PBE0/jcpl using optimized geometries at ZORA-SR/PBE/TZP; PBE0 = Geometry optimized at ZORA-SR/PBE0/TZP and  $\delta^{195}\text{Pt}$  calculated at ZORA-SO/PBE0/jcpl;  $\delta^{195}\text{Pt}$  calculated as  $\delta_{\text{calc}} = \sigma_{\text{ref}} - \sigma_{\text{probe}} + \delta_{\text{ref}}^{\text{exptl}}$  where the complex **1<sup>HH</sup>** is used as internal reference. \*\*Mean Relative Error in %. <sup>a</sup>All values are given in ppm and spin-orbit corrections are included for all calculations. <sup>b</sup>All values are given in %. <sup>c</sup>Data extracted of Iwatsuki and coworkers.<sup>11</sup>



## 9 *J*-coupling analysis

### 9.1 Natural Localized Molecular Orbitals

Figure S14 shows the natural localized molecular orbitals of the  $L_1$ -Pt[ $N_4$ ] and  $L_2$ -Pt[ $N_2O_2$ ] bonds, which contribute to spin-spin Pt-Pt coupling constant.

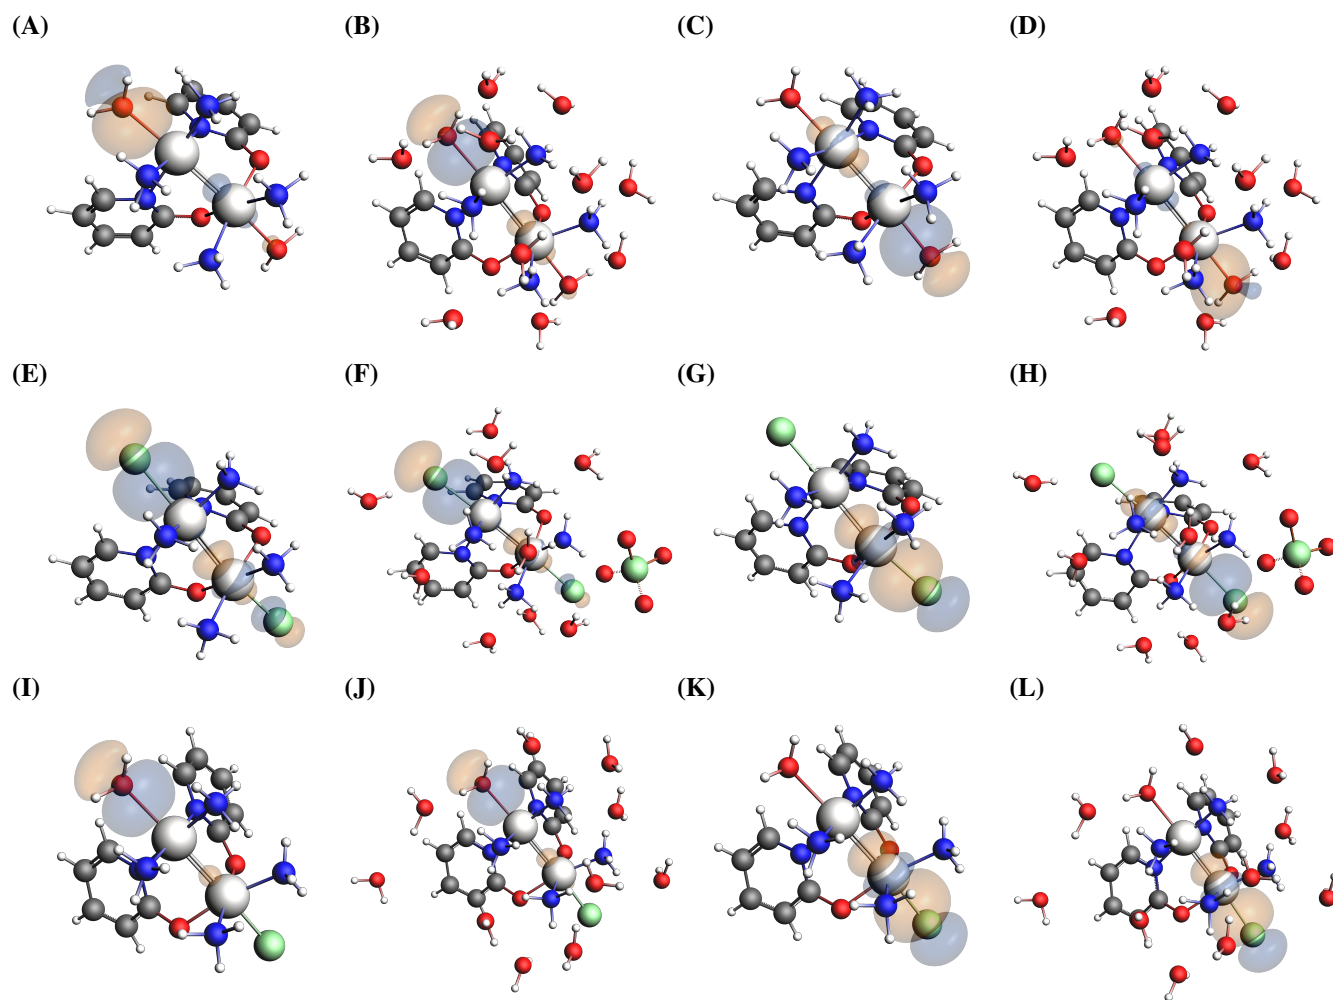

**Figure S14:** Snapshots from the production trajectory of HH diaquo (A to D), dichloro (E to H) and aquachloro (I to L) complexes showing the  $L_1$ -Pt[ $N_4$ ] and  $L_2$ -Pt[ $N_2O_2$ ] bonding NLMOs in the CPMD-Bare and CPMD models. Such snapshots were chosen because they represent more faithfully the average value obtained in each evaluated solvation model. Isosurface values: 0.03 au.

## 9.2 Canonical Molecular Orbitals

Figures S15-S17 show the main canonical molecular orbitals which contribute to spin-spin Pt–Pt coupling constant.

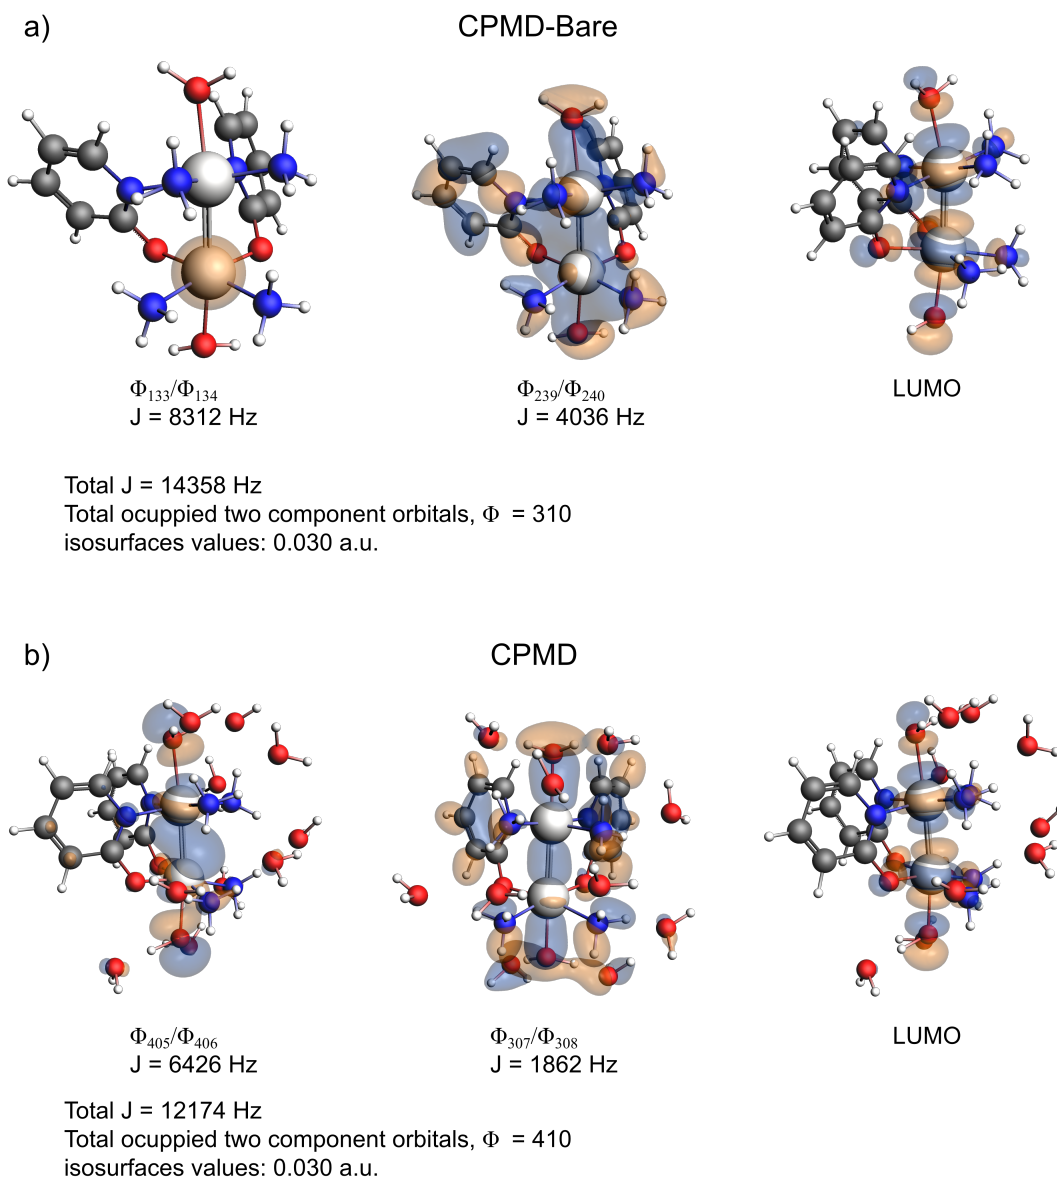

**Figure S15:** Plots of scalar ZORA canonical molecular orbitals (CMOs) with the main contributions to reduced spin-spin coupling for diaquo complex (**1<sup>HH</sup>**) in the CPMD-Bare model (a) and CPMD model (b). Listed contributions are for spin-orbit ZORA CMOs.

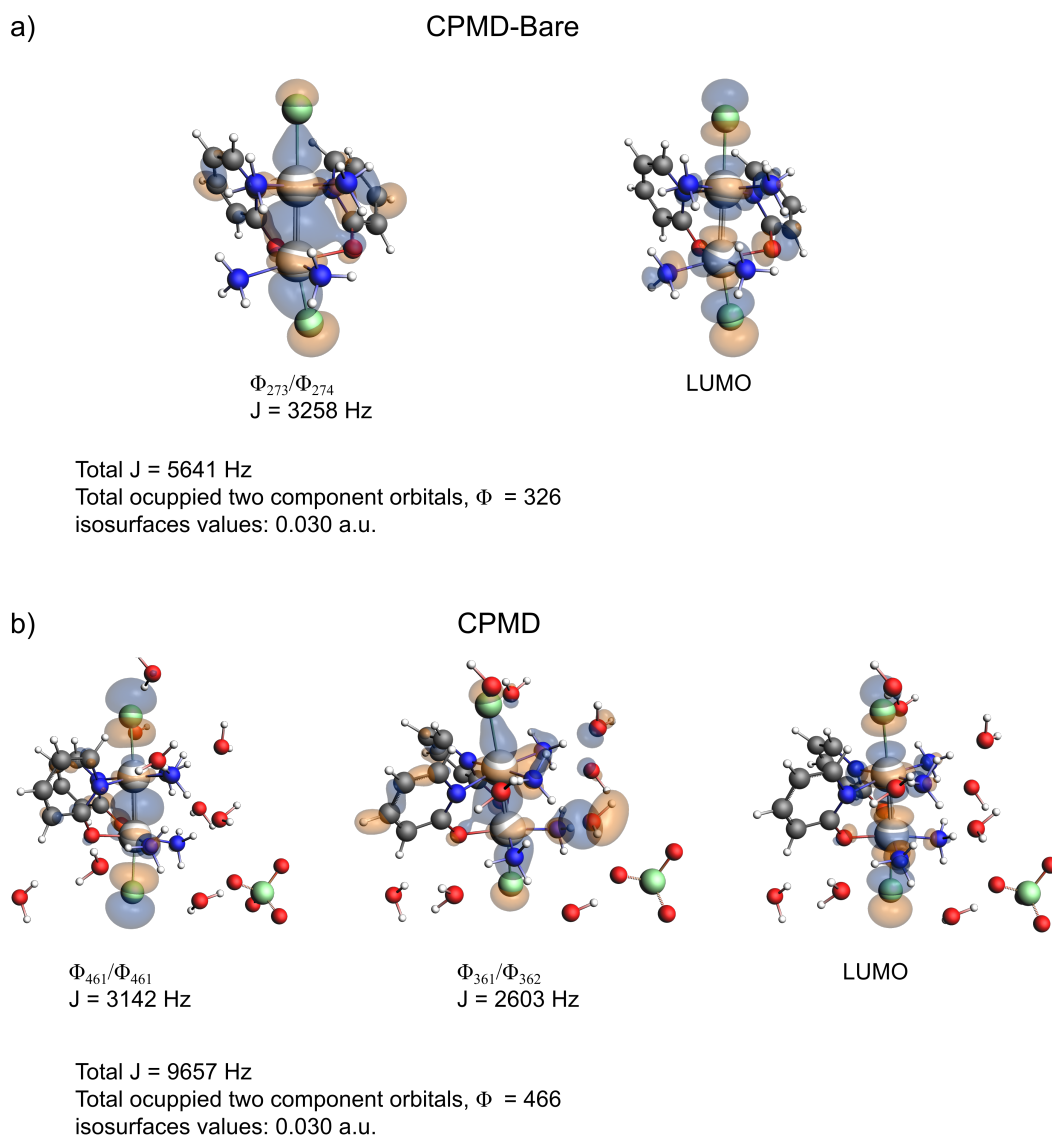

**Figure S16:** Plots of scalar ZORA canonical molecular orbitals (CMOs) with the main contributions to reduced spin-spin coupling for dihalo complex ( $\mathbf{3}^{\text{HH}}$ ) in the CPMD-Bare model (a) and CPMD model (b). Listed contributions are for spin-orbit ZORA CMOs.

a)

CPMD-Bare

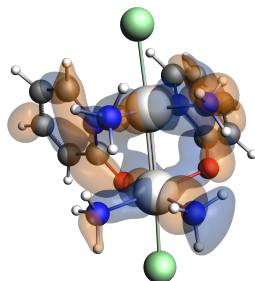
 $\Phi_{257}/\Phi_{258}$   
 $J = 3330 \text{ Hz}$ 
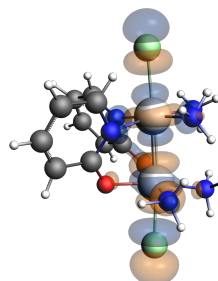

LUMO

Total  $J = 6992 \text{ Hz}$   
 Total occupied two component orbitals,  $\Phi = 318$   
 isosurfaces values: 0.030 a.u.

b)

CPMD

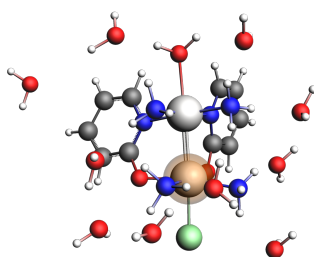
 $\Phi_{161}/\Phi_{162}$   
 $J = 5593 \text{ Hz}$ 
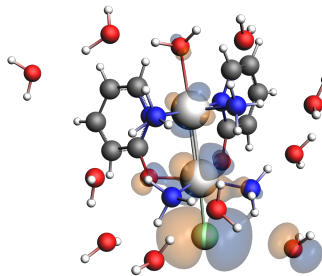
 $\Phi_{411}/\Phi_{412}$  (HOMO-3)  
 $J = 2732 \text{ Hz}$ 
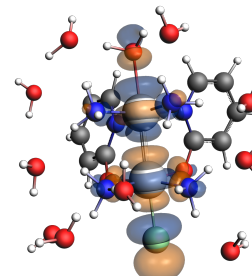

LUMO

Total  $J = 10422$   
 Total occupied two component orbitals,  $\Phi = 418$   
 isosurfaces values: 0.030 a.u.

**Figure S17:** Plots of scalar ZORA canonical molecular orbitals (CMOs) with the main contributions to reduced spin-spin coupling for aquahalo complex ( $5^{\text{HH}}$ ) in the CPMD-Bare model (a) and CPMD model (b). Listed contributions are for spin-orbit ZORA CMOs.

## 10 Evolution of Average of the Shielding Tensor

Figures S18–S21 show the evolution of average of shielding tensor. Likewise for  $^1J_{\text{PtPt}}$  the statistic stabilizes the reported averages for 256 configurations. Around 150 configurations are enough to achieve the average values and therefore, the configuration sampling are representative for complete simulations.

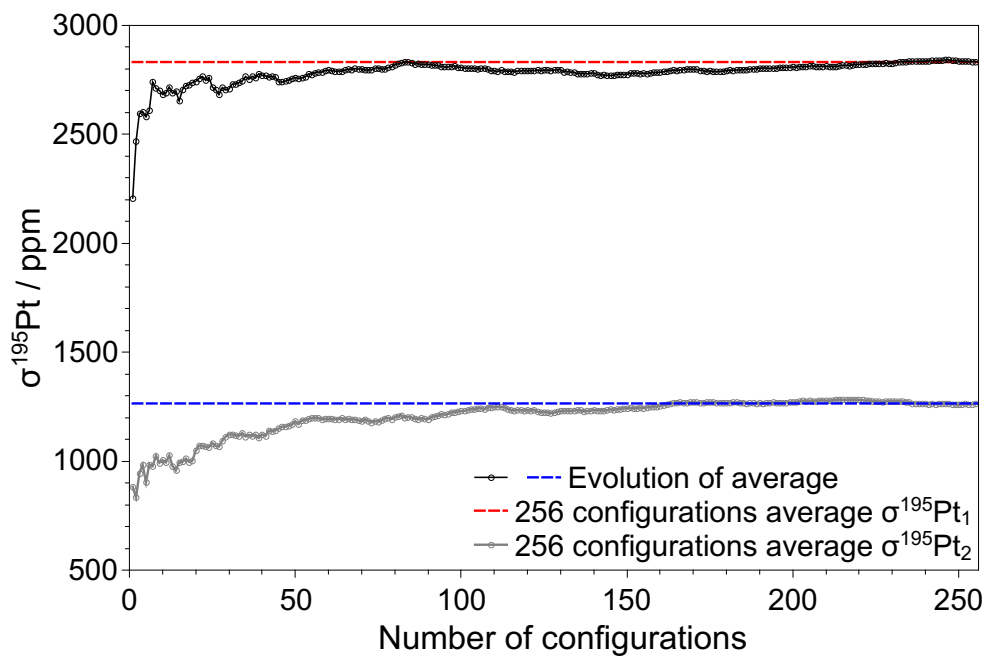

**Figure S18:** Evolution of average of the shielding tensor values for diaquo complex, using 256 configurations of production trajectory.

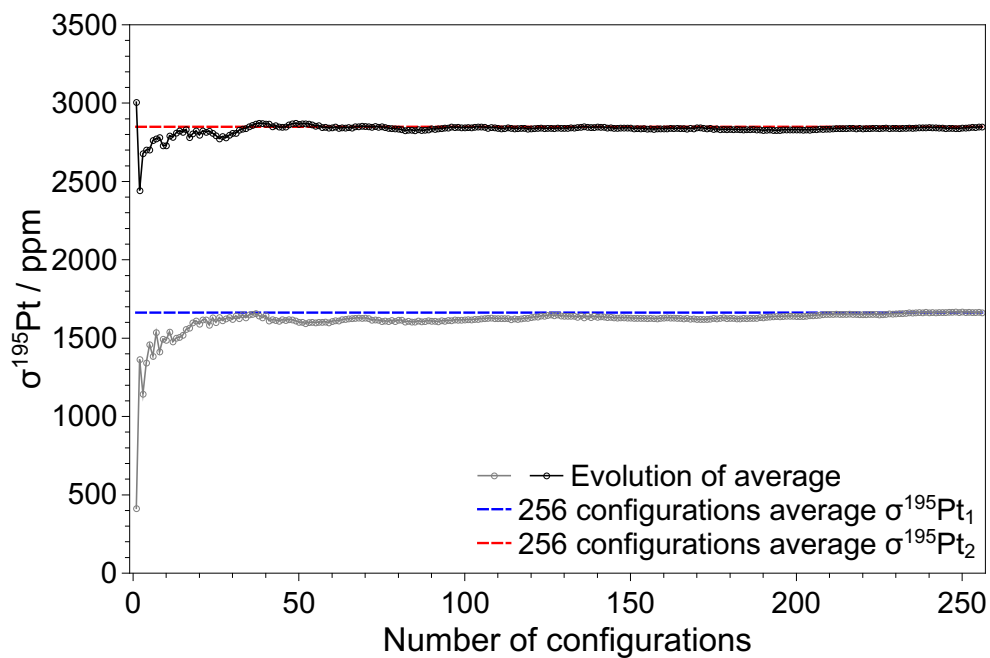

**Figure S19:** Evolution of average of the shielding tensor values for dibromo complex, using 256 configurations of production trajectory.

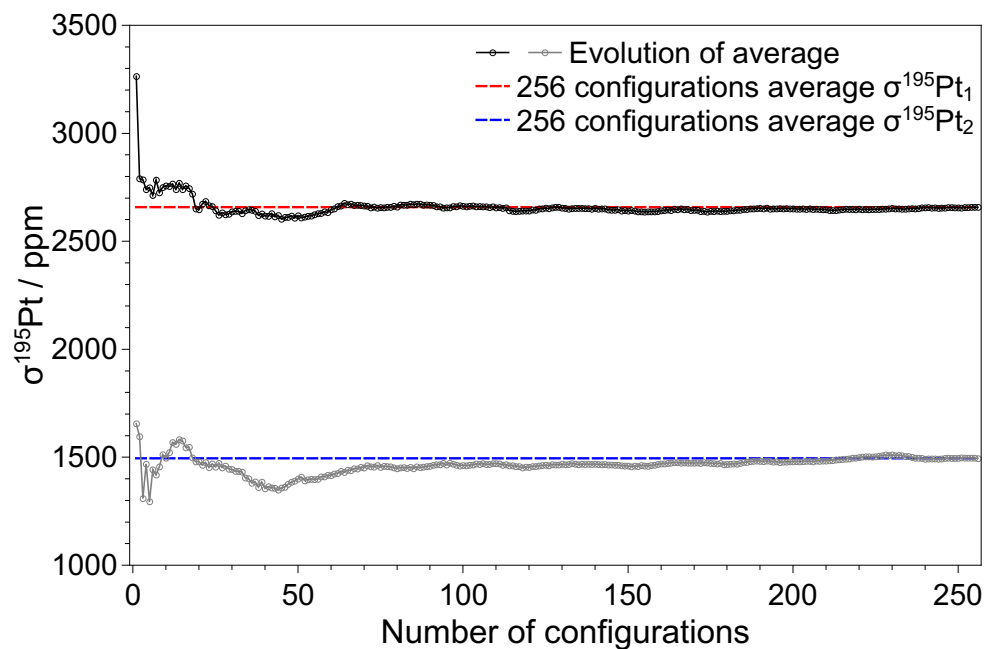

**Figure S20:** Evolution of average of the shielding tensor values for dichloro complex, using 256 configurations of production trajectory..

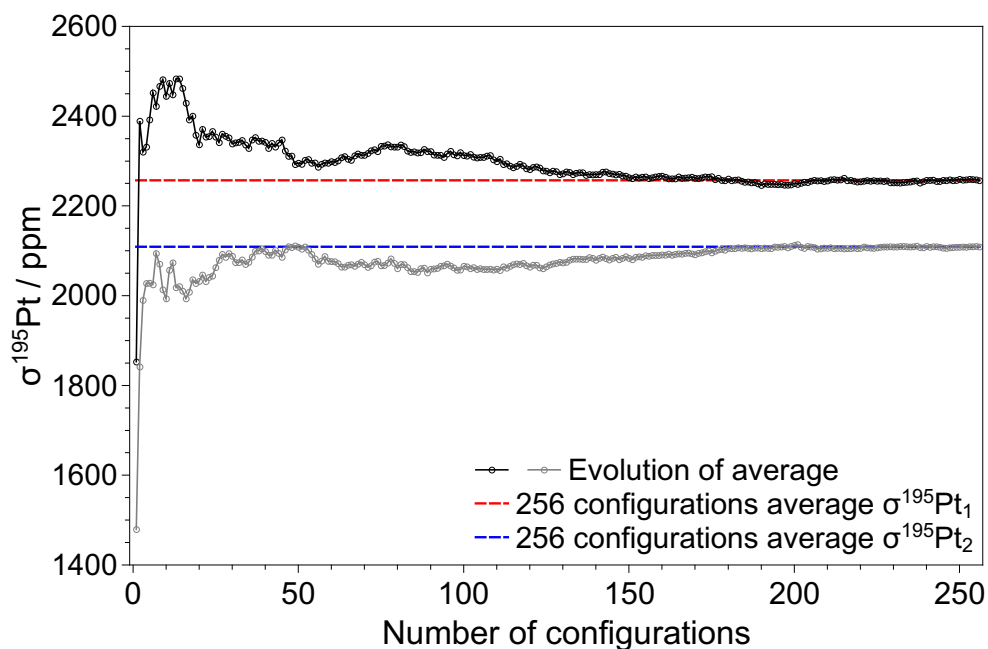

**Figure S21:** Evolution of average of the shielding tensor values for aquabromo complex, using 256 configurations of production trajectory..

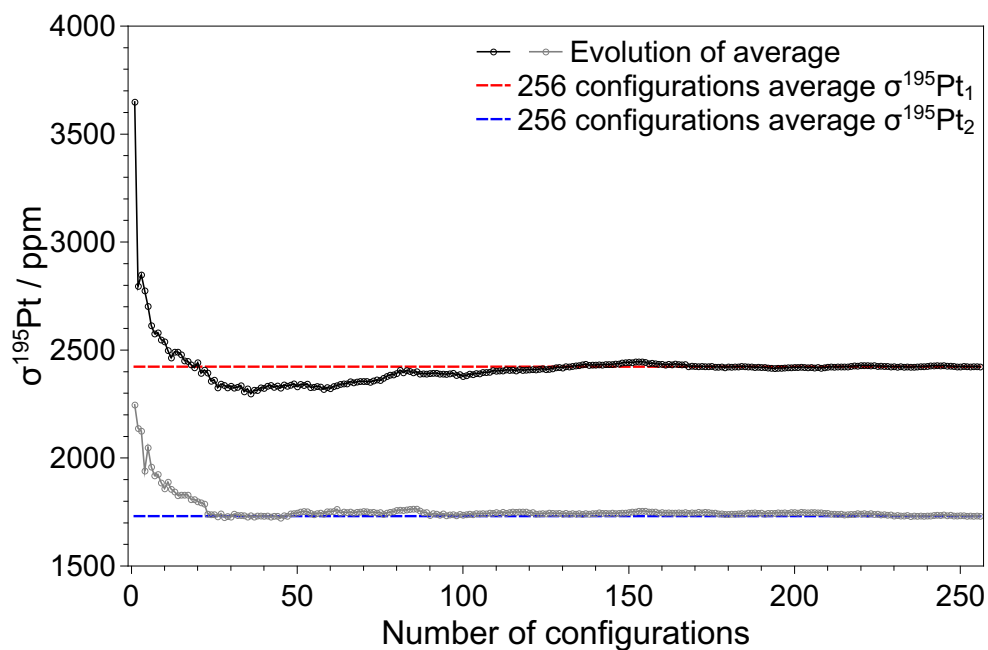

**Figure S22:** Evolution of average of the shielding tensor values for aquachloro complex, using 256 configurations of production trajectory..

## 11 Isotropic shielding of $^{195}\text{Pt}$

The chemical shifts were calculated from isotropic shielding values and experimental shifts (Table S9) using:  $\delta_{\text{calc}} = \sigma_{\text{ref}} - \sigma_{\text{probe}} + \delta_{\text{ref}}^{\text{exptl}}$ . Here,  $\mathbf{1}^{\text{HH}}$  was used as a secondary reference ‘ref’ in the calculations, and the experimental chemical shift of  $\mathbf{1}^{\text{HH}}$  with respect to aqueous  $\text{H}_2\text{PtCl}_6$  was added to convert the calculated shifts to the standard reference.

**Table S9:** Calculated isotropic shielding<sup>a</sup> of  $^{195}\text{Pt}$  of the Head-to-Head (HH) and Head-to-Tail (HT) complexes at ZORA-SO/PBE0/jcpl level of theory with different approaches.

| Complex                  | Atom                               | Unsolvated                    | COSMO                         | CPMD                          |
|--------------------------|------------------------------------|-------------------------------|-------------------------------|-------------------------------|
|                          |                                    | $\sigma_{\text{probe}}$ [ppm] | $\sigma_{\text{probe}}$ [ppm] | $\sigma_{\text{probe}}$ [ppm] |
| $\mathbf{1}^{\text{HH}}$ | Pt[N <sub>4</sub> ]                | 2167                          | 2313                          | 2832                          |
|                          | Pt[N <sub>2</sub> O <sub>2</sub> ] | 1476                          | 815                           | 1265                          |
| $\mathbf{2}^{\text{HH}}$ | Pt[N <sub>4</sub> ]                | 2214                          | 3236                          | 2849                          |
|                          | Pt[N <sub>2</sub> O <sub>2</sub> ] | 3033                          | 2292                          | 1663                          |
| $\mathbf{3}^{\text{HH}}$ | Pt[N <sub>4</sub> ]                | 1977                          | 3199                          | 2658                          |
|                          | Pt[N <sub>2</sub> O <sub>2</sub> ] | 2992                          | 2116                          | 1495                          |
| $\mathbf{4}^{\text{HH}}$ | Pt[N <sub>4</sub> ]                | 2645                          | 2763                          | 2257                          |
|                          | Pt[N <sub>2</sub> O <sub>2</sub> ] | 2387                          | 2654                          | 2109                          |
| $\mathbf{5}^{\text{HH}}$ | Pt[N <sub>4</sub> ]                | 1849                          | 2945                          | 2423                          |
|                          | Pt[N <sub>2</sub> O <sub>2</sub> ] | 2724                          | 2328                          | 1731                          |
| $\mathbf{1}^{\text{HT}}$ | Pt                                 | 3078                          | 2543                          | 2068                          |
| $\mathbf{2}^{\text{HT}}$ | Pt                                 | 2683                          | 2752                          | 2259                          |
| $\mathbf{3}^{\text{HT}}$ | Pt                                 | 2501                          | 2657                          | 2117                          |
| $\mathbf{4}^{\text{HT}}$ | Pt[H <sub>2</sub> O]               | 2195                          | 2166                          | 1746                          |
|                          | Pt[Br]                             | 2902                          | 3158                          | 2663                          |
| $\mathbf{5}^{\text{HT}}$ | Pt[H <sub>2</sub> O]               | 2259                          | 2290                          | 1768                          |
|                          | Pt[Cl]                             | 2418                          | 2921                          | 2466                          |

<sup>a</sup>Isotropic shielding of the  $\mathbf{1}^{\text{HH}}$  used as a secondary reference ( $\sigma_{\text{ref}}$ ) at the different approaches:

Unsolvated: Pt[N<sub>4</sub>] = 2167 ppm; Pt[N<sub>2</sub>O<sub>2</sub>] = 1476 ppm; COSMO: Pt[N<sub>4</sub>] = 2313 ppm; Pt[N<sub>2</sub>O<sub>2</sub>] = 815 ppm; CPMD: Pt[N<sub>4</sub>] = 2832 ppm; Pt[N<sub>2</sub>O<sub>2</sub>] = 1265 ppm. <sup>b</sup>Experimental chemical shifts of the  $\mathbf{1}^{\text{HH}}$  complex relative to aqueous  $\text{H}_2\text{PtCl}_6$  used as reference: Pt[N<sub>4</sub>] = -844 ppm; Pt[N<sub>2</sub>O<sub>2</sub>] = 393 ppm.

For  $\mathbf{1}^{\text{HT}}$ ,  $\mathbf{2}^{\text{HT}}$  and  $\mathbf{3}^{\text{HT}}$  complexes, the average of  $\sigma_{\text{ref}}$  and  $\delta_{\text{ref}}^{\text{exptl}}$  reference values was used to calculate the chemical shifts of the complexes.



## 12 Coordinates of atomic positions of the last one snapshot from CPMD equilibration trajectory

The atomic positions, in Å, equilibrated in the NVT ensemble at 350 K by 3 ps with CPMD are listed.

### 12.1 Diaquo complex 1<sup>HH</sup>

246

Last snapshot from equilibration trajectory

Pt 7.416243 7.837546 6.744898  
Pt 9.991084 7.664002 6.808564  
C 8.720590 7.985087 9.487734  
C 8.732982 8.004483 10.933730  
C 7.528220 7.830688 11.591734  
C 6.313718 7.539681 11.012206  
C 6.364395 7.543036 9.634056  
C 9.082666 10.374116 6.518701  
C 9.364464 11.790863 6.553878  
C 8.382539 12.592138 7.068001  
C 7.214750 12.034020 7.605829  
C 6.924247 10.706018 7.470372  
N 7.543583 7.777291 8.897840  
N 7.891023 9.863346 7.018816  
N 6.974784 5.800530 6.876545  
N 7.363903 7.782065 4.753348  
N 10.193554 5.770405 7.489888  
N 10.533774 7.264457 4.910362  
O 9.827131 8.249997 8.778152  
O 9.988013 9.594435 6.090142  
O -1.838995 9.688653 6.240414  
O 9.447195 4.579360 12.448998  
O 7.234532 3.726859 11.317471  
O 3.199499 2.958117 11.106586  
O 1.719200 15.186716 2.018480  
O 1.651633 9.186220 14.715131  
O 6.241594 1.722814 4.990422  
O 1.163940 16.579988 12.535599  
O -1.169257 1.351499 2.692675  
O 12.493128 6.115824 8.807031  
O 5.355547 9.734104 4.205635  
O 2.392403 7.228189 11.997996  
O 15.031374 5.462778 5.277826  
O 12.519841 3.037435 16.619684  
O 7.447033 4.492947 -1.075085  
O 3.696583 10.069986 6.540642  
O 7.960763 2.038370 7.826227

O 3.212549 10.925767 9.096502  
O 8.041756 3.898780 5.227252  
O 15.086579 13.417016 6.012648  
O 1.297399 7.513321 1.470690  
O 12.800258 8.767670 3.795028  
O 13.628018 16.435852 11.743775  
O 10.380743 0.740399 10.920355  
O 12.775311 11.210485 14.977163  
O 8.312840 4.592134 8.907869  
O 6.453018 10.157986 17.216330  
O 5.714833 12.383378 0.821802  
O -0.590881 2.434495 4.807003  
O 12.723207 12.749840 7.306658  
O 14.411790 3.770227 -2.944111  
O 8.848629 -4.121305 3.185004  
O -1.273202 6.390440 17.034863  
O 11.899765 13.129700 4.810756  
O 4.946959 7.611486 6.665421  
O 9.735877 3.757033 3.057169  
O 12.204666 12.708261 1.829272  
O 14.738486 4.541509 8.751467  
O 11.651767 15.293764 2.829267  
O 11.542896 4.575829 4.717971  
O 11.063106 10.042036 2.299232  
O 3.254498 0.448166 19.795486  
O 0.939087 10.557617 5.550981  
O -0.732662 4.280372 -0.399223  
O 10.139323 0.398653 8.376111  
O 8.994332 7.813737 2.528340  
O 3.855935 11.856627 -1.418863  
O 7.372816 -0.708715 1.458757  
O -3.238851 7.829838 6.976183  
O 0.642464 0.811296 6.301368  
O 4.887060 6.260001 4.345127  
O 9.426848 1.394437 1.711022  
O 5.558589 -0.996895 3.494903  
O 4.012750 9.830935 11.583346  
O 4.413882 18.535904 13.539574  
O 12.044869 2.780818 10.141953  
O 2.300756 15.087179 14.516660  
O 1.298429 4.800865 11.526186  
O 4.393382 16.395313 -0.026742  
O 8.955591 5.413612 0.955640  
O 12.731292 5.490075 11.317244  
O 18.138668 8.992578 3.459342  
O 10.940511 8.412195 13.200101  
O 11.289680 6.183901 13.776487

O 10.380218 7.727716 15.463306  
O 12.673030 7.994465 14.839665  
O 4.945965 7.508434 16.459837  
O 6.274244 7.574879 14.422169  
O 4.299347 8.704224 14.475157  
O 4.379208 6.198724 14.409087  
O 3.225558 3.330082 5.691165  
O 3.845734 4.885432 7.462431  
O 2.969371 2.696218 7.999592  
O 1.546917 4.409269 7.094594  
O 16.215542 11.927423 15.542344  
O 16.804161 11.717032 17.931284  
O 14.864496 10.624887 17.081594  
O 14.901291 13.076918 17.224731  
H 9.644542 8.059125 11.582295  
H 7.521140 8.023702 12.663399  
H 5.425298 7.478822 11.632925  
H 5.438306 7.382355 9.031484  
H 10.307469 12.155897 6.170608  
H 8.601943 13.623712 7.232963  
H 6.487551 12.698366 8.049532  
H 6.079221 10.155908 7.908015  
H 7.373108 5.502193 7.761494  
H 7.477292 5.115448 6.146631  
H 5.993616 5.581248 6.948618  
H 7.135278 6.838217 4.385935  
H 8.203633 8.085565 4.232994  
H 6.646312 8.436281 4.341869  
H 9.381397 5.446787 7.941740  
H 10.990733 5.750216 8.241997  
H 10.386556 5.076618 6.821042  
H 10.117062 7.573122 4.004118  
H 10.682180 6.240969 4.771731  
H 11.488459 7.651741 4.968267  
H 9.359416 4.153972 11.625258  
H 10.054834 5.333872 12.422822  
H -0.884193 9.924771 6.403430  
H -2.012562 9.515442 5.183776  
H 6.482483 3.128270 11.022369  
H 6.997585 3.716237 12.240591  
H 3.450873 2.252625 10.467832  
H 3.770735 3.051415 11.911094  
H 1.831715 15.127995 1.070694  
H 1.514800 14.220221 2.266259  
H 2.609296 9.239917 14.883424  
H 1.402660 10.128961 14.897141  
H 5.271272 1.820386 4.956223

H 6.480049 0.993994 4.391385  
H 0.284537 16.994570 12.406642  
H 1.714623 17.180380 11.950310  
H -0.789003 1.850586 3.472646  
H -0.449761 1.105779 2.101640  
H 13.240134 5.498880 8.630790  
H 12.541493 6.211814 9.821187  
H 5.763823 9.839142 3.291376  
H 4.428053 9.378310 3.975973  
H 2.002356 7.903908 11.447541  
H 2.243230 7.490316 12.943192  
H 15.841138 5.178874 5.749709  
H 14.313078 5.607417 5.923021  
H 12.099045 3.640379 17.305239  
H 13.209534 2.616592 17.167109  
H 8.264131 4.700103 -1.557118  
H 7.023953 5.373555 -0.997637  
H 4.338997 10.606277 5.928147  
H 3.713649 10.570322 7.383560  
H 7.754254 2.149703 6.886332  
H 8.872971 1.555433 7.798211  
H 3.465595 10.535821 9.959183  
H 2.420859 11.455988 9.288980  
H 7.286821 3.238463 5.161532  
H 8.649868 3.818822 4.465777  
H 15.474592 12.512953 6.060401  
H 14.394694 13.376157 6.727092  
H 1.137582 8.243421 0.751800  
H 1.351306 6.604294 1.059161  
H 13.172154 8.029586 3.302303  
H 12.289363 9.309196 3.123601  
H 13.713200 17.331335 12.242620  
H 13.384956 15.830276 12.416029  
H 10.512983 1.702553 10.740865  
H 11.240762 0.384550 11.219206  
H 12.467643 10.400255 14.627584  
H 13.762702 11.096789 15.045379  
H 8.195985 4.460737 9.865384  
H 8.274671 3.635388 8.556499  
H 6.020696 10.884728 16.778677  
H 6.649690 9.396637 16.625210  
H 4.920451 12.936761 0.831704  
H 6.513115 12.967335 1.020910  
H -0.114731 1.797740 5.502661  
H -0.306432 3.336344 5.065760  
H 12.200947 12.961188 6.447303  
H 12.820446 11.824710 7.068738

H 14.345522 3.975029 -1.993748  
H 15.288282 4.064714 -3.283979  
H 8.263342 -4.318457 3.998988  
H 8.295563 -4.505309 2.448757  
H -1.854313 6.756822 16.357002  
H -0.634653 7.160116 17.088268  
H 11.825956 14.092075 4.516135  
H 12.177610 12.815146 3.908257  
H 4.446135 8.469605 6.723682  
H 4.848235 7.087593 5.779684  
H 9.546304 4.497399 2.319590  
H 9.567439 2.885492 2.661927  
H 12.296814 12.326422 0.922171  
H 13.112430 12.846352 2.120797  
H 15.009408 5.069593 9.547604  
H 15.563768 4.391440 8.196887  
H 11.690215 14.368527 2.532524  
H 12.431107 15.805114 2.573689  
H 12.236575 3.951506 4.943627  
H 11.004660 4.083106 4.038636  
H 10.314099 10.393295 2.873073  
H 11.458348 10.913329 2.102096  
H 2.868318 0.284299 18.833055  
H 2.421267 0.782651 20.270811  
H 1.810089 10.357512 5.952428  
H 1.070014 10.817460 4.632380  
H -1.527315 3.852852 0.157301  
H -0.611563 5.117054 0.077567  
H 10.371512 0.470855 9.325190  
H 10.983589 0.290423 7.941136  
H 8.949886 7.065616 1.839970  
H 9.340858 8.647987 2.066732  
H 4.822854 11.861437 -1.111295  
H 4.018951 11.466215 -2.308561  
H 8.235209 -0.252175 1.322955  
H 7.243247 -0.580104 2.445781  
H -2.962919 7.257221 7.801111  
H -2.526864 8.598203 6.706952  
H 0.409882 1.038832 7.219804  
H 0.348055 -0.125798 6.302581  
H 4.691147 6.815784 3.598584  
H 4.313507 5.495549 4.340233  
H 9.678517 1.509510 0.755190  
H 10.215961 0.886814 2.010815  
H 4.958206 -0.335568 3.883207  
H 5.179262 -1.824644 3.750946  
H 3.945236 8.987751 12.151614

H 4.907730 10.043274 11.258500  
H 4.211976 17.798103 14.094104  
H 4.515974 19.371729 13.978162  
H 12.839141 2.291203 10.569312  
H 12.276212 3.612092 10.588083  
H 2.286748 14.186570 14.215292  
H 1.766480 15.567459 13.859397  
H 1.716209 5.657634 11.716593  
H 2.041865 4.211200 11.232248  
H 3.908824 15.726129 -0.603616  
H 5.107255 15.875350 0.270171  
H 9.617919 5.941761 0.490966  
H 8.324919 5.048410 0.286869  
H 12.329578 5.801474 12.177620  
H 13.361324 4.789781 11.669181  
H 17.900187 8.386659 2.691279  
H 17.594793 8.534329 4.147377  
Cl 11.336728 7.587044 14.321355  
Cl 4.919035 7.464018 14.919797  
Cl 2.911328 3.807724 7.073844  
Cl 15.667027 11.845605 16.914867

## 12.2 Diaquo complex 1<sup>HT</sup>

246

Last snapshot from equilibration trajectory

Pt 6.54177220 7.85948534 6.43621310  
Pt 9.27511050 7.19645812 7.67581646  
C 6.63452922 6.23973490 8.76960972  
C 6.16957154 5.18541323 9.66682174  
C 5.14692345 4.36039040 9.30788052  
C 4.51843799 4.53102045 8.03966193  
C 4.86246559 5.61434681 7.24623868  
C 8.09722073 9.95184063 8.02808557  
C 8.20926028 11.30348989 8.35822623  
C 9.40218654 11.86565968 8.67355539  
C 10.50267719 11.08085604 8.74193103  
C 10.46691929 9.75966448 8.35714551  
N 5.90702827 6.39169005 7.58044069  
N 5.97035846 6.58549736 4.86510298  
N 7.27897231 9.42875661 5.18039531  
N 9.49582746 5.10248502 7.23571582  
N 10.91191989 7.33570889 6.39799228  
N 9.29332908 9.21179063 8.05941637  
O 7.75932852 6.81038581 9.03941964  
O 4.12457528 9.37915077 5.41714373

O 11.98060267 5.66685833 11.00133337  
O 6.92438157 9.35467759 7.83402422  
O 3.94245518 7.72892860 2.78907621  
O 8.33120389 2.74002578 7.81696062  
O 3.77492653 14.28046411 5.27717360  
O 2.85503746 3.94729469 4.80529275  
O 9.00147322 7.42326161 2.98655960  
O 7.48130721 1.85422788 10.34464838  
O 2.16253612 2.55249700 1.38884655  
O 12.69649596 10.32502175 14.66215691  
O 5.53169012 12.98988756 2.65951673  
O 12.73302958 3.28394820 7.80034482  
O 5.84057637 11.91331781 5.61865620  
O 7.78769561 5.84207810 15.86085336  
O 14.29488246 10.53369003 1.38594786  
O 2.94995166 13.68121348 2.54374914  
O 4.03466562 1.69181257 10.97169650  
O 1.41342583 9.71504994 7.78305877  
O 14.18289858 11.93721912 6.74145447  
O 15.11102262 11.20956936 9.91813420  
O 1.69303575 11.54989420 1.66827677  
O 11.38330201 16.27219316 9.59439574  
O 5.24997684 4.08590620 13.09161696  
O 13.42451467 5.87495777 6.21665482  
O 2.37200710 14.44987974 11.11201422  
O 11.65364781 2.16053124 3.44003707  
O 8.66578751 12.20281186 14.89908171  
O 3.40770185 11.01524307 9.50695971  
O 1.81167245 3.49269067 12.41957138  
O 12.90857783 13.82807683 8.63939285  
O 13.13660539 8.67288195 4.50772963  
O 5.56732091 1.28005766 -0.46392684  
O 8.89161521 15.24112134 8.13145417  
O 1.61581083 6.93638161 6.53489062  
O 1.51663312 6.41772563 2.77553616  
O 5.97135775 9.86788064 2.61955311  
O 7.53585016 4.93730886 3.18979801  
O 14.88148441 6.24341776 13.62748672  
O 10.98233793 8.79120358 1.87392529  
O 14.90171714 4.13751906 1.81108536  
O 2.86595860 -0.64061361 14.55983775  
O 4.72004512 1.35615640 7.57856759  
O 4.49998804 8.36156650 14.69779826  
O 15.69321411 2.27737801 3.90059988  
O 14.24878794 1.01494720 6.89333404  
O 9.84642817 10.06234678 4.70358113  
O 9.24056042 12.98359521 2.27624173

O 6.03091967 0.45507481 5.09058842  
O 1.07780448 8.94469432 2.38234930  
O 2.08779166 -0.33157134 7.38629429  
O 12.78034308 13.55507629 1.58385683  
O 13.24617914 2.78375289 11.08710441  
O 10.07693985 0.40149723 1.85949436  
O 0.44541506 7.37318731 11.70412375  
O 2.46036231 5.16828502 14.59063674  
O 15.02811328 5.44951966 10.02649165  
O 7.14186247 9.04783200 14.93084549  
O 5.76996219 3.26894246 4.64330364  
O 8.11882253 14.17573127 13.33725746  
O 13.20928839 12.02555325 3.64942898  
O 9.83996536 4.61682167 4.13413047  
O 11.74742151 6.48689811 14.18898469  
O 9.54473619 1.75230560 14.75692390  
O 9.53857518 1.31669289 12.33310637  
O 10.90414603 3.03602678 13.24391809  
O 8.50646956 3.29677646 13.22688527  
O 6.14521284 12.37265037 10.88106110  
O 4.71998763 13.67523675 9.49149329  
O 6.92692404 14.47848496 10.14827403  
O 5.16615957 14.36084140 11.79641092  
O 1.65215042 11.70555772 11.88849713  
O 2.49047414 11.36711867 14.11628493  
O 0.49098408 10.20643260 13.32866598  
O 0.43323564 12.56995593 13.75081639  
O 13.19752116 12.95212064 11.48532587  
O 10.83165061 13.18137837 11.11952225  
O 11.67127393 12.58250871 13.30134451  
O 11.73443831 10.98549398 11.50828958  
H 6.70328743 4.93866014 10.58479501  
H 4.85175823 3.50633874 9.93368614  
H 3.83094092 3.77099097 7.71292376  
H 4.36727174 5.83952244 6.30612602  
H 5.10102215 6.85060453 4.33123292  
H 5.88920137 5.60303899 5.17529058  
H 6.72410378 6.46235689 4.15437569  
H 6.93089180 9.30037646 4.20838829  
H 8.29121298 9.70494542 5.12144328  
H 6.76386677 10.29290919 5.49263577  
H 9.40232270 4.89670221 6.21369953  
H 8.94860706 4.34913459 7.70464914  
H 10.48739690 4.92918040 7.49066764  
H 11.83284639 7.59821250 6.78059614  
H 10.70314322 8.07511144 5.68120571  
H 11.02249083 6.52229296 5.79336458



H 12.94630038 5.60347132 10.82695858  
H 11.83770534 4.79015060 11.39887010  
H 4.27683303 9.08575318 4.49993792  
H 4.73876074 10.09863645 5.64923917  
H 7.30058200 11.89762302 8.51055261  
H 9.57482682 12.90647206 8.87586967  
H 11.41932968 11.50911649 9.09728292  
H 11.34409860 9.14730261 8.47784500  
H 3.10349960 7.25051312 2.54047995  
H 3.93625870 8.56668097 2.31805881  
H 7.86510594 2.53483520 8.66398139  
H 8.48028643 1.84689236 7.41477802  
H 3.12573765 14.56657213 5.97687398  
H 3.24886202 14.00795104 4.47322008  
H 3.46006244 3.90833276 4.05225408  
H 2.21245048 4.66750473 4.62595039  
H 9.15040693 8.03050704 2.24048362  
H 8.31039961 6.79918794 2.74468924  
H 6.58156384 1.44555778 10.27310263  
H 7.98059041 1.37564946 11.06018396  
H 2.48966260 2.07938882 0.58053907  
H 1.41127534 3.14010904 1.07551842  
H 12.76443067 11.09129274 14.02176101  
H 12.63961663 9.53651443 14.09257176  
H 4.84787778 13.12356305 1.96609054  
H 6.23421721 13.64268635 2.50645863  
H 12.64253505 3.05909752 8.75636674  
H 13.06116152 2.46178638 7.34864181  
H 5.92759569 12.20250684 4.66938292  
H 5.16306716 12.57608055 5.88345988  
H 7.73968707 6.80416050 15.60676663  
H 7.67477549 5.36826820 15.00314014  
H 13.73495297 10.26768670 0.61820128  
H 13.80039626 11.30065285 1.76967280  
H 2.72316787 14.49774198 2.08676859  
H 2.25379185 12.97236171 2.39402407  
H 4.17519318 1.41170951 11.90325749  
H 3.52770623 0.89676023 10.69542726  
H 2.07421018 10.45849582 7.87391428  
H 0.87118712 9.84094219 8.58605605  
H 14.60672011 11.06003225 6.61804340  
H 14.51148061 12.25095715 7.61067897  
H 15.62357732 11.73100231 10.59118466  
H 14.16559372 11.49171577 10.01992260  
H 2.29225709 11.45743464 0.86939009  
H 0.82776745 11.15628709 1.40329602  
H 10.98233532 16.40702832 10.48284999

H 11.42673056 17.11094808 9.12445147  
H 5.33688597 4.66339115 13.85676176  
H 6.11802370 3.67449362 12.88924657  
H 13.28206059 5.18704361 6.88387335  
H 14.36371387 6.12273244 6.28024355  
H 1.68680936 13.76513162 11.18677256  
H 3.15141451 14.14542417 11.62974179  
H 11.23522508 1.42834148 2.90239267  
H 11.89187423 2.80136216 2.75882374  
H 9.29263545 11.59330583 14.44123470  
H 8.31286792 12.86890442 14.23749285  
H 4.26401632 11.24495854 9.81259699  
H 2.95985108 11.18931318 10.34047722  
H 2.55020506 2.91728744 12.10634182  
H 1.54325190 4.15929135 11.77187694  
H 12.12616093 14.41812420 8.67515631  
H 13.30910409 13.89514527 9.53087142  
H 12.89633720 9.51491086 4.05490858  
H 13.66715792 8.22271856 3.81905831  
H 6.19547352 0.90090917 -1.11114894  
H 4.81033597 0.65612851 -0.47098407  
H 8.38619381 14.96958351 8.93609465  
H 9.55957048 15.83937660 8.53410205  
H 1.10969423 6.26172251 7.03419008  
H 1.40838658 7.82172224 6.92274329  
H 1.23031256 5.79435759 2.08459210  
H 1.22006176 7.33862598 2.57361656  
H 5.87583414 9.49350128 1.72541299  
H 6.10692006 10.82207804 2.40040910  
H 7.50859141 4.52093504 2.32662057  
H 7.15533415 4.26465148 3.80458941  
H 14.11419374 6.06458756 14.20195038  
H 15.58178963 5.62541747 13.89085303  
H 11.57395679 9.42982990 1.44166805  
H 11.56617245 8.25005799 2.43340551  
H 14.19449638 4.64365336 1.37605628  
H 14.52319916 3.71091365 2.58922139  
H 2.28441005 -0.54864185 13.76805743  
H 2.21443557 -1.00954759 15.20194991  
H 5.29579773 1.27709786 6.81966535  
H 4.27592769 0.49066207 7.59186088  
H 3.58486050 8.64301971 14.45334197  
H 4.38966739 7.83845586 15.52997258  
H 15.44534760 1.62023745 3.22183299  
H 16.66997143 2.29358247 3.80952455  
H 14.62633873 1.11945528 5.99344880  
H 13.64010617 0.25748919 6.86204283

H 10.35023893 10.87335162 4.92569022  
H 10.24267892 9.61122494 3.93816880  
H 9.71491775 12.26393467 2.70307573  
H 8.81092286 12.61691034 1.45754966  
H 6.73145266 -0.10834698 4.72887652  
H 5.20064682 -0.12085179 5.16549934  
H 0.33504453 9.32160472 1.85878441  
H 1.74603414 9.64589241 2.45229783  
H 1.86370630 0.56244786 7.68880595  
H 2.18068243 -0.92137593 8.16868583  
H 11.93227959 13.66597147 1.12004166  
H 13.42231787 13.94306793 0.97349226  
H 14.17900805 2.80967172 11.30376728  
H 12.96843941 1.90062949 11.38701805  
H 9.85834436 0.98454239 1.11281496  
H 9.75513937 -0.51175819 1.69215821  
H 0.38079041 7.46790339 12.67322425  
H 0.21926847 8.26891733 11.37990425  
H 3.30970091 4.95044169 15.00812798  
H 2.38335213 4.57469569 13.80191575  
H 15.41090379 6.17488687 10.57006528  
H 15.17802638 4.59518932 10.46101839  
H 6.29507586 8.84250780 14.41317202  
H 7.77348490 9.41235720 14.27772441  
H 5.86314526 3.29351822 5.62036382  
H 6.04262482 2.32411411 4.47180979  
H 7.58073764 14.13738809 12.49658935  
H 8.99914355 14.48270853 13.07122819  
H 13.61729223 12.35016291 4.47358582  
H 12.87021038 12.82324220 3.20226328  
H 9.99967782 3.71450704 3.79202084  
H 9.23845051 5.07551754 3.51549309  
H 11.98038244 5.88480415 13.44175562  
H 10.85441319 6.19135092 14.46297810  
Cl 9.62992340 2.35246486 13.41287457  
Cl 5.70409680 13.72314808 10.57263558  
Cl 1.25816680 11.47183516 13.31615690  
Cl 11.87320084 12.43361904 11.83393345

### 12.3 Dibromo complex 2<sup>HH</sup>

238

Last snapshot from equilibration trajectory

Pt 6.752236 8.191100 5.588234

Pt 9.265512 8.276096 5.782055

C 8.017692 5.963015 7.089014

C 7.981750 4.847795 7.877200  
C 6.750372 4.515950 8.469398  
C 5.676538 5.453798 8.431990  
C 5.776607 6.541532 7.664300  
C 7.715948 9.672093 7.949843  
C 7.586670 10.709899 9.008089  
C 6.460998 11.444766 9.091897  
C 5.272651 11.167308 8.362312  
C 5.313364 10.164277 7.423564  
N 6.941761 6.812856 6.994997  
N 6.493485 9.435357 7.200334  
N 6.909508 6.695579 4.119657  
N 6.403237 9.910059 4.491849  
N 9.959143 7.554656 3.893782  
N 9.492154 10.280667 5.209814  
O 9.068386 6.302888 6.361849  
O 8.832468 9.155375 7.539182  
O 0.371378 12.995631 12.717964  
O 10.411140 0.338264 15.620839  
O 3.434194 16.358452 4.839111  
O 13.349326 11.989759 11.516459  
O 2.013065 8.841069 2.637568  
O -5.008217 11.272659 10.865703  
O 2.707313 8.811636 -2.259593  
O 14.898162 6.895240 11.609599  
O -0.395274 9.066899 4.167837  
O 6.945080 -0.902360 7.263222  
O 9.142619 15.760170 8.465833  
O 12.543077 9.997960 13.724151  
O 11.608289 13.122869 0.275090  
O -2.472642 11.077847 5.493491  
O 4.212839 -5.124572 11.370413  
O 6.814726 3.950748 17.997963  
O 10.484643 13.207015 8.784486  
O 15.046043 12.258143 3.289250  
O 4.909208 10.171781 1.828840  
O 11.800041 12.800912 3.531704  
O 0.305556 10.563927 16.534636  
O 17.018518 1.423398 11.926627  
O 4.181777 4.769816 15.664983  
O 15.103559 15.607304 13.449426  
O 18.430983 7.451239 15.748042  
O 12.828752 15.023416 7.007630  
O 6.672936 8.802699 -2.807311  
O 12.201211 16.620504 13.336153  
O 16.756418 -3.187979 7.887918  
O 9.581466 4.890154 2.976667

O 2.266948 18.759581 14.381718  
O 6.413792 11.400826 12.535195  
O 1.992216 -2.146680 4.527709  
O 2.273102 8.145159 10.286619  
O 14.139036 -0.631368 4.759519  
O 11.183377 3.387659 5.072911  
O 8.839505 12.778080 6.052563  
O 15.681807 4.049622 16.910091  
O 1.032779 -0.062218 21.213440  
O 4.182160 3.063830 18.043592  
O -2.049739 5.239235 5.704792  
O 11.686244 3.721923 1.441615  
O 4.206920 -1.298352 6.736019  
O 2.302764 12.157662 10.613965  
O 4.343033 13.685821 1.802973  
O 3.298159 1.099416 15.837675  
O 6.151040 6.891904 16.507774  
O 11.552318 0.745061 2.775176  
O 10.490314 1.067526 6.120594  
O 13.826055 -3.007783 7.837052  
O 4.832760 4.516616 4.987817  
O 11.197250 14.282255 11.418088  
O 13.460250 6.634318 14.006423  
O 13.379228 8.770900 0.584189  
O 1.627215 11.181042 13.954350  
O 0.407213 1.228058 16.141890  
O 9.841564 12.558370 13.287255  
O 12.608212 7.548429 2.865211  
O 20.994450 2.353002 6.223143  
O 5.115805 12.501014 4.716512  
O 13.378345 4.741489 2.951155  
O 5.846458 12.010402 0.054626  
O 6.732395 -0.804292 4.075747  
O 7.607234 0.414746 2.191857  
O 7.294530 1.426597 4.402259  
O 9.080568 -0.293628 3.950107  
O 8.492154 8.587666 1.441674  
O 10.443521 9.887299 1.315385  
O 8.536036 10.422141 -0.147624  
O 8.398879 10.799415 2.285833  
H 8.902023 4.321562 8.159318  
H 6.684082 3.606069 9.022178  
H 4.820406 5.130634 9.064121  
H 4.976979 7.265861 7.543451  
H 8.410072 10.779759 9.773115  
H 6.257689 12.230500 9.805147  
H 4.408271 11.929640 8.310558

H 4.550195 9.897604 6.648070  
H 6.273839 5.905930 4.292704  
H 7.851239 6.274798 4.060501  
H 6.643520 6.795421 3.108957  
H 5.955534 10.717598 4.985446  
H 5.867041 9.732856 3.546581  
H 7.317146 10.129689 4.092216  
H 10.886636 8.011781 3.638626  
H 9.251672 7.713378 3.092441  
H 10.180127 6.541116 3.990910  
H 9.415441 10.446495 4.239076  
H 10.492377 10.401592 5.455483  
H 8.952085 11.006767 5.744329  
H 0.239156 13.847969 13.162232  
H -0.538213 12.679785 12.443975  
H 9.571552 0.163659 16.098864  
H 10.673264 -0.575085 15.417858  
H 2.509566 16.307301 5.239248  
H 3.850066 15.566699 5.183203  
H 13.275098 11.285431 12.203997  
H 12.842749 12.722792 11.883749  
H 2.453976 9.179490 3.419542  
H 1.301535 8.192568 2.886131  
H -4.543757 11.929694 10.303455  
H -4.654418 10.370769 10.821729  
H 2.236288 8.354659 -2.945832  
H 2.212845 9.740067 -2.151945  
H 15.058848 7.845810 11.865329  
H 15.422451 6.824548 10.768193  
H -1.240924 8.696155 3.847878  
H -0.430879 9.941692 3.713321  
H 6.600041 -0.364704 6.507427  
H 7.521911 -0.320442 7.823745  
H 9.685392 16.177776 7.705096  
H 9.598024 15.870740 9.305433  
H 11.978810 10.750628 13.916327  
H 12.773368 9.594013 14.628537  
H 11.629770 12.798227 1.217831  
H 11.143076 12.541555 -0.374676  
H -1.837600 10.306745 5.290520  
H -1.951128 11.399599 6.268136  
H 4.887632 -4.481070 11.774343  
H 3.768473 -5.566612 12.176120  
H 6.558442 4.294650 17.164083  
H 6.042221 3.456773 18.356739  
H 10.039631 13.695911 8.067369  
H 10.686638 13.821956 9.489063

H 15.970777 12.603105 3.608231  
H 14.339550 12.747675 3.688675  
H 5.519294 10.493121 1.142519  
H 4.207763 9.794892 1.310138  
H 11.924103 13.658170 3.918627  
H 12.011912 12.127299 4.192719  
H -0.001410 11.362348 17.003275  
H 0.893464 9.999285 17.081200  
H 17.505035 2.067110 12.427544  
H 17.649641 0.936397 11.314123  
H 3.739012 5.650740 15.592882  
H 4.013120 4.382710 16.561237  
H 14.148247 15.763319 13.295093  
H 15.618829 16.203989 12.870848  
H 17.813929 7.759573 14.975431  
H 18.061563 7.819531 16.545553  
H 12.971791 14.150006 7.446293  
H 11.880689 15.212199 6.977616  
H 6.582592 8.114926 -2.160716  
H 6.041507 8.504285 -3.530498  
H 11.690146 16.256680 14.028018  
H 12.566278 17.421690 13.726134  
H 17.165888 -3.163006 8.825585  
H 17.376390 -3.305742 7.186172  
H 8.755960 4.354871 2.858411  
H 10.294239 4.567384 2.289371  
H 2.859764 19.315432 14.979563  
H 1.564122 18.543274 15.000290  
H 6.384790 10.438891 12.868445  
H 6.091486 11.940201 13.291686  
H 1.705158 -1.215733 4.950996  
H 2.841867 -1.879718 4.085256  
H 3.268039 8.149188 10.183682  
H 1.892325 8.982657 9.944804  
H 13.610182 -0.764493 5.601364  
H 13.655866 -0.165320 4.008993  
H 10.492335 3.895805 4.605050  
H 11.744963 3.040438 4.283282  
H 8.751974 13.224567 5.181097  
H 7.962892 13.201112 6.457133  
H 16.427284 4.387552 17.504074  
H 15.856590 3.077021 16.713062  
H 1.217201 -0.636336 21.986563  
H 0.066337 -0.027630 20.963055  
H 4.365809 3.809150 18.744656  
H 3.767109 2.298268 18.573586  
H -2.596717 6.085340 5.692415

H -2.443387 4.798865 6.529263  
H 11.622047 2.751202 1.568318  
H 12.534476 4.095692 1.859037  
H 4.393909 -2.089543 6.125302  
H 4.839016 -1.235951 7.499900  
H 3.020514 11.697736 11.143044  
H 1.591056 12.499591 11.307547  
H 3.639478 13.916629 1.110288  
H 4.705148 14.572939 1.989158  
H 3.222584 1.627528 15.054015  
H 3.702880 1.778428 16.373980  
H 5.261983 7.323619 16.237116  
H 6.792443 7.601647 16.354670  
H 10.854314 0.775115 3.448843  
H 11.161369 0.818426 1.902626  
H 10.699000 2.051005 5.779185  
H 9.859950 0.726485 5.438432  
H 14.833043 -2.969527 7.876426  
H 13.399441 -3.261814 8.682013  
H 5.329951 3.709759 5.363737  
H 4.411619 5.125347 5.609863  
H 10.465587 13.966146 12.050976  
H 11.403646 15.179892 11.647778  
H 13.435447 7.385694 13.363639  
H 14.090172 6.052657 13.480339  
H 13.732659 7.919734 0.334588  
H 14.236279 9.283569 0.770414  
H 1.080276 11.806931 13.442677  
H 1.200391 11.155663 14.815981  
H 1.387558 1.170884 16.058010  
H -0.031187 1.053636 15.275514  
H 9.071678 12.075116 13.696034  
H 10.146752 12.078488 12.466401  
H 12.681684 6.586929 2.789363  
H 12.572189 7.856494 1.943932  
H 20.189777 1.819094 6.020464  
H 21.607008 1.857648 5.601238  
H 5.766417 13.250896 4.682559  
H 4.745391 12.371376 3.793108  
H 13.294383 4.680158 3.982206  
H 14.295190 4.545434 2.549775  
H 6.812008 11.968285 0.034263  
H 5.634279 12.780087 0.653306  
Br 11.890036 8.271668 6.705983  
Br 4.129695 7.936325 5.263799  
Cl 7.706327 0.167760 3.596988  
Cl 9.023505 9.949107 1.197092



## 12.4 Dibromo complex 2<sup>HT</sup>

238

Last snapshot from equilibration trajectory

Pt 9.06594848 7.02530049 7.03734340  
Pt 6.44398575 7.76174937 6.36788695  
C 6.95782203 5.53864197 8.36002321  
C 6.57977924 4.47618316 9.24889983  
C 5.38881789 3.82883977 9.13385804  
C 4.49461293 4.30780566 8.17704135  
C 4.84538876 5.34959017 7.35683680  
C 7.74754292 8.94753349 8.90798530  
C 7.64311697 9.67026358 10.13052149  
C 10.08592968 9.36158148 8.75173168  
C 8.77804322 10.35239028 10.52021865  
C 10.03704196 10.23284811 9.76962791  
N 6.05889599 5.95421314 7.43545012  
N 5.91228245 6.83692114 4.61193385  
N 6.67905458 9.67964576 5.58776451  
N 9.04765945 5.21493936 6.04384921  
N 10.27229283 8.27247250 5.63861785  
N 9.00752080 8.73719213 8.27387399  
O 8.14991036 5.96497252 8.49975385  
O 6.67214082 8.43728903 8.39151001  
O 11.34645635 1.61533384 1.87132304  
O 5.10116359 1.23121223 11.11390626  
O 1.95996324 12.78334754 8.61020357  
O 6.60795538 12.03804088 14.40751584  
O 2.14325020 4.66088396 1.85352797  
O 1.57454434 2.79113813 8.74156762  
O 6.22700078 3.24641514 5.05471098  
O 13.79863168 4.63485280 13.70425294  
O 6.25328956 13.14359530 3.94128633  
O 8.91500511 4.66838884 13.63405143  
O 11.21389025 10.02421568 14.06635711  
O 12.69686715 1.64832625 13.79662154  
O 12.12273111 12.41587218 0.87848555  
O 1.38465451 15.48229710 7.40192889  
O 5.57703937 4.42185855 13.21638034  
O 1.07369154 2.91117642 5.70893315  
O 9.55994426 14.48740557 2.64322553  
O 12.83230289 9.33258299 7.37800465  
O 2.14940581 8.99846643 3.80628466  
O 12.41214364 6.49688818 4.87314782  
O 3.75836080 6.04694019 12.19520166

O 12.76917675 3.51856670 5.66289360  
O 1.78052959 7.65822083 9.52250345  
O 13.46677429 4.68932028 10.52991309  
O 9.57296034 13.92745417 14.34620505  
O 14.10810917 11.39828487 5.37934617  
O -0.56556713 7.22956637 8.09739751  
O 12.64169932 13.32830146 13.19294669  
O 9.40869944 1.48584535 5.53619373  
O 1.19996612 5.81126957 5.37486240  
O 2.42179081 13.42308991 2.68617166  
O 6.48943497 13.85287703 11.44420182  
O 1.56175037 4.22763746 12.60024175  
O 1.47252982 11.53873669 6.27766950  
O 4.39227078 2.20315262 6.83442668  
O 15.11287672 11.57462382 13.04662968  
O 15.01336631 13.34320877 1.07266605  
O 12.60127157 3.64059818 2.54156159  
O 2.36173648 11.18913835 10.56407218  
O 1.91620620 2.59923285 14.83073312  
O 8.42507701 10.06921596 16.12078923  
O 12.40920618 9.93026287 4.21460190  
O 9.71450697 1.46726692 13.83196565  
O 3.92262918 11.34372260 3.95411239  
O 4.99008618 12.10786140 1.46988217  
O 10.90249862 3.39350241 11.30631203  
O 8.74202056 13.25957180 6.17485328  
O 9.92926418 0.15493170 11.63736407  
O 8.18654536 9.16921601 3.22853314  
O 14.74190709 4.01036185 7.98122805  
O 6.06026972 7.77180842 1.83836997  
O 5.94154454 13.62702308 6.67045669  
O 12.67447752 7.57450247 11.98644379  
O 12.90567217 12.17425249 8.71934349  
O 1.88794986 14.88510251 14.49515849  
O 11.93948987 1.21152658 7.38376316  
O 4.14600541 8.75916189 11.53356747  
O 11.41147231 13.72293722 6.08119815  
O 12.99974020 -0.52859067 2.46849884  
O 3.51232842 13.92480871 10.57987123  
O 11.21893352 12.61983217 3.48500923  
O 12.02251427 14.28058871 10.63829812  
O 4.83259154 0.56800704 2.99220696  
O 4.08228124 1.30935598 0.90083832  
O 4.26397209 2.85948175 2.70008132  
O 2.54200766 1.14135366 2.69165196  
O 8.35639545 3.67350600 2.85063387  
O 8.50806371 6.01136943 3.33781498

O 7.13166660 5.20949011 1.52238269  
O 9.56521654 5.05725121 1.35956240  
H 7.32073939 4.28155936 10.02153139  
H 5.18044273 2.97514459 9.77427363  
H 3.49844936 3.89145075 8.12004367  
H 4.12316737 5.70275420 6.62721849  
H 6.15687751 5.82763846 4.58317503  
H 6.21153882 7.30159588 3.73542692  
H 4.89667404 6.91427755 4.55068774  
H 5.76652009 10.03250328 5.27532991  
H 7.32539096 9.82506724 4.78280521  
H 6.96230216 10.23144823 6.40172281  
H 8.10963212 4.81136147 5.86339818  
H 9.62270898 4.51917396 6.52614476  
H 9.42902073 5.42310122 5.10196186  
H 9.79147040 8.50431012 4.76361589  
H 11.16551683 7.77549437 5.47799550  
H 10.44265891 9.11421795 6.19495632  
H 6.65132227 9.71020511 10.61637666  
H 10.99429868 9.24240894 8.21787991  
H 8.73422694 11.03113117 11.38285676  
H 10.88724386 10.76363637 10.18266940  
H 12.11805231 0.98104463 1.85481093  
H 11.05231654 1.66831241 0.93704483  
H 5.57792853 0.78978294 11.84496799  
H 4.94529704 0.51061053 10.46350158  
H 1.32367129 12.32493923 9.20718088  
H 1.50083474 13.44731412 8.01511598  
H 6.14301515 12.20790635 13.57700683  
H 5.98976982 11.57339896 14.99784900  
H 2.61979544 3.83220689 2.10312927  
H 2.34421088 5.24514753 2.60873560  
H 0.63471648 3.06558917 8.54148600  
H 1.59678730 2.97260429 9.69892315  
H 6.17820439 2.61627699 5.77997062  
H 6.27997525 2.77982740 4.20677972  
H 13.23350393 3.93248407 14.10882854  
H 13.38919387 5.47533048 14.00400821  
H 5.66129329 12.77615557 3.23139501  
H 6.37265452 14.10477505 3.80206103  
H 9.29858081 4.46600603 14.51065160  
H 8.00732585 4.98170003 13.78552698  
H 11.61452915 10.67240796 13.46576881  
H 11.69729217 9.19152762 13.90436615  
H 11.73327461 1.53768543 13.92039099  
H 12.90234971 1.52731360 12.85794676  
H 11.98597040 12.38382234 1.87155123

H 12.09990475 11.50909150 0.51556842  
H 1.62643464 15.69488696 6.48545314  
H 1.58795700 16.27567055 7.96628212  
H 5.83696925 4.47995999 14.16208681  
H 5.97129002 3.57882139 12.95079017  
H 1.11052680 2.87889574 6.69203244  
H 0.09661695 2.98338632 5.62728237  
H 9.77176121 13.53669276 2.75533247  
H 10.35238023 14.95240446 2.38974631  
H 13.28297899 9.14507105 6.53578261  
H 13.09965010 8.57654822 7.93944831  
H 2.20679941 9.09279732 4.78057203  
H 2.74407564 8.23148468 3.66091887  
H 12.64131636 6.21615632 3.95251773  
H 13.28552565 6.75414201 5.24162925  
H 2.87722218 5.60044500 12.26234507  
H 4.32537891 5.54366714 12.82630124  
H 12.43770012 2.60193468 5.59574170  
H 12.53497291 3.90938955 4.79153294  
H 1.86589001 6.92753049 10.16990548  
H 2.43753894 7.40265217 8.83695684  
H 13.82083730 4.79562935 11.43186312  
H 12.53992842 4.38061713 10.66005206  
H 9.45784210 14.83299360 14.67156572  
H 10.35506646 13.60523261 14.84280734  
H 13.88462621 12.31919436 5.17230707  
H 15.08880009 11.42044668 5.56467534  
H -0.37616961 6.48314844 7.49911228  
H 0.27291060 7.36259615 8.62074653  
H 13.37260389 12.68280445 13.14578294  
H 12.89214438 14.03050276 13.81567337  
H 9.80880433 0.99084317 4.78473336  
H 9.06314282 2.24294516 5.02916648  
H 1.40027394 5.25696901 6.15085200  
H 1.30000605 5.19901067 4.62138056  
H 2.40973191 14.37070270 2.42545393  
H 1.46090115 13.29769563 2.77162962  
H 5.71349118 13.47934920 11.00711365  
H 7.11479993 13.15154011 11.67604734  
H 0.70105942 4.31747975 13.06278645  
H 1.96723614 3.50859325 13.12895492  
H 1.83096150 11.55139557 7.19737328  
H 2.00013371 11.03677833 5.66233015  
H 3.71407511 2.39616029 6.16520646  
H 4.98745768 1.49117796 6.53421819  
H 15.57932340 10.83667090 12.62431900  
H 15.19522803 11.34796617 13.99584600

H 15.64373281 13.25668317 0.33520562  
H 14.17972457 12.88483100 0.81991952  
H 13.45457866 3.25663816 2.28628751  
H 11.96851673 3.11596197 2.00722875  
H 3.21543270 11.65668539 10.47290710  
H 2.46015893 10.25387500 10.26932222  
H 2.78683642 2.26269549 15.13776191  
H 1.86002651 3.52614556 15.11938672  
H 7.65725559 10.61540438 15.88460747  
H 9.18733594 10.49718880 15.68961968  
H 12.79533350 9.21637652 3.66791001  
H 13.23621699 10.36937649 4.58510128  
H 8.82738826 1.61561584 14.21318933  
H 9.70134597 0.88619156 13.00579123  
H 3.29820465 12.10809291 3.98525103  
H 3.37287838 10.56647501 3.70899773  
H 5.43299412 12.91359629 1.14604908  
H 4.08187289 12.42000280 1.66932181  
H 10.20642671 2.77834535 11.02448227  
H 10.71992371 3.56286361 12.25184680  
H 8.31794334 13.30037754 5.29236537  
H 7.99269244 13.53800305 6.74960428  
H 9.54113906 -0.70386363 11.86688727  
H 10.79596694 -0.04282719 11.19236389  
H 7.61773593 8.41433808 2.93415273  
H 8.32827831 9.73723482 2.39847452  
H 14.38038602 4.20078391 8.88274765  
H 14.05815138 3.73307135 7.34013789  
H 6.39821715 6.85936957 1.63270577  
H 5.77777191 8.13644796 0.98108781  
H 5.20421904 13.67815941 7.30011474  
H 5.50063133 13.42338224 5.80953489  
H 11.73120272 7.33290952 12.02442686  
H 12.94897629 7.33119448 11.08202783  
H 12.82120747 11.34660496 8.19601861  
H 11.98116199 12.46925829 8.76451071  
H 2.81876208 14.60672617 14.49947746  
H 1.83772973 15.71222746 13.97639596  
H 11.03791720 1.57333716 7.28002474  
H 12.27961475 1.41413633 8.27758606  
H 3.64200728 8.03021417 11.95419642  
H 4.68888021 8.24044139 10.90777668  
H 10.52644131 13.33095215 6.31022599  
H 11.41387447 14.53065882 6.65168116  
H 13.50899242 -0.34748612 3.27242804  
H 13.69905385 -0.93795743 1.90005904  
H 3.25430339 14.21158578 11.46297933

H 2.75061004 13.77199703 9.98315000  
H 11.39387904 11.70229840 3.79905273  
H 11.40170426 13.40608848 4.04232484  
H 12.55598869 14.18805600 9.82774949  
H 12.52858526 14.18029002 11.48141791  
Br 11.32416673 6.42600990 8.02986217  
Br 4.01145231 8.61687551 6.53926975  
Cl 3.93088130 1.46622003 2.31923830  
Cl 8.40019659 4.97827760 2.23979356

## 12.5 Dichloro complex 3<sup>HH</sup>

238

Last snapshot from equilibration trajectory

Pt 6.896254 8.728518 5.931315  
Pt 9.097945 7.943642 6.957417  
C 6.956720 5.958748 7.053604  
C 6.271353 4.784726 7.459255  
C 5.053305 4.406106 6.944170  
C 4.408959 5.248133 6.056373  
C 5.151687 6.386884 5.607520  
C 7.193613 8.982003 8.816739  
C 6.821352 9.021377 10.131142  
C 5.479669 8.682446 10.477309  
C 4.583739 8.337577 9.447934  
C 4.999866 8.380728 8.112636  
N 6.392970 6.752212 6.080889  
N 6.321467 8.712127 7.806471  
N 7.296006 8.672315 3.834969  
N 7.225893 10.754087 6.102986  
N 9.699804 6.838017 5.289305  
N 10.066442 9.591730 6.269751  
O 8.088140 6.193671 7.642550  
O 8.471262 9.154341 8.528470  
O 8.079158 5.969063 2.967988  
O 6.359476 2.571565 13.694235  
O 5.073392 12.000175 7.133029  
O 0.808703 6.179765 3.253045  
O -1.746081 6.396600 3.838073  
O 2.241549 2.361468 11.924279  
O 6.074904 6.989295 1.170375  
O 13.640098 9.374016 15.461666  
O 4.456050 8.896404 -0.423399  
O 12.734398 13.023046 11.871594  
O 10.314956 11.964052 11.326963  
O 8.345345 3.450768 12.236569

O 9.611745 10.689436 3.047198  
O 1.427945 7.762727 12.899842  
O 1.405911 -2.624342 14.583593  
O 2.184630 6.078351 9.626337  
O 8.142166 12.657692 3.892762  
O 13.391615 6.595458 11.587603  
O 2.970551 3.331595 0.780418  
O 13.636228 0.721385 4.906074  
O 3.174275 7.431577 17.502464  
O 12.804077 9.378573 10.897618  
O 2.312068 11.470237 10.316359  
O 14.734190 0.395737 11.938540  
O 18.582598 15.321936 9.539396  
O 9.617619 10.162478 -1.893809  
O -0.141062 2.910343 10.527123  
O 14.638881 13.969360 16.354094  
O 15.797790 -2.106770 -3.185534  
O 5.186109 4.752149 -0.464719  
O 3.168591 14.289939 -0.003428  
O 11.411666 19.882721 12.790731  
O -1.497423 4.707659 6.702077  
O 0.494205 4.768565 0.756476  
O 8.365490 -1.269311 10.709200  
O 12.398601 4.213784 15.403971  
O 11.067373 10.111451 9.121394  
O 14.832258 5.309267 9.542167  
O 0.697436 9.187316 10.670145  
O 1.695733 1.401992 14.391026  
O 5.148731 11.728994 14.538955  
O 6.573000 -1.194761 1.405746  
O 9.798915 1.531041 10.449324  
O 7.592347 10.167887 0.345204  
O 15.457460 15.415955 7.917755  
O 4.550800 0.126213 12.934064  
O 8.789265 12.364556 8.307495  
O 2.613188 3.897323 3.732280  
O 12.187589 8.310259 5.232865  
O 16.624928 -5.691500 15.500322  
O -1.537584 1.052812 0.067740  
O 4.585993 12.902601 9.470823  
O 12.130185 16.622343 12.017033  
O 12.189339 10.678224 13.330623  
O 5.725891 12.807695 11.966829  
O 2.610805 4.881687 -2.770141  
O -0.760570 6.541597 14.037831  
O 9.780787 0.346366 7.347420  
O 10.396116 4.441494 6.353896

O 1.096782 16.511744 3.824910  
O 11.121396 17.251785 4.985212  
O 7.435419 13.627654 6.273276  
O 9.158516 1.219708 3.242042  
O 8.165839 3.140380 2.377428  
O 10.318745 2.499137 1.535871  
O 8.482583 1.073016 0.914403  
O 14.097166 10.587505 4.214795  
O 12.843282 11.604256 2.394109  
O 12.107255 11.912124 4.670546  
O 14.069024 13.016506 3.899104  
H 6.719215 4.158693 8.168597  
H 4.570154 3.509052 7.445827  
H 3.474462 5.022756 5.629688  
H 4.740311 7.092838 4.818109  
H 7.482745 9.279788 10.978848  
H 5.199146 8.670811 11.559271  
H 3.582607 8.076835 9.668105  
H 4.317740 8.251801 7.296895  
H 6.629972 9.383348 3.501418  
H 6.809041 7.872655 3.521053  
H 8.264881 8.708839 3.448295  
H 6.346207 11.095154 6.458372  
H 7.448756 11.343639 5.274808  
H 7.883202 11.028807 6.887701  
H 10.654832 7.254437 5.059661  
H 9.012506 6.606556 4.494314  
H 10.067167 5.927540 5.820198  
H 9.735979 9.979080 5.391367  
H 11.030905 9.216837 5.971695  
H 10.220695 10.242406 7.019517  
H 7.459532 6.231848 2.245966  
H 8.375208 5.042439 2.758850  
H 6.917053 2.898458 12.955948  
H 6.880887 1.954806 14.195341  
H 4.916904 12.261167 8.092021  
H 4.191899 12.012665 6.710717  
H 1.565412 6.568022 2.788122  
H 1.253682 5.439633 3.712671  
H -1.615988 5.680400 4.409698  
H -0.748766 6.608753 3.689224  
H 2.042682 2.036177 12.802944  
H 2.518478 3.261751 12.242312  
H 5.911325 6.452489 0.405963  
H 6.065711 7.934864 0.860347  
H 14.598351 9.178929 15.478803  
H 13.623184 9.983243 16.224541



H 3.619412 8.449522 -0.741204  
H 4.313430 9.904915 -0.367708  
H 12.724650 12.295763 12.523336  
H 12.640216 13.851287 12.336063  
H 9.987928 11.207346 12.023075  
H 11.066040 12.509604 11.661983  
H 9.150146 3.970000 12.574122  
H 8.704467 2.844818 11.571209  
H 10.590921 10.510499 2.958934  
H 9.628825 11.584395 3.456319  
H 1.779578 8.479475 13.441750  
H 0.578842 7.441877 13.303885  
H 0.741252 -2.217006 15.069895  
H 2.283135 -2.046764 14.674552  
H 1.330252 5.615863 9.413297  
H 2.745180 5.841147 8.820305  
H 7.566765 13.057519 3.162847  
H 8.166407 13.338198 4.642190  
H 12.652585 5.976950 11.864649  
H 13.073073 7.476214 11.311134  
H 3.730523 3.857052 0.366608  
H 2.154494 3.915377 0.866470  
H 13.259656 -0.142302 4.583755  
H 13.749987 0.826018 5.856275  
H 3.976645 7.041980 17.064053  
H 3.584312 8.087801 18.105505  
H 12.096742 9.443050 10.220306  
H 13.670656 9.462850 10.443732  
H 1.966188 10.585928 10.546641  
H 1.680991 12.112956 10.845185  
H 15.168516 -0.429786 11.797504  
H 14.469944 0.461438 12.900764  
H 18.620993 15.769817 10.449968  
H 17.648626 15.291266 9.303643  
H 8.958853 10.157081 -1.196016  
H 10.554059 10.127209 -1.527464  
H 0.733347 2.938591 11.087968  
H -0.485800 2.193216 11.022490  
H 15.378686 14.643478 16.420900  
H 14.637794 13.675073 17.248203  
H 14.865434 -2.436094 -3.367653  
H 15.977931 -2.416882 -2.202393  
H 4.953470 5.270269 -1.273602  
H 5.660260 3.927571 -0.702712  
H 2.583009 15.101126 -0.119339  
H 3.961116 14.453055 -0.551920  
H 11.752691 19.007185 12.693755

H 11.498887 20.035267 13.765261  
H -0.906131 5.115502 7.394170  
H -2.372233 4.876191 7.130100  
H 0.440710 5.245793 1.664729  
H 0.350709 5.556496 0.112282  
H 9.060299 -1.903363 11.074084  
H 7.598659 -1.292749 11.284042  
H 13.218141 4.671875 15.623115  
H 12.133134 3.593980 16.125841  
H 10.396312 9.398222 9.061942  
H 10.748296 10.768349 9.784722  
H 14.407058 5.762100 10.331059  
H 14.444326 4.346111 9.654708  
H 0.840535 8.671062 9.857158  
H 1.045012 8.557525 11.317295  
H 2.138896 2.159956 14.771203  
H 0.812332 1.671577 14.761806  
H 5.322434 12.513129 15.016429  
H 5.533427 11.912515 13.603389  
H 5.733198 -0.805194 1.674728  
H 7.112470 -0.474014 0.936749  
H 9.530823 0.590955 10.484625  
H 10.096330 1.557509 9.541417  
H 8.241564 10.046789 1.048363  
H 7.280565 11.125729 0.282246  
H 14.897534 15.340280 8.724822  
H 15.254430 14.521636 7.584779  
H 5.197906 0.869026 12.938128  
H 3.717249 0.496031 13.074959  
H 8.560061 12.896621 9.118967  
H 9.773356 12.547893 8.229640  
H 2.000602 3.165048 3.910265  
H 3.003640 3.633449 2.878206  
H 12.600228 9.090664 4.823278  
H 12.629820 7.544214 4.710099  
H 17.314240 -6.216680 15.928300  
H 16.834677 -4.732881 15.487646  
H -1.382589 0.066083 0.297548  
H -2.464085 1.210136 -0.255892  
H 4.394522 13.834040 9.276421  
H 3.800488 12.388205 9.831558  
H 11.421155 16.675127 11.307575  
H 12.933784 16.206070 11.648978  
H 12.728518 10.091126 13.964683  
H 12.183689 10.341991 12.353582  
H 5.282137 13.674081 12.311349  
H 5.593152 12.797200 11.029844

H 2.161065 5.553840 -2.157885  
H 2.559926 5.403685 -3.648326  
H -1.197903 6.448661 13.134637  
H -1.329038 7.092945 14.619757  
H 8.959987 -0.127633 7.113015  
H 9.981080 0.720333 6.499783  
H 9.950434 4.147944 7.169757  
H 10.605660 3.544153 5.872034  
H 0.122134 16.376526 4.110540  
H 1.594600 16.213669 4.558198  
H 10.442472 16.927383 4.382880  
H 11.984040 16.781107 4.905951  
H 6.508036 13.813994 6.173231  
H 7.685457 13.062421 7.050003  
Cl 11.052815 7.167046 8.227316  
Cl 4.501234 9.459190 4.867883  
Cl 9.027819 1.985163 2.018789  
Cl 13.282883 11.744614 3.772196

## 12.6 Dichloro complex 3<sup>HT</sup>

238

Last snapshot from equilibration trajectory

Pt 9.04661521 7.24680213 6.84965797  
Pt 6.73181450 7.54990851 5.74623663  
C 6.66412899 5.66282128 7.83348686  
C 6.03254186 4.42277209 8.16324662  
C 4.65685217 4.38041502 7.98663407  
C 3.86921837 5.52866088 7.64170050  
C 4.59332526 6.64612257 7.36103518  
C 7.65693387 9.80293061 7.76405562  
C 7.66577160 11.08479797 8.43122856  
C 9.82035047 9.36187393 8.70809880  
C 8.74969429 11.40427062 9.19893770  
C 9.93540624 10.59746083 9.31586379  
N 5.93279125 6.66740380 7.33847030  
N 6.41009537 5.79132955 4.80918960  
N 7.43347882 8.44258055 3.98231348  
N 9.60853762 5.72903358 5.58103055  
N 10.19485881 8.58763176 5.68909175  
N 8.75675082 8.95048254 7.99028209  
O 8.03477456 5.83743611 7.92999041  
O 6.69522667 9.45670810 6.94156236  
O 2.07914431 2.40636647 8.38167886  
O 10.26974634 3.35083848 8.59948234  
O 0.91582820 9.34186404 10.04328364

O 5.24320645 6.83415929 13.62673806  
O 5.75784116 3.40221199 1.35512717  
O 1.14517851 0.91832794 12.66173208  
O 0.51244528 13.84652597 10.46574185  
O 13.86879593 4.74793728 10.71536432  
O 5.32795087 7.71282332 1.50696438  
O 13.40555831 2.16655108 14.52014793  
O 5.48557108 9.87727480 14.27765052  
O 14.11987102 1.50585784 10.57640618  
O 13.25189625 12.01699146 4.20942367  
O 2.08582847 14.19115078 6.40601860  
O 3.44417265 4.14880289 14.85262972  
O 1.11661271 9.44791416 13.12252130  
O 12.77773263 9.73255746 6.16798964  
O 14.98260452 4.29057287 7.20952319  
O 5.31158390 11.27952763 4.25075503  
O 10.43684059 12.52514964 5.73031462  
O 9.33356322 3.66638356 13.14046430  
O 13.26079561 8.92210629 9.19449484  
O 4.98465579 13.61320444 8.13706208  
O 12.17599725 3.02117897 12.27686280  
O 12.14595409 14.70551889 7.64486055  
O 10.08551385 16.38916651 1.44760146  
O 2.73502390 8.94862168 8.06247170  
O 13.43114798 9.68902635 14.23097483  
O 11.16376901 3.20134801 3.46615406  
O 2.54954520 6.83554815 1.20882225  
O 1.47321393 12.76356523 4.13449059  
O 7.71963269 13.43268756 5.50077031  
O 1.67469532 7.36773396 5.99991784  
O 4.21667921 10.97308848 8.57808149  
O 2.00879769 11.05638285 1.41723898  
O 13.01323291 11.89472485 11.20532468  
O 9.56654347 12.67189965 -0.01766018  
O 9.31019522 3.49146976 0.70919242  
O 0.61800230 4.83957155 13.05616272  
O 5.63920516 1.41289043 14.15095859  
O 2.79480306 12.94978591 12.40156055  
O 6.89799373 1.48288840 2.96870779  
O 10.58552096 1.26293032 10.71198259  
O 11.66447973 13.31707454 13.64958501  
O 7.48837468 13.46690761 2.70706138  
O 7.04427113 0.90840756 6.84753776  
O 7.42468319 5.74324642 2.26114823  
O 3.87658280 0.17938157 12.65970753  
O 8.64153170 10.78046087 2.95817542  
O 13.51953398 2.18354510 5.81861942

O 1.28546495 2.36952189 -0.20818533  
O 6.75571443 14.66423161 10.70363773  
O 11.73438036 9.16847153 11.90334636  
O 14.53965881 14.21825315 13.91757419  
O 6.40896553 13.27416353 13.66188178  
O 4.22790775 0.99244996 6.90767003  
O 2.35641563 6.92234479 13.82187901  
O 15.22647529 4.74906162 3.12743282  
O 9.74900487 2.39321098 6.01240331  
O 13.32195402 11.66465170 8.13805675  
O 5.01489655 11.79461356 1.36216194  
O 11.65719887 6.59458663 11.96747871  
O 4.61791939 3.07363874 4.68192722  
O 3.74941324 5.28349669 4.58467197  
O 2.27732648 3.42883433 4.70685803  
O 3.42892206 3.81288658 2.69456619  
O 11.10048307 5.80809560 1.59035521  
O 10.41322305 7.73845398 2.80854415  
O 12.70882827 7.47530238 2.10731577  
O 11.76548319 6.10316879 3.86794731  
H 6.62131271 3.54008165 8.43144888  
H 4.13035296 3.44205960 8.21578196  
H 2.77831635 5.51125794 7.58878623  
H 4.16419272 7.56426788 7.02828395  
H 5.35826667 5.64396535 4.85470983  
H 6.83187385 5.07204229 5.40285182  
H 6.63839329 5.74236325 3.78371628  
H 7.02633415 7.95046623 3.18222548  
H 8.44668563 8.40338923 3.85972159  
H 7.24170101 9.44360474 3.85949458  
H 10.05198749 5.02068932 6.18198735  
H 10.40838593 6.09667831 4.99153922  
H 8.90838234 5.26586570 5.00373615  
H 9.85071595 9.56906133 5.67321961  
H 10.23598494 8.27118740 4.69904636  
H 11.17705016 8.72324710 6.07580545  
H 6.84437883 11.78044020 8.27873632  
H 10.64215279 8.65637701 8.77604718  
H 8.80255186 12.36096524 9.70517006  
H 10.85542948 10.85436595 9.87222004  
H 1.46325288 3.17264064 8.17869060  
H 1.43874672 1.65591707 8.50705217  
H 10.01743028 3.02595056 7.70726765  
H 10.25582855 4.32829999 8.54299319  
H 0.95514559 9.23853021 11.01700975  
H 0.14431903 8.77601798 9.81603166  
H 5.54811417 7.01975170 14.54330354

H 5.88138264 7.39597330 13.13386734  
H 4.79628569 3.31445798 1.51392610  
H 6.17580415 2.74765410 1.97566037  
H 0.59188788 1.17229203 11.88070422  
H 1.19547937 1.77536357 13.17668787  
H 1.34539345 13.60157153 10.92690252  
H -0.14158215 13.48811538 11.08769166  
H 13.63535704 4.49403217 9.79570055  
H 14.77240664 5.11506828 10.65057633  
H 5.13093112 7.50641641 2.44804836  
H 4.37472906 7.66539717 1.14509737  
H 13.94101254 1.49972829 14.02120056  
H 14.21609692 2.66082790 14.81659332  
H 5.35604459 10.79613581 14.58019233  
H 4.86902269 9.39869684 14.84874997  
H 13.93341673 0.69844039 10.07248914  
H 13.25729524 1.77620839 10.94623031  
H 13.63500105 12.02768231 3.31399058  
H 12.53029736 12.67850029 4.12567381  
H 1.82765002 13.56914398 7.10236176  
H 2.83328997 14.73934598 6.73973929  
H 3.32577394 3.97761157 13.90991707  
H 4.09579187 4.86703446 14.91693652  
H 0.33866263 9.42231676 13.75285099  
H 1.68256675 10.19766443 13.41286925  
H 13.31107635 10.10689932 6.89574042  
H 12.73742365 10.47095019 5.52308967  
H 14.55853196 3.63177681 6.58911358  
H 14.67337931 5.15540347 6.88327409  
H 5.33927010 10.31437979 4.17073716  
H 5.21356730 11.42410536 5.19917807  
H 9.53324841 12.64179100 5.39288069  
H 10.63698049 13.34861725 6.22079495  
H 10.19212869 3.28629205 12.86222633  
H 8.98901307 4.20545986 12.41407231  
H 12.63484554 8.89414329 9.95450521  
H 13.61071922 9.82721651 9.24268853  
H 5.70455619 13.84244760 8.77745577  
H 4.62269532 12.73024274 8.44929112  
H 12.63387055 2.90486486 13.16777383  
H 12.72034269 3.57483064 11.70486089  
H 12.84727225 14.05737397 7.85502278  
H 11.92909142 15.10918329 8.51185291  
H 9.65955083 15.97766484 2.20044963  
H 9.41951537 17.02814500 1.14370202  
H 2.33965222 8.52219644 7.25324700  
H 2.01627114 9.16507950 8.73672163

H 13.09245774 9.41164379 13.36967761  
H 13.26820261 9.00563084 14.89059218  
H 11.25723446 4.15042266 3.20405064  
H 11.67079920 2.77858128 2.75106653  
H 2.21537805 6.68225342 0.26176296  
H 2.58459614 6.05603106 1.80320744  
H 0.70362160 12.27868077 4.47925227  
H 1.94874940 13.08615997 4.93749684  
H 7.02461481 13.87777136 6.04008205  
H 7.35973710 12.54108101 5.31756668  
H 2.10201138 7.06957818 5.16985221  
H 0.76042126 7.60569944 5.76839654  
H 4.93574918 10.90325531 7.92787808  
H 3.68486540 10.11336869 8.49281714  
H 2.07328073 11.17490732 2.38309734  
H 1.68854165 10.13251680 1.29151628  
H 13.97628458 12.02572489 11.27156852  
H 13.01383028 11.06185505 11.73365813  
H 10.48247359 12.93482287 -0.31237430  
H 9.37653294 13.32387439 0.67891784  
H 9.37752044 3.95256834 -0.14899068  
H 9.70738759 4.03551411 1.41084291  
H -0.16164334 4.96124268 13.61881538  
H 1.31367412 5.51470191 13.26600358  
H 6.01707797 2.30334996 14.30957998  
H 5.94129940 0.85480273 14.88840958  
H 3.22869374 12.55104276 11.62172048  
H 3.48217290 13.58297698 12.76450808  
H 7.08098464 0.53506596 2.78917597  
H 6.49373831 1.48293778 3.85244242  
H 11.06465364 1.91486879 11.26555083  
H 9.82540872 1.72209748 10.32684508  
H 11.63156465 14.16709427 13.17639264  
H 12.58779756 13.03552506 13.52058438  
H 7.47126369 13.23546812 3.65266526  
H 6.70573883 13.01255852 2.31550468  
H 6.19943939 1.21431487 7.23848447  
H 7.55981993 1.61076935 6.40978324  
H 7.17949904 6.40257380 1.57494183  
H 7.01362969 4.86899461 2.03878829  
H 2.97765541 0.59227625 12.55116483  
H 4.49792630 0.82831306 13.06820834  
H 8.13310655 11.61365839 2.92368056  
H 9.05062864 10.86143120 2.06857710  
H 13.06939772 2.01455455 4.97575014  
H 12.82835177 2.01716202 6.49516745  
H 1.53374787 1.71961794 0.47698562

H 1.68499738 3.17570493 0.20349494  
H 7.26295888 15.49174235 10.80058321  
H 6.15053965 14.61337448 11.46481014  
H 12.00155826 8.21030020 11.93736354  
H 10.78780288 9.18175887 12.14070295  
H 15.44399195 14.42001772 13.59248065  
H 14.59125120 13.74471118 14.76850337  
H 6.73592275 12.72136199 12.91160329  
H 7.26994882 13.49469376 14.09368719  
H 4.26238902 1.67624962 6.19323381  
H 3.54240330 1.32341606 7.53153433  
H 3.26111430 6.92606357 13.42186858  
H 1.89261090 7.74855452 13.52885088  
H 15.83028698 4.66802448 3.88195068  
H 14.86293088 5.64851165 3.17426392  
H 10.37079625 3.04005371 5.58146716  
H 10.16215155 1.50914656 5.88424757  
H 13.50839704 11.88562143 9.07851680  
H 12.36390760 11.90211842 8.10667783  
H 4.46279765 12.31333689 0.74145049  
H 4.36080264 11.56614605 2.05541625  
H 11.66472641 6.40719745 11.03799515  
H 12.27492037 5.88330338 12.18115932  
Cl 11.19882363 6.65734951 8.08833393  
Cl 4.53177061 8.25257272 4.81171634  
Cl 3.50583243 3.84297730 4.16235646  
Cl 11.49134752 6.79909998 2.54103770

## 12.7 Aquabromo complex 4<sup>HH</sup>

242

Last snapshot from equilibration trajectory

Pt 6.879545 7.067048 5.408997  
Pt 9.273239 7.519839 6.361329  
C 7.505095 5.660323 7.990326  
C 7.267428 4.684796 9.032274  
C 6.178752 3.826342 8.914199  
C 5.358647 3.914922 7.762199  
C 5.641345 4.798493 6.749343  
C 7.214974 9.192614 7.535758  
C 6.797464 9.935707 8.663071  
C 5.454557 9.878069 9.049102  
C 4.490196 9.166479 8.314343  
C 5.050847 8.360132 7.297905  
N 6.704047 5.734295 6.862333  
N 6.323900 8.415789 6.936104



N 7.298145 5.677219 3.874859  
N 6.537194 8.554503 4.010330  
N 10.196840 5.805346 5.493716  
N 10.181776 8.550149 4.798124  
O 8.617420 6.432603 8.005084  
O 8.482998 9.145544 7.231853  
O 4.445278 6.615417 4.580266  
O -2.207904 4.646428 0.170252  
O 10.479728 3.321460 15.600377  
O 2.287393 9.360392 1.864329  
O 2.663076 8.514663 4.265144  
O 5.333933 0.163589 8.086873  
O -1.300096 7.553896 11.916457  
O 0.031009 8.075497 5.574570  
O 11.316918 7.240303 11.117797  
O 3.524367 11.009924 5.637875  
O 5.523199 5.611295 17.089039  
O 18.477337 12.454756 10.633471  
O 16.512417 -1.489813 9.512369  
O 13.617976 10.719238 4.124900  
O 1.103426 13.360336 6.858067  
O 1.303581 0.926643 11.604803  
O -4.581305 9.345389 13.204406  
O 12.901052 8.316421 4.181562  
O 10.643780 12.238909 -3.989473  
O -1.218867 13.119556 1.451021  
O 9.841566 11.191923 5.772626  
O 1.646756 11.943168 17.235317  
O 14.475658 4.012192 9.076466  
O -1.785914 12.595386 12.678636  
O 12.975559 3.475025 6.560289  
O 15.774128 11.536045 11.116200  
O 14.778687 18.423134 11.693501  
O 10.547826 5.229997 17.879633  
O 12.922936 11.017591 15.423180  
O 5.886487 -2.296918 6.385139  
O 17.362438 0.131356 5.195748  
O 8.446324 13.291679 7.119367  
O 18.987820 12.397419 7.997011  
O -0.195300 10.475570 6.847988  
O 3.815984 4.327700 3.473778  
O 11.403427 4.789224 10.522495  
O 12.279121 2.446165 12.556495  
O 15.765260 15.104067 3.028982  
O 10.858960 4.208071 7.815443  
O -5.058827 6.707702 14.343410  
O 7.326060 0.324787 15.257251

O 5.977374 13.522791 11.472177  
O 13.365038 4.145538 3.986313  
O 8.256336 1.508324 11.376231  
O 9.266025 14.204379 -2.447360  
O 7.126075 10.950698 5.109348  
O 8.622162 -1.922840 9.812729  
O 5.649075 16.417763 10.854036  
O 1.072026 3.841728 2.781844  
O 10.283968 15.079222 15.403625  
O 12.627667 5.546920 13.097463  
O 3.226983 -2.078485 3.932036  
O -2.149225 8.334791 14.739734  
O 10.087953 11.393486 15.260329  
O 14.428951 13.371864 4.626468  
O 9.457192 19.373903 12.734776  
O 0.001706 6.553678 8.284830  
O 6.637650 12.870886 14.245062  
O 9.217267 7.698689 2.315677  
O 13.187213 6.297364 2.411192  
O 15.128258 8.835057 9.494070  
O 8.668334 3.562682 5.794098  
O 6.534039 9.954611 -0.730725  
O 7.807137 10.224634 1.245358  
O 5.554733 9.303430 1.419613  
O 7.263929 8.016011 0.323527  
O 5.635142 -0.400601 4.626871  
O 5.534691 1.650002 3.337905  
O 4.399837 1.493662 5.461610  
O 6.676883 1.699970 5.390504  
O 10.044369 16.032082 4.164168  
O 11.037882 16.271315 6.319940  
O 11.440537 14.302557 5.066115  
O 12.461108 16.304033 4.322044  
H 7.822447 4.714982 9.946033  
H 5.939429 3.165922 9.710906  
H 4.519423 3.209932 7.610514  
H 5.019506 4.828541 5.883592  
H 7.633778 10.372220 9.227866  
H 5.031202 10.437397 9.857049  
H 3.459310 9.117939 8.630579  
H 4.416646 7.640097 6.728611  
H 6.729203 5.898789 3.074027  
H 7.243684 4.678990 4.138501  
H 8.327627 5.791058 3.583769  
H 5.658993 8.243811 3.534724  
H 7.311393 8.558621 3.314500  
H 6.309531 9.488326 4.383522

H 9.641073 4.937237 5.642810  
H 10.908176 5.658046 6.210825  
H 10.622973 5.775170 4.543892  
H 10.089067 9.607329 4.973267  
H 9.914637 8.290932 3.850818  
H 11.127972 8.408977 5.158535  
H 4.337749 5.728801 4.097016  
H 3.882776 7.366961 4.068992  
H -2.108449 5.198374 -0.605417  
H -3.137541 4.366836 -0.069083  
H 9.857475 3.522756 14.860473  
H 10.283842 2.426945 15.997828  
H 1.834601 10.267542 1.769562  
H 1.847882 8.668901 1.364717  
H 1.948839 8.132243 4.806913  
H 2.323030 8.900241 3.383893  
H 4.915624 -0.691771 8.214873  
H 5.568753 0.167294 7.134902  
H -1.971652 7.547098 11.148934  
H -1.557114 8.053905 12.667147  
H -0.955699 7.991427 5.442149  
H 0.246618 7.274491 6.148664  
H 10.884233 7.626793 10.337995  
H 11.203968 7.905197 11.864738  
H 3.455487 11.686015 4.911911  
H 3.387985 10.147064 5.202858  
H 4.710534 5.117447 17.256147  
H 5.303517 6.288865 16.436604  
H 17.843910 13.175528 10.160259  
H 19.194927 12.939048 11.064178  
H 15.650419 -1.781071 9.918460  
H 16.264233 -1.634731 8.520068  
H 13.759524 11.648004 3.904633  
H 14.532928 10.362981 3.957266  
H 1.849883 12.719784 6.989911  
H 0.375205 12.830154 6.372960  
H 2.208582 0.724477 11.857606  
H 1.317794 0.625383 10.670067  
H -5.387492 9.008134 13.576699  
H -3.781515 9.141677 13.708838  
H 13.009365 9.259642 3.901465  
H 12.950537 7.779498 3.309769  
H 10.036965 12.612416 -4.708772  
H 10.703544 11.291017 -4.120479  
H -1.692482 13.990955 1.323401  
H -0.421962 13.422858 1.876993  
H 10.458724 11.915759 5.476541

H 9.626531 11.180162 6.705567  
H 2.201270 12.384912 17.923786  
H 1.812612 12.422140 16.398497  
H 15.024583 4.795530 8.927500  
H 14.175355 3.830412 8.179060  
H -2.575111 12.410194 12.196796  
H -1.944280 12.312648 13.633595  
H 12.192607 3.767060 7.106696  
H 12.933278 2.521390 6.562972  
H 16.673546 11.957415 11.237120  
H 15.241638 11.996607 11.808314  
H 15.400797 17.692154 11.484995  
H 14.668029 18.897289 10.786851  
H 10.461318 4.371138 17.357193  
H 11.493245 5.496958 17.788687  
H 12.005944 11.325271 15.283006  
H 13.400750 11.615253 16.012722  
H 5.097353 -2.745842 6.610058  
H 5.803396 -1.734647 5.597593  
H 18.187315 0.495181 5.564260  
H 16.947941 -0.295695 5.958293  
H 8.737424 14.104200 6.678065  
H 7.514250 13.122745 6.769249  
H 18.764360 11.550740 7.560498  
H 18.989359 12.190231 9.003778  
H -0.050518 9.532042 6.488870  
H -0.999458 10.739637 6.442271  
H 2.870764 4.136796 3.189922  
H 4.224361 3.444001 3.569176  
H 11.381843 5.560890 11.119516  
H 11.839029 4.010152 10.922838  
H 13.185034 2.424162 12.261587  
H 12.192023 1.904454 13.400419  
H 16.499672 15.491323 3.554028  
H 15.024081 15.704386 3.219131  
H 10.156617 3.556023 7.754304  
H 11.028478 4.387542 8.801809  
H -5.771258 6.179911 13.926546  
H -4.358709 6.508265 13.697904  
H 8.336833 0.365994 15.195508  
H 7.111917 1.000857 14.557935  
H 6.314966 13.428024 12.412324  
H 6.803699 13.366984 10.987974  
H 12.649505 3.675501 3.541964  
H 13.241863 3.948008 4.937248  
H 7.302485 1.203508 11.034671  
H 8.537701 0.748851 11.988601

H 9.885420 13.532516 -2.748522  
H 8.464643 13.768434 -2.071860  
H 8.064628 11.172755 4.832445  
H 6.796204 11.849977 5.447084  
H 8.649204 -1.755176 8.845915  
H 8.638114 -0.980043 10.104361  
H 5.491138 16.348087 9.875608  
H 5.485723 15.462018 11.242394  
H 0.384131 4.447644 3.163725  
H 0.912356 3.727828 1.846386  
H 10.143577 14.838842 14.425655  
H 9.930212 14.264914 15.805803  
H 13.220983 6.139419 12.581030  
H 12.872538 4.666456 12.711442  
H 3.957494 -1.557015 3.549985  
H 2.777631 -1.415330 4.496621  
H -2.294115 9.286867 15.019671  
H -2.843971 7.815461 15.230469  
H 10.324264 11.092708 14.358924  
H 9.248679 10.937924 15.462978  
H 14.975491 14.191790 4.384408  
H 13.539800 13.794853 4.822284  
H 10.318778 19.754850 12.486728  
H 9.318248 18.489071 12.319611  
H 0.058041 7.352814 8.876233  
H -0.901312 6.682313 8.022654  
H 6.366449 11.949581 14.536243  
H 6.723912 13.415935 15.044582  
H 9.096353 8.013435 1.359946  
H 9.715109 6.895705 2.098113  
H 13.507643 5.976558 1.522943  
H 13.394163 5.564564 3.051041  
H 15.489909 9.187429 10.351665  
H 15.432443 9.612015 8.966379  
H 9.251909 2.853148 5.513188  
H 7.916542 3.073977 6.096116  
Br 11.163037 8.002192 7.805938  
Cl 6.784286 9.386322 0.597697  
Cl 5.564610 1.089637 4.695157  
Cl 11.283725 15.734462 4.962763

## 12.8 Aquabromo complex 4<sup>HT</sup>

242

Last snapshot from equilibration trajectory

Pt 9.02787592 6.89533964 7.61313445

Pt 6.85293655 7.71461094 6.29338305  
C 6.26869262 6.57359912 8.98128866  
C 5.47676810 6.29501324 10.16807514  
C 4.09525939 6.31903991 10.00233950  
C 3.47876352 6.54267870 8.74581195  
C 4.25815378 6.84077762 7.66469169  
C 8.01460038 9.54023495 8.41277857  
C 7.80343959 10.71777271 9.21632245  
C 10.21416962 9.16791495 9.22044199  
C 8.95030296 11.16263120 9.85674266  
C 10.15798609 10.41198709 9.79949344  
N 5.65346090 6.91245693 7.79559301  
N 6.32637531 5.96415209 5.08832471  
N 8.03043927 8.81213073 5.11396701  
N 8.84417373 4.96090760 6.89563368  
N 10.63616643 7.39658797 6.39810534  
N 9.13647626 8.75767742 8.42140362  
O 7.60261687 6.41731348 9.09216683  
O 5.30393935 9.25540730 5.38348661  
O 7.06501237 9.33473151 7.51059168  
O 1.62631374 1.23423580 6.93462846  
O 14.28349990 3.07332443 10.02475127  
O 6.10884697 12.52872757 11.37425462  
O 2.20058747 4.54415593 6.77756856  
O 0.18904390 1.39859004 1.44562599  
O 2.77523072 4.47811621 13.06609437  
O 3.48867585 8.28588943 3.65639181  
O 11.29535418 8.59916570 13.75133632  
O 10.37845965 10.24240977 4.74974278  
O 14.22128832 0.31340451 14.15902384  
O 9.18039389 12.92845984 12.50909220  
O 11.42637392 4.53566189 13.42829717  
O 13.74938169 9.69713025 1.70936023  
O 4.06752794 14.69454715 6.94190144  
O 3.27912227 8.20402872 13.91825541  
O 1.78745402 1.74216806 11.19291241  
O 12.73881767 12.85644492 5.88272714  
O 12.49392145 13.17442177 12.56047665  
O 1.85715464 10.13768281 4.46519256  
O 8.52177487 15.75429849 8.09214920  
O 7.83781674 3.13179032 13.29821931  
O 13.84089185 2.70229035 6.26860238  
O 3.98398078 10.04060124 7.56527739  
O 14.49109437 8.21366994 10.97897284  
O 8.12278086 15.01978727 4.88392137  
O 4.09074815 13.58700730 3.48282973  
O 7.11392255 2.88429883 5.76103950

O 14.56938047 13.02923885 10.63883410  
O 12.88480245 2.65791822 2.47150219  
O 8.03117546 2.53676319 2.50615017  
O 2.20189275 12.77194543 -0.00881440  
O 13.47030948 10.57343949 13.63572331  
O 0.89302929 3.84642494 4.30988471  
O 4.66383283 12.68899221 8.78566980  
O 7.81709804 3.60342855 9.41498069  
O 13.77047181 6.67503811 13.46580437  
O 9.89027491 12.87793000 3.20632958  
O 12.87741839 5.99313911 1.35219543  
O 2.97215497 9.71943769 10.39392581  
O 2.08336242 2.00973118 14.00062847  
O 4.48187383 11.24180110 14.53095267  
O 9.95688028 3.03253795 4.22236080  
O 9.34337207 0.75192515 12.27036132  
O 10.24023857 13.24932360 7.32910446  
O 6.69865358 7.85187879 2.88511290  
O 5.25735602 2.09635723 14.24607265  
O 0.77991097 9.03704484 -0.32081355  
O 1.10162824 6.56721006 13.01654102  
O 12.18570652 9.94473920 6.95551465  
O 10.08792104 2.90448989 8.05343572  
O 3.65317758 1.50171752 4.58076106  
O 1.96928946 13.83999289 9.59505666  
O 5.99360638 9.47720029 13.06052211  
O 11.65693575 5.13985472 4.61012942  
O 1.46007746 11.24153679 12.71907347  
O 3.82241497 2.23642697 9.14886999  
O 4.33004913 14.46077472 13.14011871  
O 9.85351257 3.80038204 0.83115789  
O 14.44380612 0.24902248 5.25606857  
O 9.06141766 10.47235862 13.70211867  
O 10.94610547 8.38421196 2.58114559  
O 7.16250976 11.01412156 3.41533179  
O 6.44426068 12.71673225 2.06802289  
O 5.11005909 10.61688108 2.22850298  
O 7.24780853 10.64925854 1.10224420  
O 5.23423003 6.04457389 1.29492121  
O 6.88635526 5.13794466 2.59371809  
O 5.70607049 3.68041623 1.13467177  
O 4.60564131 4.65577721 3.10463283  
O 14.65132001 12.53093605 2.29637686  
O 12.56318257 13.42483319 2.72046513  
O 12.93156728 12.33684712 0.66031923  
O 13.90227979 14.49184571 1.15774486  
H 5.95592750 6.07303601 11.13240274

H 3.49845033 6.06228793 10.87466236  
H 2.38313395 6.46315066 8.71684078  
H 3.90425948 6.99380836 6.64775697  
H 5.29675109 5.89470469 5.07705516  
H 6.72624954 5.09056752 5.44938987  
H 6.63937346 5.96918477 4.13263826  
H 7.49128509 9.46787873 4.50297395  
H 8.55332415 8.17414459 4.53476660  
H 8.67369786 9.34091681 5.71387948  
H 7.89757658 4.57218509 7.06472704  
H 9.52376713 4.26365116 7.29270922  
H 8.98931505 4.88063415 5.86745544  
H 11.23595672 8.09590586 6.90635779  
H 10.43837576 7.85597708 5.50821368  
H 11.22732104 6.58892001 6.17466262  
H 4.58710465 8.87087036 4.79900122  
H 4.72417423 9.55096772 6.19672521  
H 6.83746315 11.23412402 9.24780718  
H 11.08430193 8.50541578 9.25823241  
H 9.01371470 12.10667468 10.41625271  
H 11.00134916 10.82296591 10.34864540  
H 2.14091326 1.42973003 6.12135768  
H 0.80035912 0.85976564 6.54776861  
H 14.98226461 2.36352161 10.05888617  
H 13.41121598 2.63803684 10.10951632  
H 7.07372537 12.68605019 11.49304195  
H 6.02891451 11.59087775 11.73978784  
H 1.85264564 3.99039258 7.49372197  
H 1.71793999 4.24733603 5.97113151  
H 0.33618137 0.47135282 1.15743166  
H 0.96351047 1.72738956 1.93601192  
H 3.75528514 4.50657003 13.00436960  
H 2.55125504 3.61336336 13.58439858  
H 2.84477475 8.99800013 3.52980597  
H 3.51882625 7.81277167 2.83278213  
H 10.53719923 8.29368862 13.23368715  
H 11.99537779 7.90485626 13.56482130  
H 10.01161306 11.12524937 4.73621391  
H 10.32968547 9.86611682 3.84980652  
H 13.50617975 0.74291674 13.67680182  
H 13.88507730 0.22817888 15.08661576  
H 9.39666078 12.08119056 13.01371958  
H 10.05535230 13.37697561 12.28679367  
H 11.27739262 4.14907634 12.55241535  
H 12.34806104 4.84849374 13.48142727  
H 13.86494694 10.31371011 2.44725501  
H 13.90555932 8.76824015 1.99631491



H 3.30160946 14.79507417 7.52182809  
H 3.87957774 15.35620993 6.24385480  
H 3.46770575 7.44143414 14.48066656  
H 2.71400866 8.78040239 14.44754306  
H 1.61385493 1.17516950 10.42175289  
H 2.41653603 2.38215195 10.82442371  
H 13.48110372 12.77811691 6.49924146  
H 12.97933715 13.74437153 5.50417581  
H 13.01991353 13.29963699 13.39900854  
H 12.42578647 12.17575309 12.54882699  
H 1.56038232 10.96459665 4.05451223  
H 1.50932862 10.12963840 5.37891935  
H 7.83840000 15.53705431 7.43510539  
H 8.94703091 14.90362556 8.37222347  
H 8.01629374 3.33856576 14.23421429  
H 6.91575930 2.79459024 13.39573411  
H 12.97743408 3.16984407 6.25598146  
H 14.39841491 3.25405294 5.64425438  
H 4.50859057 10.68806420 8.02436376  
H 3.70426488 9.37107503 8.18670204  
H 15.22765027 7.58255573 11.02033322  
H 14.76335042 8.88341417 11.62346516  
H 7.72675453 14.74092335 4.02083907  
H 9.02346614 14.62448679 4.81840916  
H 3.45368964 13.24036096 2.86406377  
H 4.97741065 13.22355981 3.23253448  
H 7.67671297 2.49113545 6.43774340  
H 7.27600584 2.40454711 4.94796209  
H 14.74241913 13.96805287 10.43550685  
H 13.70007433 13.07319949 11.14503903  
H 12.10601010 2.26674588 2.00146513  
H 13.64077443 2.18638533 2.02922768  
H 8.43758446 2.86998326 1.63765925  
H 7.14633409 2.18044880 2.30177493  
H 2.42525807 11.80938713 -0.03948507  
H 1.35179674 12.84172061 0.48920953  
H 13.29849584 10.82929214 14.54363680  
H 12.89551525 9.85255185 13.39624998  
H 1.25973162 2.95271206 4.31900332  
H 1.44171163 4.36296039 3.70098856  
H 5.22885277 13.01217351 9.53676731  
H 4.61107180 13.30863462 8.03927916  
H 6.92703718 3.26194039 9.35958040  
H 7.76480397 4.55727146 9.62046532  
H 13.82964430 6.65512474 12.47912051  
H 14.74495573 6.71003027 13.58105009  
H 9.48776410 12.93048132 2.30245660

H 10.76161601 13.27826084 3.11815156  
H 12.59217959 6.57167983 0.65250549  
H 12.64258645 5.08851878 1.08891807  
H 3.62191032 10.44775253 10.41972165  
H 2.40760362 9.89680351 11.17753698  
H 1.91265957 1.79783168 13.01681308  
H 1.16475607 2.21612116 14.26032391  
H 4.74869839 11.07665279 15.48168966  
H 4.56164901 12.19708977 14.29191214  
H 9.35126004 2.83335922 3.45991614  
H 10.62949628 2.33817391 4.23930325  
H 8.73176080 1.46592172 11.93112854  
H 8.90090789 -0.05516157 11.96098720  
H 11.10839564 12.83888364 7.01728504  
H 9.65502848 13.35273919 6.53263393  
H 6.24047397 8.56434385 2.35364361  
H 6.45029063 6.99945283 2.44824566  
H 5.14441838 2.88082193 14.85198052  
H 4.33369532 1.78377231 14.15455053  
H -0.11028628 8.99276570 0.02998212  
H 0.72576386 9.64055780 -1.07579553  
H 1.48981768 7.18045086 13.70778855  
H 1.75938156 5.84811765 12.84039016  
H 11.90402617 10.17952546 7.88099935  
H 11.56735689 10.38811338 6.32507810  
H 9.91242851 1.91249297 8.00398705  
H 9.29902859 3.17288637 8.62365324  
H 4.31445954 2.20692674 4.72681984  
H 4.08055602 0.72339782 4.12754902  
H 1.27998354 13.14035017 9.49683455  
H 2.84469254 13.33685811 9.63119721  
H 6.45399775 10.04687596 13.71261610  
H 5.07112788 9.55409955 13.37949437  
H 12.06515893 5.64813366 3.90265893  
H 10.87420558 4.62267554 4.23253629  
H 0.53015890 11.42404452 12.49300795  
H 1.72704755 12.15455824 13.07572911  
H 3.34787631 2.42083294 8.30583110  
H 4.05524929 1.28381416 9.07816800  
H 4.14654002 15.21814815 13.69744035  
H 4.50530757 14.85732471 12.25184685  
H 10.42988012 3.65162487 0.05050916  
H 9.81542193 4.79039389 0.91080356  
H 14.09539751 1.14397133 5.44731010  
H 14.10414699 0.03764779 4.37532407  
H 8.69245146 10.59218314 14.61481882  
H 9.91156204 10.00246316 13.81313840

H 10.45843391 8.89089165 1.92396870  
H 11.85874953 8.66179359 2.41388089  
Br 10.96591883 5.79185006 8.90674921  
Cl 6.48134198 11.23569316 2.18003525  
Cl 5.60134545 4.84274870 2.06588515  
Cl 13.52966927 13.18130266 1.68755337

## 12.9 Aquachloro complex 5<sup>HH</sup>

242

Last snapshot from equilibration trajectory

Pt 6.076719 8.732503 6.435009  
Pt 8.377820 7.853343 6.227111  
C 6.388353 5.898290 6.896638  
C 5.928210 4.516874 7.136252  
C 4.585726 4.266947 6.975611  
C 3.690487 5.363962 6.884923  
C 4.152726 6.638248 6.670006  
C 7.684081 8.370248 9.038250  
C 7.946801 8.099410 10.409630  
C 6.873164 8.110424 11.310225  
C 5.615192 8.385674 10.753349  
C 5.369273 8.496236 9.441363  
N 5.474725 6.875174 6.667520  
N 6.444976 8.670927 8.547105  
N 5.543222 8.638261 4.519664  
N 6.712232 10.679059 6.294755  
N 8.316637 7.167114 4.233755  
N 9.326665 9.573604 5.607520  
O 7.654684 6.116783 6.705062  
O 8.704208 8.268241 8.205846  
O 4.020936 9.691199 6.670083  
O 2.530567 3.575692 4.682288  
O 5.810608 -1.048540 15.357677  
O 4.102045 11.661216 4.683677  
O 5.330689 15.527933 9.937737  
O -0.970793 7.920959 7.348116  
O 0.147661 5.957736 17.314598  
O 5.812971 6.439038 2.753716  
O 10.832660 15.249843 8.862346  
O 8.290287 12.247182 -2.576909  
O 15.303754 4.574474 14.829965  
O 16.051258 16.784924 11.389819  
O 13.708577 2.317650 14.876763  
O 11.334481 1.203035 4.118874  
O 1.104990 6.878452 5.721874

O 5.864524 3.137517 12.302382  
O 7.523615 0.997461 11.693978  
O 13.716855 18.441851 10.411448  
O 16.450052 8.423129 1.899309  
O 7.913213 6.009699 0.770461  
O 8.757661 2.127022 5.089653  
O 2.954702 6.503208 15.784761  
O 13.610647 15.171008 9.158175  
O 2.819693 10.918749 8.510869  
O 9.873007 4.666814 14.563963  
O 15.072264 14.911250 13.113326  
O 10.266245 11.822449 1.842369  
O -2.716809 9.795039 5.903341  
O 15.044698 4.416103 19.471655  
O 18.582985 0.055697 -1.268556  
O 10.278828 1.817530 -0.506189  
O 3.001233 14.056267 8.471052  
O 7.088771 11.158657 10.259708  
O 2.716901 1.126806 6.036960  
O 3.765715 13.715381 6.059504  
O 8.841554 -0.976467 7.313019  
O 16.003794 10.173952 7.167174  
O 7.630059 8.933074 2.108038  
O 10.711649 3.560519 8.738718  
O 3.491950 2.058058 11.651949  
O -3.398941 2.408902 16.934715  
O 2.949532 8.234259 19.353611  
O 10.780496 6.491025 11.337101  
O 12.232596 0.587530 12.860314  
O 9.083875 11.273483 7.806049  
O 8.841858 14.535860 3.878946  
O 8.233973 0.118696 14.166328  
O 13.369510 15.702959 5.925705  
O 9.925276 2.108316 11.318075  
O 16.200270 14.107694 9.938745  
O 11.991666 3.810146 12.710472  
O 8.541778 -3.204953 3.870304  
O 6.257782 14.973179 7.584822  
O 10.090416 13.405410 14.770522  
O 8.827083 4.378463 12.148735  
O 1.805271 12.963369 14.311688  
O 6.013491 -3.771903 2.985503  
O 5.820922 7.143612 14.908556  
O 12.369447 6.622004 8.853674  
O 13.739036 9.173356 2.885680  
O 5.490930 12.446026 8.158776  
O 11.473761 9.654519 1.026356

O 4.038527 11.645430 -1.326201  
O 4.058681 10.527602 0.775276  
O 3.714928 9.203776 -1.311079  
O 5.830285 10.150253 -0.808767  
O 5.006497 3.604636 0.199906  
O 2.605422 3.795037 0.223645  
O 3.731826 1.822494 1.202914  
O 3.949069 3.975229 2.366616  
O 12.651141 6.606839 3.368101  
O 10.536572 7.572046 2.615064  
O 12.203611 6.671221 0.954622  
O 10.912985 5.231179 2.360622  
H 6.642358 3.702804 6.971596  
H 4.104778 3.248490 6.857175  
H 2.643768 5.088377 6.619779  
H 3.471492 7.458880 6.515578  
H 9.005964 8.011759 10.551768  
H 6.873054 8.049090 12.361465  
H 4.789758 8.285661 11.438799  
H 4.342901 8.707897 9.059731  
H 4.527931 8.471947 4.467107  
H 5.991766 7.990920 3.875374  
H 5.721878 9.529289 4.052863  
H 5.944395 11.291109 6.666758  
H 6.841292 11.101933 5.336824  
H 7.550447 10.844090 6.797586  
H 7.750623 6.323479 4.162838  
H 9.334034 6.880338 4.050399  
H 8.088856 7.829003 3.505471  
H 8.818375 10.232977 4.991108  
H 10.253689 9.300043 5.227755  
H 9.633438 10.163885 6.397851  
H 3.968736 10.280935 5.861377  
H 3.737828 10.317182 7.408612  
H 1.592192 3.777168 4.438856  
H 3.091175 3.696999 3.901308  
H 5.467076 -1.782043 15.928854  
H 5.158156 -1.077513 14.584394  
H 3.161098 11.378955 4.519718  
H 3.903994 12.553470 5.388206  
H 6.025315 15.483158 10.607120  
H 4.673569 16.108004 10.426036  
H -1.693316 7.590468 7.902401  
H -1.415487 8.637825 6.741575  
H -0.730075 6.499771 17.262064  
H 0.210803 5.516942 16.471548  
H 6.355412 6.354839 1.857387

H 5.182904 5.642436 2.762364  
H 10.008337 14.738174 8.564985  
H 10.919333 15.798804 8.090855  
H 7.847673 11.795334 -1.827985  
H 8.941561 12.824039 -2.138926  
H 14.461731 4.226486 14.566548  
H 15.762553 3.790159 15.147202  
H 15.851562 16.105663 12.120504  
H 15.257008 17.316641 11.257632  
H 14.109751 1.471185 14.640284  
H 13.411371 2.187342 15.827085  
H 10.683481 0.478033 3.954060  
H 12.090725 0.918064 4.696258  
H 0.207401 7.095650 6.128958  
H 0.892679 5.946164 5.548085  
H 5.815420 3.409348 13.279606  
H 4.944247 2.702483 12.178531  
H 7.808781 0.573098 12.507850  
H 7.058577 1.836716 12.030812  
H 13.140734 18.949347 11.024403  
H 13.622428 18.947302 9.572143  
H 16.878563 8.633860 1.070711  
H 16.288164 7.431743 1.878931  
H 8.693789 5.644778 0.368499  
H 7.345372 6.170585 -0.067950  
H 8.581371 2.504298 4.197952  
H 9.747067 2.254390 5.077095  
H 2.977185 5.562894 15.315399  
H 3.331027 6.237857 16.634815  
H 12.685117 15.409779 9.247269  
H 13.988021 16.053114 9.296359  
H 1.889892 10.705393 8.169996  
H 2.961419 11.862162 8.633567  
H 9.477467 4.561354 13.613414  
H 10.789468 4.937284 14.510301  
H 14.114057 14.908089 12.954028  
H 15.540209 14.132630 13.500587  
H 10.048326 12.431622 1.061627  
H 10.587442 10.903006 1.494061  
H -3.082321 8.905739 5.728665  
H -2.315069 10.114237 5.040152  
H 15.212857 5.012473 18.676367  
H 14.205216 4.794926 19.797451  
H 18.618990 0.630310 -0.458955  
H 17.881105 -0.607587 -1.058401  
H 10.680589 1.634538 0.340436  
H 9.964768 2.770448 -0.520200

H 2.063437 14.017563 8.838951  
H 3.526588 14.195393 9.241934  
H 6.526836 10.572160 10.795126  
H 7.554843 11.781885 10.889200  
H 2.505815 1.972987 5.594491  
H 2.715140 1.334107 7.013020  
H 3.483452 13.658938 7.104232  
H 3.396952 14.535159 5.696628  
H 7.919332 -0.691259 7.455446  
H 8.993302 -0.762289 6.328047  
H 15.310550 9.622512 7.495481  
H 16.673925 9.657088 6.619117  
H 8.069070 9.770559 1.839762  
H 7.759498 8.270600 1.328449  
H 10.320545 4.068886 9.455056  
H 10.723997 4.185343 8.024482  
H 3.415897 1.237096 12.204767  
H 2.531603 2.138764 11.521646  
H -3.606734 3.341601 17.111721  
H -3.406245 1.985749 17.865156  
H 2.347949 7.609810 19.960014  
H 2.310666 8.158830 18.561604  
H 9.840855 6.520056 11.514619  
H 11.123842 5.838681 11.962947  
H 11.420161 0.905283 13.338784  
H 11.914285 0.035355 12.176273  
H 9.076390 12.223893 7.648606  
H 9.140067 11.162503 8.784201  
H 7.974703 14.876749 3.569746  
H 8.762012 13.565713 4.035605  
H 8.863661 0.915919 14.348695  
H 7.527169 0.128021 14.890662  
H 13.769119 14.817271 5.679746  
H 13.454925 15.822062 6.873982  
H 10.323988 1.900412 10.414387  
H 9.201818 1.479948 11.402600  
H 16.050043 15.016732 10.329805  
H 15.355021 13.736109 10.101009  
H 12.755468 3.479074 13.237956  
H 11.564608 2.997989 12.381897  
H 7.597605 -3.318424 3.511980  
H 9.148204 -3.286044 3.038227  
H 5.938602 15.601789 8.301464  
H 6.280643 15.546082 6.772632  
H 9.424122 14.124725 14.942271  
H 10.866875 13.919888 14.682015  
H 7.922043 4.160962 11.923787

H 9.334897 3.614097 11.764778  
H 2.611296 12.429336 14.105993  
H 1.892982 12.894715 15.235868  
H 5.194324 -3.597021 3.585504  
H 5.773027 -4.069088 2.077327  
H 4.936156 6.878675 15.283347  
H 5.667894 8.097026 14.795283  
H 11.677140 6.356764 8.191638  
H 11.897979 7.203225 9.486479  
H 13.860211 8.196292 2.903103  
H 14.636746 9.342144 2.483481  
H 5.529997 13.410470 8.381220  
H 5.885565 11.949544 8.948219  
H 12.406691 9.651597 1.213448  
H 11.120363 8.849896 1.406024  
Cl 10.644705 6.780308 6.186458  
Cl 4.377726 10.347083 -0.669434  
Cl 3.824547 3.256542 0.991000  
Cl 11.574164 6.495109 2.342716

## 12.10 Aquachloro complex 5<sup>HT</sup>

242

Last snapshot from equilibration trajectory

Pt 6.11927309 7.90864281 6.69108507  
Pt 8.73331572 7.04093902 6.62143325  
C 7.13587652 6.08384139 8.93053973  
C 6.89304858 5.25572417 10.06963615  
C 5.60767528 4.91509225 10.37490581  
C 4.49090874 5.35304872 9.62055048  
C 4.79269598 6.10265049 8.51495141  
C 8.05862012 9.59955393 8.21631329  
C 8.28200203 10.62338322 9.20547178  
C 10.38112197 9.30163103 8.01706391  
C 9.54522683 10.93315146 9.56826565  
C 10.63988940 10.24850328 8.96826830  
N 6.06459436 6.49162293 8.20276144  
N 4.90229622 6.70178032 5.48267224  
N 6.22900606 9.27241183 5.19694887  
N 7.97728292 5.39223964 5.63710188  
N 9.15571634 7.90633945 4.83654522  
N 9.13243332 8.93789113 7.65868433  
O 8.34288023 6.39451367 8.51334921  
O 3.80743017 8.68274628 6.97049027  
O 6.83956095 9.23691375 8.01805310  
O 1.08219874 3.93168039 1.65886983



O 14.13499153 4.56253380 8.04287293  
O 0.54044895 13.75101523 10.42594804  
O 5.85622116 5.84881574 13.80849265  
O 1.77484438 4.19853413 8.43477234  
O 8.46101324 6.91862168 13.72188618  
O 6.02750725 2.61739569 1.30885338  
O 12.71536473 10.28074399 14.54415043  
O 5.86051907 13.03075034 8.07702116  
O 15.58871671 5.68002396 6.03677081  
O 11.22235825 14.72224224 14.22794854  
O 10.56382766 5.01432677 12.60450465  
O 10.01648955 12.16434735 6.05842350  
O 2.41550657 14.79308888 4.22308985  
O 3.74865936 11.58451402 12.79574339  
O 2.77862358 8.27264917 9.55388487  
O 11.35952737 9.25317240 4.94769982  
O 13.65534532 12.16076189 5.59190445  
O 4.01852186 11.22539922 5.43744340  
O 9.46841375 10.35603875 3.09364591  
O 8.89426886 -0.64721472 7.64437263  
O 13.28234958 12.13049337 10.33203402  
O 1.26234451 13.78701719 13.55621690  
O 12.20268214 4.96372611 10.00269432  
O 6.37281372 11.91343104 14.16894217  
O 13.21669554 14.29514379 7.83233834  
O 3.37558976 2.26717375 2.19826378  
O 14.28628392 15.21925467 14.92644467  
O 11.72858350 11.60831159 2.02216180  
O 7.92584048 0.50146882 5.21980162  
O 0.55851580 9.78099655 -0.23020957  
O 6.99884689 14.73848212 9.97834732  
O 2.80901045 1.98952283 7.18493695  
O 7.37468422 5.32271001 2.79334261  
O 0.64354468 0.11638211 8.20600690  
O 13.50226064 3.27895154 14.36288288  
O 1.34587574 12.12274546 7.81997009  
O 1.69160459 2.13557332 14.41689019  
O 3.32690057 6.72266194 14.53528535  
O 1.85148507 5.52167860 11.66594378  
O 4.60744439 3.75216399 5.58633816  
O 10.70738274 2.16464591 8.87659003  
O 9.00005413 2.70965544 11.11079910  
O 9.67044357 13.67120912 3.09982508  
O 7.31926941 11.67406598 6.00579490  
O 14.30512399 1.58505581 9.95344673  
O 14.17234912 2.24000785 2.09139496  
O 7.52826446 3.25952220 13.53319394

O 14.36146312 8.50632799 9.54332806  
O 13.86715155 1.57894833 6.78315190  
O 8.77244200 2.97091941 6.30197558  
O 8.54222438 10.11968380 13.62859071  
O 12.46114089 1.76476852 12.29195598  
O 12.81603311 13.76392671 3.51716579  
O 6.82930762 13.94369440 12.64354721  
O 1.45925072 3.45473864 4.77581046  
O 9.17901171 3.78662389 0.88766776  
O 11.07609903 1.22259858 1.68223917  
O 12.05289706 3.38909977 3.73322438  
O 2.99222868 8.90289354 12.72850592  
O 7.13904922 9.01966255 2.31129730  
O 5.97868070 12.09574902 1.86659021  
O 6.75368695 14.16128542 2.68983729  
O 4.62587595 13.35524908 3.39661309  
O 4.95604284 14.09797152 1.12665876  
O 2.93366062 8.80875759 3.84100672  
O 4.84585965 7.82922353 2.76591412  
O 2.81757184 8.25499961 1.52592047  
O 2.95246118 6.45047166 3.18153644  
O 12.67303836 6.24223822 2.82952052  
O 10.56889994 7.15964630 2.22612366  
O 11.61239318 5.48948221 0.81343286  
O 12.61494250 7.72813015 1.05442069  
H 7.72572192 4.88794678 10.66809045  
H 5.47811467 4.21394834 11.21446100  
H 3.45180130 5.08493478 9.83955375  
H 3.98282790 6.50907194 7.92579029  
H 4.08245691 7.28836239 5.33965733  
H 4.55336154 5.75497477 5.74466250  
H 5.27543071 6.67867579 4.49639422  
H 5.31979004 9.63297847 4.85417325  
H 6.66116402 9.01694551 4.29903100  
H 6.79235137 10.11181112 5.52174645  
H 7.03257364 5.38735288 6.04414917  
H 8.38861627 4.45043705 5.86685163  
H 7.88001362 5.38774400 4.58092053  
H 9.17909070 8.86623683 5.11199399  
H 8.36997410 7.84365175 4.17564754  
H 9.98697337 7.57486713 4.35760916  
H 3.52568561 8.91074151 7.88190113  
H 3.44991517 9.33368107 6.32011586  
H 7.37789764 11.10644600 9.57883817  
H 11.17835762 8.82040543 7.48180393  
H 9.66491381 11.69165611 10.34217483  
H 11.66314937 10.48224830 9.26490444

H 1.97222389 3.73802675 2.02551674  
H 0.74951209 4.75962431 2.01734717  
H 13.28860451 4.66369324 8.53280407  
H 14.10772835 3.69734532 7.57400997  
H 0.89597052 14.40068498 9.77255777  
H 1.16702960 13.65694814 11.17185758  
H 4.88673370 6.01804349 13.94483378  
H 5.91867270 4.99082341 13.33819385  
H 1.94848597 4.50647402 7.53766143  
H 0.84773635 4.30648402 8.79770098  
H 9.01455301 6.68427916 14.48576417  
H 7.61727321 6.40576273 13.55588347  
H 6.33863811 1.82010533 1.77932684  
H 6.58135265 3.36856843 1.58574302  
H 13.20145328 10.58807262 15.32862903  
H 12.57744609 9.33020722 14.76246615  
H 5.91151897 13.87143890 8.57120142  
H 4.92526442 12.78989404 8.09961665  
H 14.96018630 6.22793534 5.52968919  
H 15.08176601 5.43515553 6.84019289  
H 11.25111516 13.80533238 14.54905914  
H 10.29572700 14.98372892 14.39846411  
H 9.85533137 4.60580673 13.13941156  
H 11.35714383 4.55185399 12.93943697  
H 10.88335555 12.45604532 6.41706864  
H 10.04373292 11.19783704 6.18565255  
H 2.98359494 14.06225938 3.93532035  
H 1.97805006 15.06728829 3.40150541  
H 4.28717473 12.27901605 12.36474441  
H 4.30786689 11.44075331 13.59161826  
H 2.06159681 7.60751586 9.51037289  
H 2.96679978 8.35615778 10.51222569  
H 11.84943238 8.55960840 4.45925200  
H 11.74674351 10.08110175 4.61290778  
H 14.50147926 11.72014484 5.84654726  
H 13.56461337 12.81203226 6.31430715  
H 3.55040254 11.61873808 4.67416966  
H 4.92146824 11.60544821 5.42357117  
H 10.22528183 9.76137351 3.22758042  
H 9.84620257 10.90584875 2.37177104  
H 8.43391601 -0.14077277 6.94538844  
H 8.60867437 -0.25770352 8.49312409  
H 14.07711778 12.73149386 10.39488245  
H 12.79998058 12.15508706 11.17584194  
H 0.94224072 12.87061055 13.52638164  
H 0.63049915 14.24916740 14.11883220  
H 11.51472594 4.99220040 10.70689336

H 11.99527476 5.76291465 9.45293446  
H 6.27652486 12.01961969 15.14530556  
H 6.84825262 11.08323595 13.97104624  
H 14.09881694 14.10954786 8.20512686  
H 12.63569087 14.34919691 8.61967042  
H 2.96844504 1.82912841 1.40247727  
H 4.24395480 2.62461195 1.84811040  
H 13.54398129 14.68998474 14.61246069  
H 13.89890237 16.10284583 15.17243375  
H 12.23296055 12.29614523 2.55374973  
H 11.84321255 11.80234399 1.08025997  
H 7.05298454 0.10724746 5.00564756  
H 8.48258840 0.40355836 4.42137754  
H 0.88801316 9.19152960 0.46249582  
H -0.38727076 9.57478223 -0.37700848  
H 7.03187901 14.45378339 10.93503306  
H 6.67578949 15.64541260 9.86537488  
H 2.22495596 2.56903294 7.74733383  
H 2.76930688 2.25349623 6.24349009  
H 7.01199270 6.14707401 2.41132900  
H 8.04474317 4.91145128 2.20707213  
H -0.09962711 0.70804172 8.48994808  
H 1.18186253 0.63005839 7.56585390  
H 13.46173247 4.22305617 14.09421978  
H 13.58836795 3.34817367 15.33346515  
H 1.19069994 11.66424353 8.65881486  
H 1.01677334 13.03540476 7.92344237  
H 1.29713064 1.24231993 14.45340262  
H 0.95071984 2.70225046 14.74664101  
H 3.45987450 7.66481366 14.25775728  
H 3.50019823 6.67604757 15.48852648  
H 2.31948505 6.12984501 12.26939150  
H 1.49852005 4.87369482 12.29422113  
H 3.68575875 3.75184934 5.24772983  
H 5.04988002 3.41488616 4.77917036  
H 11.15813199 3.01452120 8.69157738  
H 11.35588062 1.44040243 8.82221585  
H 9.80660839 2.42187404 10.64019308  
H 9.26676217 3.53794707 11.56524762  
H 8.67948854 13.68197110 3.00115467  
H 9.79057948 12.84854995 3.62131845  
H 8.19210503 12.11371306 5.91282898  
H 6.87128080 12.06270670 6.80643733  
H 13.61615507 1.99239086 10.52646593  
H 14.86777054 1.10566969 10.60421956  
H 14.29525665 2.42047225 3.03192428  
H 15.10035559 2.05886185 1.84977348

H 7.60247355 2.88847415 14.43553576  
H 7.64238976 2.49985133 12.92978317  
H 13.83628736 9.31764086 9.71232235  
H 13.86735526 7.78262703 9.96437682  
H 14.01936870 0.61434881 6.77522848  
H 13.91762718 1.77351936 5.83532162  
H 8.45820503 2.03765611 6.22400697  
H 9.37689432 2.98816679 7.06487985  
H 8.21406587 9.19910892 13.79759526  
H 9.30768689 10.04392061 13.04345133  
H 12.26822866 0.96726247 12.81127013  
H 13.35956972 1.97923005 12.55829176  
H 13.66627050 13.49447654 3.92105121  
H 12.22142231 13.78123865 4.29174023  
H 6.59567051 13.09335467 13.13795118  
H 6.79659255 14.63485742 13.32660402  
H 1.14311265 4.31828829 5.08833379  
H 1.16411476 3.54324914 3.83146851  
H 9.97923255 4.30448916 0.64057430  
H 9.39504426 3.37234657 1.72967852  
H 11.32908183 0.66215805 2.42055413  
H 11.67402807 1.07546631 0.92916553  
H 12.32508255 3.95953307 2.98554503  
H 11.16119158 3.11695020 3.47140422  
H 3.44203681 9.75386383 12.48897987  
H 2.06509340 9.15461333 12.84208655  
H 7.54951327 9.82465294 1.97366520  
H 6.26439216 8.83823323 1.93000380  
Cl 10.81931875 5.82723125 7.00253872  
Cl 5.57178629 13.41275622 2.25739948  
Cl 3.33123051 7.83379901 2.81289718  
Cl 11.86887246 6.67557980 1.69675453

## References

- (1) J. VandeVondele, F. Mohamed, M. Krack, J. Hutter, M. Sprik and M. Parrinello, *J. Chem. Phys.*, 2005, **122**, year.
- (2) H. S. Lee and M. E. Tuckerman, *J. Chem. Phys.*, 2007, **126**, 164501–16.
- (3) A. Soper and M. Phillips, *Chem. Phys.*, 1986, **107**, 47–60.
- (4) A. Soper, *Chem. Phys.*, 2000, **258**, 121–137.
- (5) G. Hura, D. Russo, R. M. Glaeser, T. Head-Gordon, M. Krack and M. Parrinello, *Phys. Chem. Chem. Phys.*, 2003, **5**, 1981–1991.
- (6) A. K. Soper and C. J. Benmore, *Phys. Rev. Lett.*, 2008, **101**, 065502.
- (7) J. A. Morrone and R. Car, *Phys. Rev. Lett.*, 2008, **101**, 017801.
- (8) M. Mitchell, B. Muftakhidinov, T. Winchen, Z. Jędrzejewski-Szmek, T. G. Badger and badshah400, *markummitchell/engauge-digitizer: Version 10.4*, 2017.
- (9) L. S. Hollis and S. J. Lippard, *Inorg. Chem.*, 1983, **22**, 2605–2614.
- (10) L. S. Hollis, M. M. Roberts and S. J. Lippard, *Inorg. Chem.*, 1983, **22**, 3637–3644.
- (11) S. Iwatsuki, E. Isomura, A. Wada, K. Ishihara and K. Matsumoto, *Eur. J. Inorg. Chem.*, 2006, **2006**, 2484–2490.
- (12) L. C. Ducati, A. Marchenko and J. Autschbach, *Inorg. Chem.*, 2016, **55**, 12011–12023.
- (13) R. A. DiStasio Jr., V. V. Gobre and A. Tkatchenko, *J. Phys.: Condens. Matter*, 2014, **26**, 213202.
- (14) S. Moncho and J. Autschbach, *J. Chem. Theory Comput.*, 2010, **6**, 223–234.
- (15) J.P. Perdew, A. Zunger, *Phys. Rev. B*, 1981, **23**, 5048–5079.
- (16) A. D. Becke, *J. Chem. Phys.*, 1993, **98**, 5648–5652.
